# Supplementary material for: A Study of the Vehicle Tire Damage Detection using Split Spectrum Processing
Source: Royal Society of Chemistry journal article supplement (doi:10.1039/c7ob01343d), 2010-01-01

**Synthesis of 2,3'-Spirobi[indolin]-2-ones Enabled by a Tandem Nucleophilic  
Benzoylation/C(sp<sup>2</sup>)-N Cross-Coupling Reaction Sequence**

Baodong Cui, Jing Shan, Changlun Yuan, Wenyong Han, Nanwei Wan, Yongzheng Chen\*

*School of Pharmacy, Zunyi Medical University, Zunyi, 563000, P. R. China*

*yzchen@zmc.edu.cn*

**Supporting Information**

**Table of Contents**

|                                                                                   |     |
|-----------------------------------------------------------------------------------|-----|
| 1. General methods.....                                                           | S1  |
| 2. General procedure for synthesis of 2,3'-spirobi[indolin]-2-ones <b>3</b> ..... | S1  |
| 3. Control experiments.....                                                       | S9  |
| 4. Crystallographic information for compound <b>3j</b> .....                      | S9  |
| 5. NMR spectra for compounds <b>3</b> and <b>4</b> .....                          | S10 |

## 1. General methods

Reagents were purchased from commercial sources and were directly used unless otherwise noted.  $^1\text{H}$  NMR and  $^{13}\text{C}$  NMR (400 and 100 MHz, respectively) spectra were recorded in  $\text{CDCl}_3$ .  $^1\text{H}$  NMR chemical shifts are reported in ppm relative to tetramethylsilane (TMS) with the solvent resonance employed as the internal standard ( $\text{CDCl}_3$  at 7.26 ppm). Data are reported as the follows: chemical shift, multiplicity (s = singlet, d = doublet, t = triplet, q = quartet and m = multiplet), coupling constants (Hz) and integration.  $^{13}\text{C}$  NMR chemical shifts are reported in ppm relative to tetramethylsilane (TMS) with the solvent resonance as the internal standard ( $\text{CDCl}_3$  at 77.16 ppm).

## 2. General procedure for synthesis of 2,3'-spirobi[indoline]-2-ones **3**

In a 5 mL of flame-dried vial with a stir bar, the mixture of 3-aminooxindoles **1** (0.2 mmol), 2-bromobenzyl bromides **2** (0.22 mmol, 1.1 equiv.), CuBr (0.01 mmol, 1.4 mg),  $t\text{BuONa}$  (0.8 mmol, 76.8 mg, 4.0 equiv.) in 2.0 mL of DMF was stirred at 100 or 170 °C for specified time. After completion of the reaction indicated by TLC, 10.0 mL of water was added into the mixture and the solution was extracted with EtOAc ( $6 \times 5$  mL). The combined organic layers were dried over anhydrous  $\text{Na}_2\text{SO}_4$ , filtered, concentrated, and the residue was purified by flash column chromatography on silica gel (petroleum ether/ethyl acetate = 5:1) to afford the products **3**. It was noted that the reaction mixtures could be directly purified by flash column chromatography on silica gel when the reactions were performed in mesitylene.

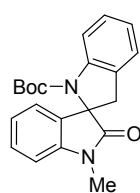

**Tert-butyl 1-methyl-2-oxo-2,3'-spirobi[indoline]-1'-carboxylate 3a:** Yellow oil; 60.3 mg, yield 86%.  $^1\text{H}$  NMR (400 MHz,  $\text{CDCl}_3$ ):  $\delta$  1.12 (s, 9H), 3.21 (d,  $J = 16.7$  Hz, 1H), 3.25 (s, 3H), 3.65 (d,  $J = 16.1$  Hz, 1H), 6.85 (d,  $J = 7.7$  Hz, 1H), 6.98-7.03 (m, 2H), 7.10-7.15 (m, 2H), 7.24-7.27 (m, 1H), 7.30-7.34 (m, 1H), 7.98 (d,  $J = 8.1$  Hz, 1H);  $^{13}\text{C}$  NMR (100 MHz,  $\text{CDCl}_3$ ):  $\delta$  26.6, 27.9, 41.6, 68.8, 81.5, 108.1, 115.1, 121.8, 123.0, 123.2, 124.5, 127.0, 128.1, 129.2, 132.6, 142.7, 143.3, 151.1, 176.7. HRMS (ESI-TOF) calcd. for  $\text{C}_{21}\text{H}_{22}\text{N}_2\text{NaO}_3$  [ $\text{M} + \text{Na}$ ] $^+$  373.1523; found: 373.1523.

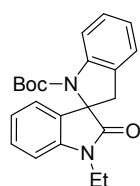

**Tert-butyl 1-ethyl-2-oxo-2,3'-spirobi[indoline]-1'-carboxylate 3b:** White solid; 40.1 mg, yield 55%; mp 206.7-207.9 °C.  $^1\text{H}$  NMR (400 MHz,  $\text{CDCl}_3$ ):  $\delta$  1.11 (s, 9H), 1.33 (t,  $J = 7.2$  Hz, 3H), 3.23 (d,  $J = 16.0$  Hz, 1H), 3.44-3.50 (m, 1H), 3.63 (d,

$J = 16.1$  Hz, 1H), 4.05-4.12 (m, 1H), 6.87 (d,  $J = 7.8$  Hz, 1H), 6.97-7.02 (m, 2H), 7.10-7.14 (m, 2H), 7.23 (d,  $J = 7.7$  Hz, 1H), 7.28-7.32 (m, 1H), 7.98 (d,  $J = 7.9$  Hz, 1H);  $^{13}\text{C}$  NMR (100 MHz,  $\text{CDCl}_3$ ):  $\delta$  13.1, 27.9, 35.2, 41.7, 68.8, 81.6, 108.2, 115.1, 121.9, 123.0, 124.4, 127.0, 128.1, 129.1, 132.8, 142.0, 143.5, 151.1, 176.2. HRMS (ESI-TOF) calcd. for  $\text{C}_{22}\text{H}_{25}\text{N}_2\text{O}_3$   $[\text{M} + \text{H}]^+$  365.1860; found: 365.1869.

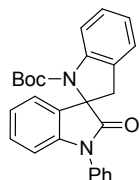

**Tert-butyl 2-oxo-1-phenyl-2,3'-spirobi[indoline]-1'-carboxylate 3c:** White solid; 42.1 mg, yield 51%; mp 202.4-203.6 °C.  $^1\text{H}$  NMR (400 MHz,  $\text{CDCl}_3$ ):  $\delta$  1.17 (s, 9H), 3.39 (d,  $J = 16.1$  Hz, 1H), 3.75 (d,  $J = 16.1$  Hz, 1H), 7.02-7.09 (m, 3H), 7.16-7.22 (m, 3H), 7.28 (s, 1H), 7.39-7.42 (m, 1H), 7.55-7.56 (m, 4H), 8.04 (d,  $J = 7.8$  Hz, 1H);  $^{13}\text{C}$  NMR (100 MHz,  $\text{CDCl}_3$ ):  $\delta$  28.1, 42.5, 69.0, 82.0, 109.7, 115.2, 122.2, 123.1, 123.8, 124.5, 125.6, 126.8, 127.8, 128.2, 129.0, 129.6, 132.7, 134.5, 142.2, 143.5, 151.2, 175.8. HRMS (ESI-TOF) calcd. for  $\text{C}_{26}\text{H}_{24}\text{N}_2\text{NaO}_3$   $[\text{M} + \text{Na}]^+$  435.1679; found: 435.1686.

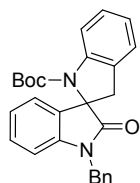

**Tert-butyl 1-benzyl-2-oxo-2,3'-spirobi[indoline]-1'-carboxylate 3d:** Yellow oil; 40.1 mg, yield 47%.  $^1\text{H}$  NMR (400 MHz,  $\text{CDCl}_3$ ):  $\delta$  1.12 (s, 9H), 3.31 (d,  $J = 16.0$  Hz, 1H), 3.73 (d,  $J = 16.0$  Hz, 1H), 4.41 (d,  $J = 15.4$  Hz, 1H), 5.42 (d,  $J = 15.4$  Hz, 1H), 6.78 (d,  $J = 7.1$  Hz, 1H), 6.96-7.01 (m, 1H), 7.03 (d,  $J = 7.3$  Hz, 1H), 7.12-7.17 (m, 2H), 7.21 (d,  $J = 7.2$  Hz, 1H), 7.28 (d,  $J = 10.0$  Hz, 2H), 7.36 (s, 4H), 8.02 (d,  $J = 7.4$  Hz, 1H);  $^{13}\text{C}$  NMR (100 MHz,  $\text{CDCl}_3$ ):  $\delta$  27.8, 41.8, 44.1, 68.8, 81.7, 109.0, 115.1, 121.8, 123.0, 123.2, 124.5, 126.9, 127.6, 127.9, 128.1, 129.0, 129.1, 132.7, 135.9, 141.9, 143.5, 151.1, 176.8. HRMS (ESI-TOF) calcd. for  $\text{C}_{27}\text{H}_{26}\text{N}_2\text{NaO}_3$   $[\text{M} + \text{Na}]^+$  449.1836; found: 449.1851.

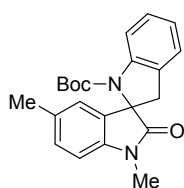

**Tert-butyl 1,5-dimethyl-2-oxo-2,3'-spirobi[indoline]-1'-carboxylate 3e:** Colourless oil; 51.0 mg, yield 70%.  $^1\text{H}$  NMR (400 MHz,  $\text{CDCl}_3$ ):  $\delta$  1.13 (s, 9H), 2.24 (s, 3H), 3.19 (d,  $J = 16.1$  Hz, 1H), 3.22 (s, 3H), 3.63 (d,  $J = 16.1$  Hz, 1H), 6.73 (d,  $J = 7.8$  Hz, 1H), 6.91 (s, 1H), 6.99-7.03 (m, 1H), 7.10 (d,  $J = 7.7$  Hz, 1H), 7.14 (d,  $J = 7.4$  Hz, 1H), 7.23-7.27 (m, 1H), 7.98 (d,  $J = 8.1$  Hz, 1H);  $^{13}\text{C}$  NMR (100 MHz,  $\text{CDCl}_3$ ):  $\delta$  21.1, 26.6, 27.9, 41.6, 68.9, 81.5, 107.9, 115.1, 122.5, 123.0, 124.5, 127.2, 128.1, 129.4, 132.6, 132.9, 140.3, 143.4, 151.2, 176.6. HRMS (ESI-TOF) calcd. for  $\text{C}_{22}\text{H}_{24}\text{N}_2\text{NaO}_3$   $[\text{M} + \text{Na}]^+$  387.1679; found: 387.1686.

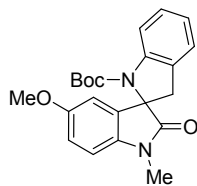

**Tert-butyl 5-methoxy-1-methyl-2-oxo-2,3'-spirobi[indoline]-1'-carboxylate**

**3f:** White solid; 54.0 mg, yield 71%; mp 163.2-164.5 °C. <sup>1</sup>H NMR (400 MHz, CDCl<sub>3</sub>): δ 1.14 (s, 9H), 3.20 (d, *J* = 16.2 Hz, 1H), 3.22 (s, 3H), 3.64 (d, *J* =

16.2 Hz, 1H), 3.70 (s, 3H), 6.71 (d, *J* = 1.9 Hz, 1H), 6.74 (d, *J* = 8.5 Hz, 1H),

6.82-6.84 (m, 1H), 6.98-7.02 (m, 1H), 7.13 (d, *J* = 7.3 Hz, 1H), 7.23 (d, *J* = 7.7 Hz, 1H), 7.97 (d, *J* =

8.1 Hz, 1H); <sup>13</sup>C NMR (100 MHz, CDCl<sub>3</sub>): δ 26.6, 27.9, 41.6, 56.0, 69.1, 81.5, 108.6, 109.0,

113.6, 115.1, 123.0, 124.5, 127.0, 128.1, 133.7, 136.2, 143.3, 151.0, 156.6, 176.4. HRMS (ESI-

TOF) calcd. for C<sub>22</sub>H<sub>24</sub>N<sub>2</sub>NaO<sub>4</sub> [M + Na]<sup>+</sup> 403.1628; found: 403.1626.

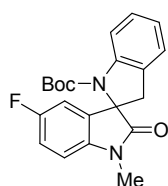

**Tert-butyl 5-fluoro-1-methyl-2-oxo-2,3'-spirobi[indoline]-1'-carboxylate 3g:**

White solid; 59.0 mg, yield 80%; mp 190.3-192.1 °C. <sup>1</sup>H NMR (400 MHz, CDCl<sub>3</sub>): δ 1.15 (s, 9H), 3.19 (d, *J* = 16.5 Hz, 1H), 3.24 (s, 3H), 3.65 (d, *J* = 16.0

Hz, 1H), 6.76-6.78 (m, 1H), 6.87 (d, *J* = 6.5 Hz, 1H), 7.00-7.04 (m, 2H), 7.14 (d,

*J* = 7.0 Hz, 1H), 7.24-7.27 (m, 1H), 7.97 (d, *J* = 7.8 Hz, 1H); <sup>13</sup>C NMR (100 MHz, CDCl<sub>3</sub>): δ 26.8,

27.9, 41.6, 68.9, 81.8, 108.7 (d, *J* = 7.6 Hz, 1C), 110.1 (d, *J* = 24.8 Hz, 1C), 115.2, 115.4 (d, *J* =

23.4 Hz, 1C), 123.2, 124.5, 126.6, 128.3, 134.0, 138.7, 143.2, 150.8, 159.6 (d, *J* = 240.9 Hz, 1C),

176.4. HRMS (ESI-TOF) calcd. for C<sub>21</sub>H<sub>21</sub>FN<sub>2</sub>NaO<sub>3</sub> [M + Na]<sup>+</sup> 391.1428; found: 391.1436.

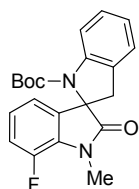

**Tert-butyl 7-fluoro-1-methyl-2-oxo-2,3'-spirobi[indoline]-1'-carboxylate 3h:**

Yellow solid; 41.3 mg, yield 56%; mp 161.2-162.7 °C. <sup>1</sup>H NMR (400 MHz, CDCl<sub>3</sub>):

δ 1.18 (s, 9H), 3.20 (d, *J* = 16.1 Hz, 1H), 3.46 (s, 3H), 3.64 (d, *J* = 16.0 Hz, 1H),

6.88-6.94 (m, 2H), 6.99-7.07 (m, 2H), 7.13 (d, *J* = 7.4 Hz, 1H), 7.23-7.27 (m, 1H),

7.97 (d, *J* = 8.1 Hz, 1H); <sup>13</sup>C NMR (100 MHz, CDCl<sub>3</sub>): δ 27.9, 28.4, 41.7, 68.8, 81.8, 115.1, 117.1

(d, *J* = 19.2 Hz, 1C), 117.7, 123.1, 123.9 (d, *J* = 6.2 Hz, 1C), 124.5, 126.7, 128.2, 129.8, 135.4,

143.2, 147.7 (d, *J* = 242.3 Hz, 1C), 150.9, 176.3. HRMS (ESI-TOF) calcd. for C<sub>21</sub>H<sub>21</sub>FN<sub>2</sub>NaO<sub>3</sub> [M

+ Na]<sup>+</sup> 391.1428; found: 391.1424.

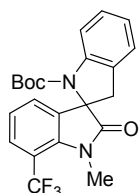

**Tert-butyl 1-methyl-2-oxo-7-(trifluoromethyl)-2,3'-spirobi[indoline]-1'-**

**carboxyl -ate 3i:** Yellow oil; 49.4 mg, yield 59%. <sup>1</sup>H NMR (400 MHz, CDCl<sub>3</sub>): δ

1.14 (s, 9H), 3.19 (d, *J* = 16.1 Hz, 1H), 3.47 (s, 3H), 3.65 (d, *J* = 15.9 Hz, 1H),

7.03-7.08 (m, 2H), 7.15 (d, *J* = 6.3 Hz, 1H), 7.28 (s, 2H), 7.61 (d, *J* = 7.4 Hz, 1H),

7.98 (d, *J* = 7.5 Hz, 1H); <sup>13</sup>C NMR (100 MHz, CDCl<sub>3</sub>): δ 27.8, 28.4, 42.1, 67.1, 82.1, 112.6 (q, *J* =

33.2 Hz, 1C), 115.1, 122.3, 122.6, 123.3, 124.6, 125.2, 126.5, 127.0 (q, *J* = 5.9 Hz, 1C), 128.4,

135.2, 140.5, 143.2, 150.7, 176.3. HRMS (ESI-TOF) calcd. for  $C_{22}H_{21}F_3N_2NaO_3$   $[M + Na]^+$  441.1397; found: 441.1401.

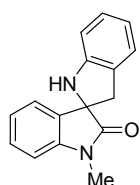

**1-Methyl-2,3'-spirobi[indolin]-2-one 3j:** Yellow solid; 31.0 mg, yield 62%; mp

259.9-262.1 °C.  $^1H$  NMR (400 MHz,  $CDCl_3$ ):  $\delta$  3.23 (s, 3H), 3.25 (d,  $J = 15.8$  Hz, 1H), 3.61 (d,  $J = 15.8$  Hz, 1H), 4.18 (s, 1H), 6.71 (d,  $J = 7.6$  Hz, 1H), 6.79-6.86 (m, 2H), 6.99-7.02 (m, 1H), 7.08-7.14 (m, 2H), 7.24 (d,  $J = 7.7$  Hz, 1H), 7.29-7.33 (m,

1H);  $^{13}C$  NMR (100 MHz,  $CDCl_3$ ):  $\delta$  26.6, 41.9, 68.3, 108.5, 110.0, 119.8, 122.8, 123.4, 124.7, 126.7, 127.9, 129.6, 133.1, 142.6, 149.9, 178.5. HRMS (ESI-TOF) calcd. for  $C_{16}H_{15}N_2O$   $[M + H]^+$  251.1179; found: 251.1182.

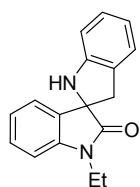

**1-Ethyl-2,3'-spirobi[indolin]-2-one 3k:** Yellow solid; 44.9 mg, yield 85%; mp

252.1-253.2 °C.  $^1H$  NMR (400 MHz,  $CDCl_3$ ):  $\delta$  1.30 (t,  $J = 7.1$  Hz, 3H), 3.25 (d,  $J = 15.7$  Hz, 1H), 3.62 (d,  $J = 15.8$  Hz, 1H), 3.78-3.81 (m, 2H), 4.19 (s, 1H), 6.71 (d,  $J = 7.6$  Hz, 1H), 6.78-6.83 (m, 1H), 6.88 (d,  $J = 7.6$  Hz, 1H), 6.98-7.01 (m, 1H), 7.09-

7.14 (m, 2H), 7.25 (d,  $J = 7.4$  Hz, 1H), 7.29-7.32 (m, 1H);  $^{13}C$  NMR (100 MHz,  $CDCl_3$ ):  $\delta$  12.8, 35.1, 42.0, 68.3, 108.6, 110.1, 119.8, 123.0, 123.2, 124.7, 126.8, 127.9, 129.5, 133.4, 141.7, 149.9, 178.1. HRMS (ESI-TOF) calcd. for  $C_{17}H_{17}N_2O$   $[M + H]^+$  265.1335; found: 265.1339.

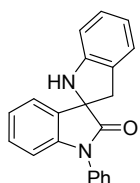

**1-Phenyl-2,3'-spirobi[indolin]-2-one 3l:** White solid; 29.4 mg, yield 47%; mp

223.8-224.6 °C.  $^1H$  NMR (400 MHz,  $CDCl_3$ ):  $\delta$  3.39 (d,  $J = 15.8$  Hz, 1H), 3.75 (d,  $J = 15.7$  Hz, 1H), 4.35 (s, 1H), 6.75 (d,  $J = 7.5$  Hz, 1H), 6.82-6.88 (m, 2H), 7.03-7.07

(m, 1H), 7.11-7.17 (m, 2H), 7.23 (d,  $J = 7.6$  Hz, 1H), 7.33 (d,  $J = 7.4$  Hz, 1H), 7.40-7.47 (m, 3H), 7.52-7.55 (m, 2H);  $^{13}C$  NMR (100 MHz,  $CDCl_3$ ):  $\delta$  42.6, 68.4, 109.8, 110.1, 119.9, 123.2, 123.9, 124.8, 126.5, 126.6, 128.0, 128.2, 129.5, 129.8, 133.0, 134.4, 142.4, 149.9, 177.9. HRMS (ESI-TOF) calcd. for  $C_{21}H_{17}N_2O$   $[M + H]^+$  313.1335; found: 313.1347.

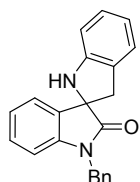

**1-Benzyl-2,3'-spirobi[indolin]-2-one 3m:** Yellow solid; 48.3 mg, yield 74%; mp

211.9-213.4 °C.  $^1H$  NMR (400 MHz,  $CDCl_3$ ):  $\delta$  3.32 (d,  $J = 15.7$  Hz, 1H), 3.69 (d,  $J = 15.8$  Hz, 1H), 4.26 (s, 1H), 4.89 (d,  $J = 15.5$  Hz, 1H), 4.96 (d,  $J = 15.6$  Hz, 1H),

6.73-6.76 (m, 2H), 6.81-6.85 (m, 1H), 6.95-6.99 (m, 1H), 7.10-7.21 (m, 3H), 7.25-7.29 (m, 2H), 7.33 (s, 4H);  $^{13}C$  NMR (100 MHz,  $CDCl_3$ ):  $\delta$  42.2, 44.1, 68.3, 109.5, 110.1, 119.9, 123.0, 123.4, 124.8, 126.7, 127.5, 127.9, 128.0, 129.0, 129.5, 133.1, 135.8, 141.7, 149.9, 178.7. HRMS (ESI-TOF) calcd. for  $C_{22}H_{18}N_2NaO$   $[M + Na]^+$  349.1311; found: 349.1323.

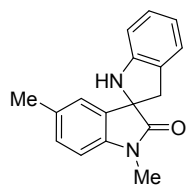

**1,5-Dimethyl-2,3'-spirobi[indolin]-2-one 3n:** Yellow solid; 40.2 mg, yield 76%; mp 251.8-252.4 °C. <sup>1</sup>H NMR (400 MHz, CDCl<sub>3</sub>): δ 2.26 (s, 3H), 3.21 (s, 3H), 3.24 (d, *J* = 15.8 Hz, 1H), 3.61 (d, *J* = 15.8 Hz, 1H), 4.17 (s, 1H), 6.70-6.75 (m, 2H), 6.80-6.83 (m, 1H), 7.06 (s, 1H), 7.09-7.12 (m, 3H); <sup>13</sup>C NMR (100 MHz, CDCl<sub>3</sub>): δ 21.1, 26.6, 42.0, 68.3, 108.2, 110.0, 119.8, 123.6, 124.7, 126.8, 127.9, 129.8, 133.1, 133.2, 140.2, 149.9, 178.5. HRMS (ESI-TOF) calcd. for C<sub>17</sub>H<sub>17</sub>N<sub>2</sub>O [M + H]<sup>+</sup> 265.1335; found: 265.1339.

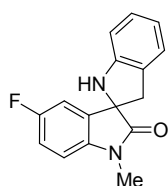

**5-Fluoro-1-methyl-2,3'-spirobi[indolin]-2-one 3o:** White solid; 39.2 mg, yield 73%; mp 190.9-192.8 °C. <sup>1</sup>H NMR (400 MHz, CDCl<sub>3</sub>): δ 3.22 (s, 3H), 3.23 (d, *J* = 15.8 Hz, 1H), 3.61 (d, *J* = 15.8 Hz, 1H), 4.21 (s, 1H), 6.71 (d, *J* = 7.6 Hz, 1H), 6.76-6.83 (m, 2H), 6.98-7.02 (m, 2H), 7.08-7.13 (m, 2H); <sup>13</sup>C NMR (100 MHz, CDCl<sub>3</sub>): δ 26.7, 42.0, 68.5, 109.1 (d, *J* = 7.9 Hz, 1C), 110.1, 111.1 (d, *J* = 24.7 Hz, 1C), 115.7 (d, *J* = 23.4 Hz, 1C), 120.0, 124.8, 126.3, 128.1, 134.6 (d, *J* = 7.6 Hz, 1C), 138.4, 149.6, 159.7 (d, *J* = 240.9 Hz, 1C), 178.2. HRMS (ESI-TOF) calcd. for C<sub>16</sub>H<sub>13</sub>FN<sub>2</sub>NaO [M + Na]<sup>+</sup> 291.0904; found: 291.0911.

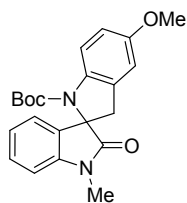

**Tert-butyl 5'-methoxy-1-methyl-2-oxo-2,3'-spirobi[indoline]-1'-carboxylate 3p:** Yellow solid; 50.2 mg, yield 66%; mp 168.7-169.5 °C. <sup>1</sup>H NMR (400 MHz, CDCl<sub>3</sub>): δ 1.11 (s, 9H), 3.16 (d, *J* = 16.2 Hz, 1H), 3.24 (s, 3H), 3.61 (d, *J* = 16.1 Hz, 1H), 3.78 (s, 3H), 6.72 (s, 1H), 6.78 (d, *J* = 8.5 Hz, 1H), 6.83 (d, *J* = 7.6 Hz, 1H), 6.98-7.01 (m, 1H), 7.10 (d, *J* = 7.0 Hz, 1H), 7.29-7.33 (m, 1H), 7.87 (d, *J* = 8.6 Hz, 1H); <sup>13</sup>C NMR (100 MHz, CDCl<sub>3</sub>): δ 26.6, 27.9, 41.6, 55.8, 68.9, 81.3, 108.1, 110.9, 112.7, 115.5, 121.8, 123.2, 128.4, 129.2, 132.6, 137.0, 142.8, 151.1, 156.0, 176.6. HRMS (ESI-TOF) calcd. for C<sub>22</sub>H<sub>24</sub>N<sub>2</sub>NaO<sub>4</sub> [M + Na]<sup>+</sup> 403.1628; found: 403.1636.

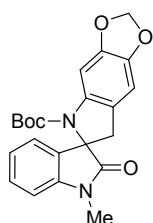

**Tert-butyl 5'-methyl-2'-oxospiro[[1,3]dioxolo[4,5-f]indole-6,3'-indoline]-5(7H)-carboxylate 3q:** Yellow solid; 51.3 mg, yield 65%; mp 228.0-229.6 °C. <sup>1</sup>H NMR (400 MHz, CDCl<sub>3</sub>): δ 1.10 (s, 9H), 3.09 (d, *J* = 15.8 Hz, 1H), 3.23 (s, 3H), 3.54 (d, *J* = 15.7 Hz, 1H), 5.93 (d, *J* = 7.6 Hz, 2H), 6.61 (s, 1H), 6.83 (d, *J* = 7.4 Hz, 1H), 7.00-7.02 (m, 1H), 7.13 (d, *J* = 6.8 Hz, 1H), 7.29-7.31 (m, 1H), 7.63 (s, 1H); <sup>13</sup>C NMR (100 MHz, CDCl<sub>3</sub>): δ 26.6, 27.9, 41.3, 69.4, 81.4, 98.4, 101.4, 104.9, 108.1, 118.7, 121.7, 123.2, 129.3, 132.5, 137.6, 142.7, 143.5, 147.5, 151.0, 176.5. HRMS (ESI-TOF) calcd. for

C<sub>22</sub>H<sub>22</sub>N<sub>2</sub>NaO<sub>5</sub> [M + Na]<sup>+</sup> 417.1421; found: 417.1428.

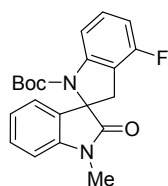

**Tert-butyl 4'-fluoro-1-methyl-2-oxo-2,3'-spirobi[indoline]-1'-carboxylate 3r:**

White solid; 48.0 mg, yield 65%; mp 162.8-164.0 °C. <sup>1</sup>H NMR (400 MHz, CDCl<sub>3</sub>): δ 1.12 (s, 9H), 3.23 (d, *J* = 16.4 Hz, 1H), 3.25 (s, 3H), 3.62 (d, *J* = 16.4 Hz, 1H), 6.71-6.75 (m, 1H), 6.85 (d, *J* = 7.7 Hz, 1H), 7.01-7.05 (m, 1H), 7.14 (d, *J* = 7.6 Hz, 1H), 7.20-7.24 (m, 1H), 7.31-7.35 (m, 1H), 7.76 (d, *J* = 8.0 Hz, 1H); <sup>13</sup>C NMR (100 MHz, CDCl<sub>3</sub>): δ 26.7, 27.8, 42.8, 69.3, 82.0, 108.3, 109.9 (d, *J* = 19.4 Hz, 1C), 111.0, 113.9, 121.9, 123.4, 125.8, 129.5, 130.1 (d, *J* = 7.6 Hz, 1C), 132.2, 142.8, 150.9, 158.9 (d, *J* = 245.1 Hz, 1C), 176.2. HRMS (ESI-TOF) calcd. for C<sub>21</sub>H<sub>21</sub>FN<sub>2</sub>NaO<sub>3</sub> [M + Na]<sup>+</sup> 391.1428; found: 391.1436.

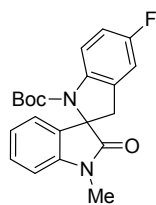

**Tert-butyl 5'-fluoro-1-methyl-2-oxo-2,3'-spirobi[indoline]-1'-carboxylate 3s:**

White solid; 58.2 mg, yield 79%; mp 191.8-192.8 °C. <sup>1</sup>H NMR (400 MHz, CDCl<sub>3</sub>): δ 1.11 (s, 9H), 3.18 (d, *J* = 16.4 Hz, 1H), 3.24 (s, 3H), 3.62 (d, *J* = 16.4 Hz, 1H), 6.84-6.87 (m, 2H), 6.92-6.96 (m, 1H), 7.00-7.04 (m, 1H), 7.11 (d, *J* = 7.2 Hz, 1H), 7.31-7.35 (m, 1H), 7.91-7.94 (m, 1H); <sup>13</sup>C NMR (100 MHz, CDCl<sub>3</sub>): δ 26.6, 27.9, 41.3, 69.1, 81.7, 108.2, 111.8 (d, *J* = 24.4 Hz, 1C), 114.3 (d, *J* = 22.7 Hz, 1C), 115.7 (d, *J* = 8.1 Hz, 1C), 121.8, 123.3, 128.8 (d, *J* = 8.6 Hz, 1C), 129.4, 132.2, 139.4, 142.7, 151.0, 159.2 (d, *J* = 239.3 Hz, 1C), 176.4. HRMS (ESI-TOF) calcd. for C<sub>21</sub>H<sub>21</sub>FN<sub>2</sub>NaO<sub>3</sub> [M + Na]<sup>+</sup> 391.1428; found: 391.1441.

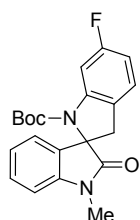

**Tert-butyl 6'-fluoro-1-methyl-2-oxo-2,3'-spirobi[indoline]-1'-carboxylate 3t:**

Yellow oil; 58.2 mg, yield 79%. <sup>1</sup>H NMR (400 MHz, CDCl<sub>3</sub>): δ 1.11 (s, 9H), 3.16 (d, *J* = 15.9 Hz, 1H), 3.24 (s, 3H), 3.58 (d, *J* = 15.9 Hz, 1H), 6.67-6.72 (m, 1H), 6.85 (d, *J* = 7.7 Hz, 1H), 7.00-7.06 (m, 2H), 7.11 (d, *J* = 7.2 Hz, 1H), 7.31-7.34 (m, 1H), 7.74 (d, *J* = 10.2 Hz, 1H); <sup>13</sup>C NMR (100 MHz, CDCl<sub>3</sub>): δ 26.6, 27.8, 40.8, 69.6, 82.0, 103.5 (d, *J* = 29.6 Hz, 1C), 108.2, 109.4 (d, *J* = 22.8 Hz, 1C), 121.8, 122.3, 123.3, 124.8 (d, *J* = 9.9 Hz, 1C), 129.4, 132.2, 142.7, 144.7 (d, *J* = 12.3 Hz, 1C), 150.9, 163.1 (d, *J* = 241.0 Hz, 1C), 176.3. HRMS (ESI-TOF) calcd. for C<sub>21</sub>H<sub>21</sub>FN<sub>2</sub>NaO<sub>3</sub> [M + Na]<sup>+</sup> 391.1428; found: 391.1437.

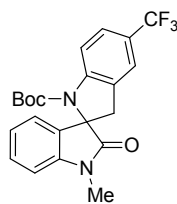

**Tert-butyl 1-methyl-2-oxo-5'-(trifluoromethyl)-2,3'-spirobi[indoline]-1'-car-**

**boxylate 3u:** Yellow solid; 52.0 mg, yield 62%; mp 169.7-170.8 °C. <sup>1</sup>H NMR

(400 MHz, CDCl<sub>3</sub>): δ 1.13 (s, 9H), 3.26 (s, 3H), 3.26 (d, *J* = 16.4 Hz, 1H), 3.67 (d, *J* = 16.4 Hz, 1H), 6.87 (d, *J* = 7.7 Hz, 1H), 7.01-7.05 (m, 1H), 7.11 (d, *J* = 7.1 Hz, 1H), 7.32-7.36 (m, 1H), 7.39 (s, 1H), 7.53 (d, *J* = 8.4 Hz, 1H), 8.06 (d, *J* = 8.2 Hz, 1H);

$^{13}\text{C}$  NMR (100 MHz,  $\text{CDCl}_3$ ):  $\delta$  26.6, 27.8, 41.1, 69.1, 82.3, 108.4, 114.8, 121.6, 121.7, 123.4, 124.5 (q,  $J = 270.0$  Hz, 1C), 125.0 (q,  $J = 32.0$  Hz, 1C), 125.8 (q,  $J = 4.0$  Hz, 1C), 127.9, 129.6, 131.9, 142.8, 146.3, 150.8, 176.1. HRMS (ESI-TOF) calcd. for  $\text{C}_{22}\text{H}_{22}\text{F}_3\text{N}_2\text{O}_3$   $[\text{M} + \text{H}]^+$  419.1577; found: 419.1573.

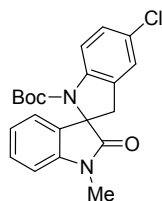

**Tert-butyl 5'-chloro-1-methyl-2-oxo-2,3'-spirobi[indoline]-1'-carboxylate 3v:**

White solid; 56.5 mg, yield 74%; mp 190.9-192.8 °C.  $^1\text{H}$  NMR (400 MHz,  $\text{CDCl}_3$ ):  $\delta$  1.11 (s, 9H), 3.18 (d,  $J = 16.4$  Hz, 1H), 3.24 (s, 3H), 3.62 (d,  $J = 16.3$  Hz, 1H), 6.85 (d,  $J = 7.7$  Hz, 1H), 7.00-7.04 (m, 1H), 7.09-7.12 (m, 2H), 7.22 (d,

$J = 8.7$  Hz, 1H), 7.31-7.35 (m, 1H), 7.91 (d,  $J = 8.6$  Hz, 1H);  $^{13}\text{C}$  NMR (100 MHz,  $\text{CDCl}_3$ ):  $\delta$  26.7, 27.9, 41.2, 69.0, 81.9, 108.3, 116.0, 121.8, 123.4, 124.6, 128.0, 128.1, 129.0, 129.5, 132.1, 142.1, 142.8, 150.9, 176.3. HRMS (ESI-TOF) calcd. for  $\text{C}_{21}\text{H}_{21}\text{ClN}_2\text{NaO}_3$   $[\text{M} + \text{Na}]^+$  407.1133; found: 407.1141.

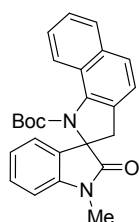

**Tert-butyl 1'-methyl-2'-oxospiro[benzo[g]indole-2,3'-indoline]-1(3H)-carboxylate 3w:**

Yellow oil; 44.1 mg, yield 55%.  $^1\text{H}$  NMR (400 MHz,  $\text{CDCl}_3$ ):  $\delta$  1.28 (s, 9H), 3.27 (d,  $J = 16.0$  Hz, 1H), 3.31 (s, 3H), 3.92 (d,  $J = 16.0$  Hz, 1H), 6.88 (d,  $J = 7.8$  Hz, 1H), 6.94-6.98 (m, 1H), 7.06 (d,  $J = 7.4$  Hz, 1H), 7.29-7.34 (m, 2H), 7.43-

7.48 (m, 2H), 7.64 (d,  $J = 8.2$  Hz, 1H), 7.84 (d,  $J = 7.4$  Hz, 1H), 8.04 (d,  $J = 7.6$  Hz, 1H);  $^{13}\text{C}$  NMR (100 MHz,  $\text{CDCl}_3$ ):  $\delta$  26.7, 27.8, 43.0, 70.6, 82.0, 108.2, 122.1, 123.2, 123.3, 124.9, 125.2, 125.3, 125.5, 125.6, 128.4, 129.4, 132.6, 134.6, 138.4, 142.5, 152.0, 176.3. HRMS (ESI-TOF) calcd. for  $\text{C}_{25}\text{H}_{24}\text{N}_2\text{NaO}_3$   $[\text{M} + \text{Na}]^+$  423.1679; found: 423.1697.

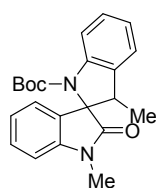

**Tert-butyl 1,3'-dimethyl-2-oxo-2,3'-spirobi[indoline]-1'-carboxylate 3x:**

Yellow oil; 48.1 mg, yield 66%, dr 4:1.  $^1\text{H}$  NMR (400 MHz,  $\text{CDCl}_3$ ):  $\delta$  (major) 0.93 (d,  $J = 7.1$  Hz, 3H), 1.13 (s, 9H), 3.25 (s, 3H), 3.90 (q,  $J = 6.9$  Hz, 1H), 6.84-6.95 (m, 3H), 7.01-7.10 (m, 2H), 7.20-7.23 (m, 1H), 7.28-7.32 (m, 1H), 7.97 (d,  $J = 7.8$  Hz, 1H);  $^{13}\text{C}$  NMR (100 MHz,  $\text{CDCl}_3$ ):  $\delta$  (major) 13.3, 26.7, 27.8, 45.1, 74.3, 81.4, 108.0,

114.8, 122.6, 122.8, 123.0, 123.3, 128.9, 129.4, 131.0, 132.7, 142.8, 143.2, 151.2, 177.1. HRMS (ESI-TOF) calcd. for  $\text{C}_{22}\text{H}_{24}\text{N}_2\text{NaO}_3$   $[\text{M} + \text{Na}]^+$  387.1679; found: 387.1681.

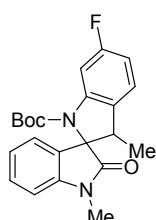

**Tert-butyl 6'-fluoro-1,3'-dimethyl-2-oxo-2,3'-spirobi[indoline]-1'-carboxylate 3y:**

Yellow solid; 39.8 mg, yield 52%, dr 2:1; mp 108.7-110.2 °C.  $^1\text{H}$  NMR (400 MHz,  $\text{CDCl}_3$ ):  $\delta$  (major + minor) 0.91 (d,  $J = 7.0$  Hz, 3H), 1.12 (s, 9H), 3.21 (s,



1H), 3.25 (s, 2H), 3.84 (q,  $J = 7.1$  Hz, 1H), 6.69-6.73 (m, 1H), 6.82-6.90 (m, 2H), 6.94-7.01 (m, 2H), 7.30-7.34 (m, 1H), 7.74 (d,  $J = 10.2$  Hz, 1H);  $^{13}\text{C}$  NMR (100 MHz,  $\text{CDCl}_3$ ):  $\delta$  (major + minor) 13.5, 14.5, 26.7, 27.8, 44.6, 74.2, 74.9, 82.0, 103.2 (d,  $J = 29.5$  Hz, 1C), 103.3 (d,  $J = 29.4$  Hz, 1C), 108.1, 109.3 (d,  $J = 22.8$  Hz, 1C), 122.1, 122.7, 123.2, 123.3, 123.4, 127.5, 128.1, 129.1, 129.6, 143.2, 143.4, 144.1, 144.2, 151.0, 151.2, 163.2 (d,  $J = 241.2$  Hz, 1C), 173.9, 176.7. HRMS (ESI-TOF) calcd. for  $\text{C}_{22}\text{H}_{23}\text{FN}_2\text{NaO}_3$   $[\text{M} + \text{Na}]^+$  405.1585; found: 405.1592.

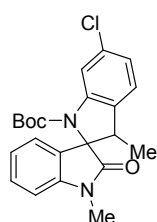

**Tert-butyl 6'-chloro-1,3'-dimethyl-2-oxo-2,3'-spirobi[indoline]-1'-carboxylate**

**3z:** White solid; 55.8 mg, yield 70%, dr 3:1; mp 79.3-81.2 °C.  $^1\text{H}$  NMR (400 MHz,

$\text{CDCl}_3$ ):  $\delta$  (major + minor) 0.91 (d,  $J = 7.1$  Hz, 3H), 1.12 (s, 9H), 3.20 (s, 0.75H),

3.25 (s, 2.25H), 3.84 (q,  $J = 7.0$  Hz, 1H), 6.84-6.89 (m, 2H), 6.93-6.99 (m, 3H),

7.30-7.33 (m, 1H), 8.02 (s, 1H);  $^{13}\text{C}$  NMR (100 MHz,  $\text{CDCl}_3$ ):  $\delta$  (major + minor) 13.4, 14.3, 26.7, 27.8, 44.7, 74.0, 74.6, 82.0, 108.2, 115.2, 115.3, 122.0, 122.7, 122.9, 123.0, 123.2, 123.3, 123.6, 127.4, 129.2, 129.6, 131.3, 134.0, 143.2, 143.4, 143.9, 151.0, 173.8, 176.7. HRMS (ESI-TOF) calcd. for  $\text{C}_{22}\text{H}_{23}\text{ClN}_2\text{NaO}_3$   $[\text{M} + \text{Na}]^+$  421.1289; found: 421.1297.

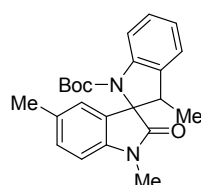

**Tert-butyl 1,3',5-trimethyl-2-oxo-2,3'-spirobi[indoline]-1'-carboxylate 3a':**

Yellow solid; 52.2 mg, yield 69%, dr 3:1; mp 86.6-88.1 °C.  $^1\text{H}$  NMR (400

MHz,  $\text{CDCl}_3$ ):  $\delta$  (major + minor) 0.93 (d,  $J = 7.0$  Hz, 3H), 1.13 (s, 9H), 2.20

(s, 2.25H), 2.29 (s, 0.75H), 3.18 (s, 0.75H), 3.23 (s, 2.25H), 3.89 (q,  $J = 6.8$

Hz, 1H), 6.68 (s, 1H), 6.73 (d,  $J = 8.0$  Hz, 1H), 7.04 (d,  $J = 9.0$  Hz, 1H), 7.10 (d,  $J = 6.7$  Hz, 2H), 7.23 (d,  $J = 7.4$  Hz, 1H), 7.98 (d,  $J = 7.6$  Hz, 1H);  $^{13}\text{C}$  NMR (100 MHz,  $\text{CDCl}_3$ ):  $\delta$  (major + minor) 13.3, 14.7, 21.0, 26.7, 27.8, 45.1, 73.5, 74.4, 81.4, 107.8, 114.6, 114.8, 122.7, 122.8, 123.0, 123.9, 127.8, 128.2, 129.0, 129.6, 132.2, 132.8, 140.8, 141.0, 142.9, 151.3, 174.0, 177.1. HRMS (ESI-TOF) calcd. for  $\text{C}_{23}\text{H}_{26}\text{N}_2\text{NaO}_3$   $[\text{M} + \text{Na}]^+$  401.1836; found: 401.1842.

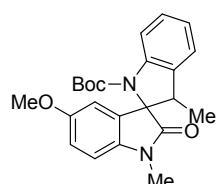

**Tert-butyl 5-methoxy-1,3'-dimethyl-2-oxo-2,3'-spirobi[indoline]-1'-carbo-**

**-xylate 3b':** Yellow oil; 49.7 mg, yield 63%, dr 4:1.  $^1\text{H}$  NMR (400 MHz,

$\text{CDCl}_3$ ):  $\delta$  (major) 0.95 (d,  $J = 7.3$  Hz, 3H), 1.15 (s, 9H), 3.23 (s, 3H), 3.67 (s,

3H), 3.90 (q,  $J = 6.8$  Hz, 1H), 6.49 (s, 1H), 6.75 (d,  $J = 8.9$  Hz, 1H), 6.83 (d,

$J = 9.7$  Hz, 1H), 7.03 (d,  $J = 7.1$  Hz, 1H), 7.09 (d,  $J = 7.0$  Hz, 1H), 7.23 (d,  $J = 7.5$  Hz, 1H), 7.96 (d,  $J = 7.6$  Hz, 1H);  $^{13}\text{C}$  NMR (100 MHz,  $\text{CDCl}_3$ ):  $\delta$  (major) 13.3, 26.7, 27.9, 45.1, 56.0, 74.6, 81.5, 108.3, 110.9, 113.4, 114.8, 122.9, 123.1, 128.3, 128.9, 131.0, 136.8, 142.8, 151.2, 156.0,

176.8. HRMS (ESI-TOF) calcd. for  $C_{23}H_{26}N_2NaO_4$   $[M + Na]^+$  417.1785; found: 417.1779.

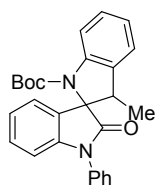

**Tert-butyl 3'-methyl-2-oxo-1-phenyl-2,3'-spirobi[indoline]-1'-carboxylate 3c':**

Yellow solid; 41.8 mg, yield 49%, dr 3:1; mp 107.3-108.8 °C.  $^1H$  NMR (400 MHz,  $CDCl_3$ ):  $\delta$  (major) 1.06 (d,  $J = 7.0$  Hz, 3H), 1.19 (s, 9H), 3.99 (q,  $J = 7.0$  Hz, 1H), 6.94-6.98 (m, 1H), 7.02-7.08 (m, 2H), 7.09-7.14 (m, 2H), 7.40-7.41 (m, 1H), 7.48-

7.57 (m, 6H), 8.01-8.05 (m, 1H);  $^{13}C$  NMR (100 MHz,  $CDCl_3$ ):  $\delta$  (major) 13.8, 28.1, 46.2, 74.5, 82.0, 109.4, 109.7, 114.7, 114.9, 122.9, 123.6, 125.5, 127.9, 128.7, 129.2, 129.6, 129.7, 132.4, 133.1, 142.5, 143.0, 151.4, 176.2. HRMS (ESI-TOF) calcd. for  $C_{27}H_{26}N_2NaO_3$   $[M + Na]^+$  449.1836; found: 449.1839.

### 3. Control experiments

In a 5 mL of flame-dried vial with a stir bar, the mixture of 3-aminooxindole **1a** (0.2 mmol, 52.5 mg), 2-bromobenzyl bromide **2a** (0.22 mmol, 55.0 mg, 1.1 equiv.),  $tBuONa$  (0.8 mmol, 76.8 mg, 4.0 equiv.) in 2.0 mL of DMF was stirred at 50 °C for 6 h. After completion of the reaction indicated by TLC,  $CuBr$  (0.01 mmol, 1.4 mg) was added into the mixture and the resulting solution was continually stirred at 100°C for 16 h. Then 10.0 mL of water was added into the mixture and the solution was extracted with EtOAc ( $6 \times 5$  mL). The combined organic layers were dried over anhydrous  $Na_2SO_4$ , filtered, concentrated, and the residue was purified by flash column chromatography on silica gel (petroleum ether/ethyl acetate = 5:1) to afford compound **3a** with 82% yield (57.5 mg). It was emphasized that the non-cyclic intermediate **4** could be isolated and the characterized data was listed as follows.

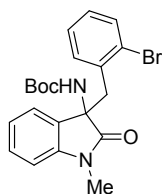

**Tert-butyl (3-(2-bromobenzyl)-1-methyl-2-oxoindolin-3-yl)carbamate 4:**

White solid; 59.5 mg, yield 69%; mp 143.8-145.3 °C;  $^1H$  NMR (400 MHz,  $CDCl_3$ ),  $\delta$  1.19-1.25 (m, 9H), 3.14 (d,  $J = 13.5$  Hz, 1H), 3.16 (s, 3H), 3.51 (d,  $J = 13.5$  Hz, 1H), 5.54 (s, 1H), 6.69 (d,  $J = 7.7$  Hz, 1H), 6.94-7.08 (m, 4H), 7.14-7.17

(m, 1H), 7.21-7.25 (m, 1H), 7.44 (d,  $J = 7.9$  Hz, 1H);  $^{13}C$  NMR (100 MHz,  $CDCl_3$ ),  $\delta$  26.5, 28.1, 41.8, 62.9, 80.5, 107.8, 122.2, 124.4, 125.9, 127.0, 128.9, 129.2, 132.4, 133.1, 133.5, 143.1, 153.9, 176.7. HRMS (ESI-TOF) calcd. for  $C_{21}H_{23}BrN_2NaO_3$   $[M + Na]^+$ : 453.0784; found: 453.0824.

### 4. Crystallographic information for compound 3j

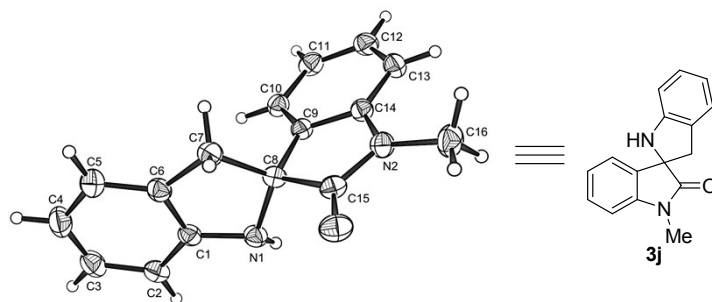

| Compound <b>3j</b>                          | Data                                                          |
|---------------------------------------------|---------------------------------------------------------------|
| Empirical formula                           | C <sub>16</sub> H <sub>14</sub> N <sub>2</sub> O              |
| Formula weight                              | 250.29                                                        |
| Temperature/K                               | 290(2)                                                        |
| Crystal system                              | monoclinic                                                    |
| Space group                                 | P21/c                                                         |
| a/Å                                         | 5.57110(10)                                                   |
| b/Å                                         | 14.4715(4)                                                    |
| c/Å                                         | 15.8198(5)                                                    |
| α/°                                         | 90                                                            |
| β/°                                         | 94.691(2)                                                     |
| γ/°                                         | 90                                                            |
| Volume/Å <sup>3</sup>                       | 1271.15(6)                                                    |
| Z                                           | 4                                                             |
| ρ <sub>calc</sub> /cm <sup>3</sup>          | 1.308                                                         |
| μ/mm <sup>-1</sup>                          | 0.660                                                         |
| F(000)                                      | 528.0                                                         |
| Crystal size/mm <sup>3</sup>                | 0.390 × 0.330 × 0.320                                         |
| Radiation                                   | CuKα (λ = 1.54184)                                            |
| 2θ range for data collection/°              | 8.294 to 140.08                                               |
| Index ranges                                | -4 ≤ h ≤ 6, -17 ≤ k ≤ 17, -19 ≤ l ≤ 19                        |
| Reflections collected                       | 5613                                                          |
| Independent reflections                     | 2369 [R <sub>int</sub> = 0.0166, R <sub>sigma</sub> = 0.0214] |
| Data/restraints/parameters                  | 2369/0/173                                                    |
| Goodness-of-fit on F <sup>2</sup>           | 1.047                                                         |
| Final R indexes [I >= 2σ (I)]               | R <sub>1</sub> = 0.0394, wR <sub>2</sub> = 0.1050             |
| Final R indexes [all data]                  | R <sub>1</sub> = 0.0437, wR <sub>2</sub> = 0.1104             |
| Largest diff. peak/hole / e Å <sup>-3</sup> | 0.19/-0.16                                                    |

## 5. NMR spectra for compounds 3 and 4

### $^1\text{H}$ and $^{13}\text{C}$ NMR of 3a

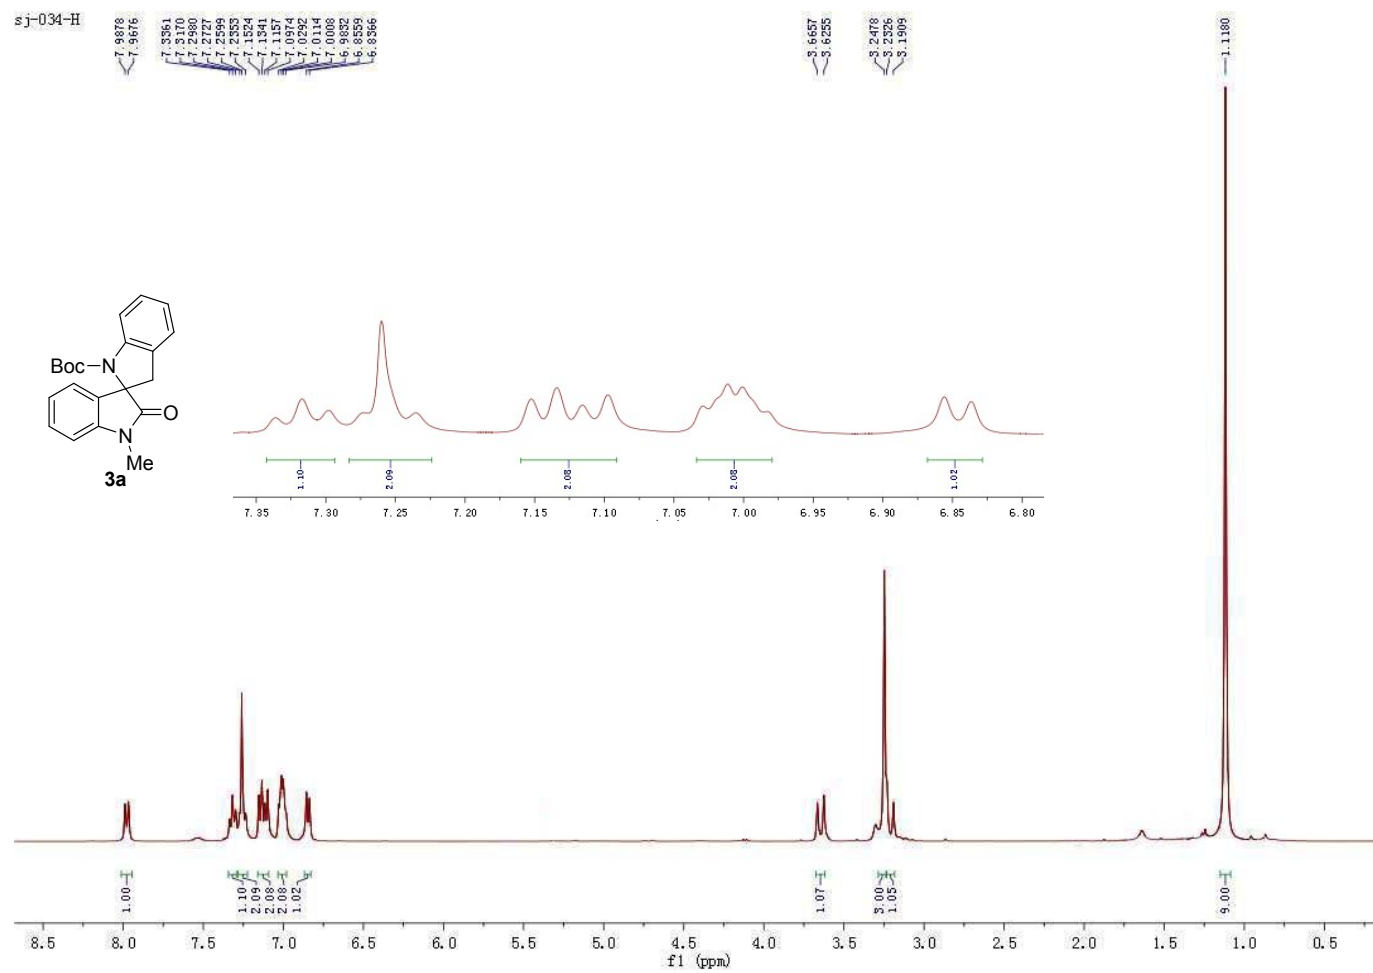

2  
34-C

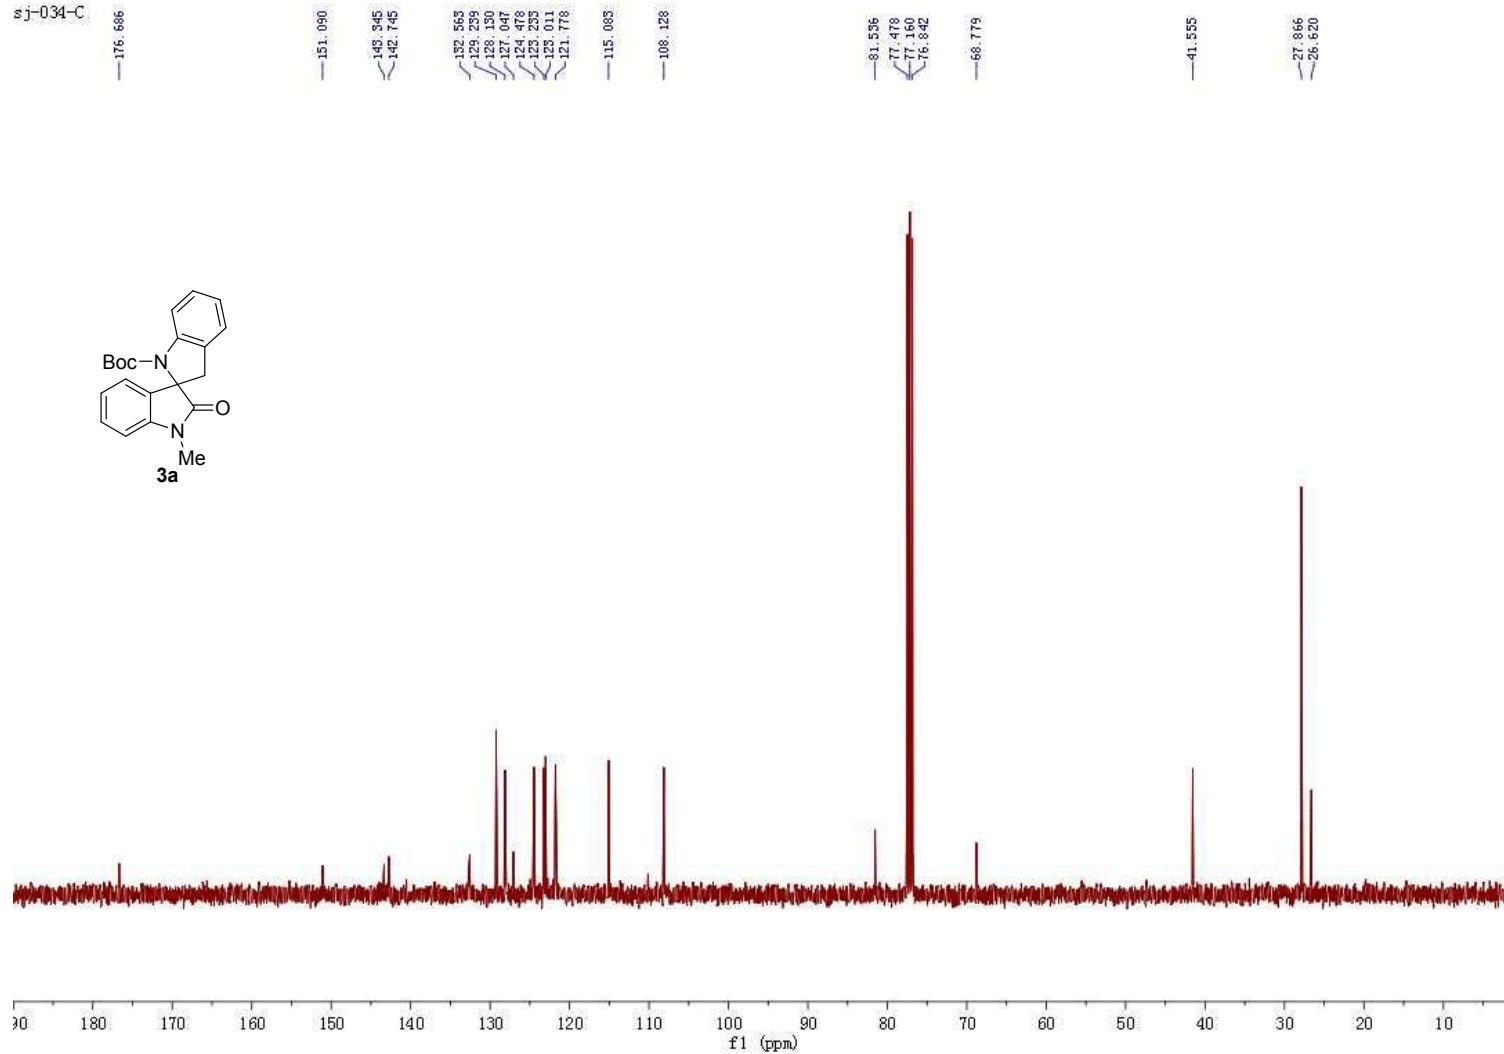

# <sup>1</sup>H and <sup>13</sup>C NMR of 3b

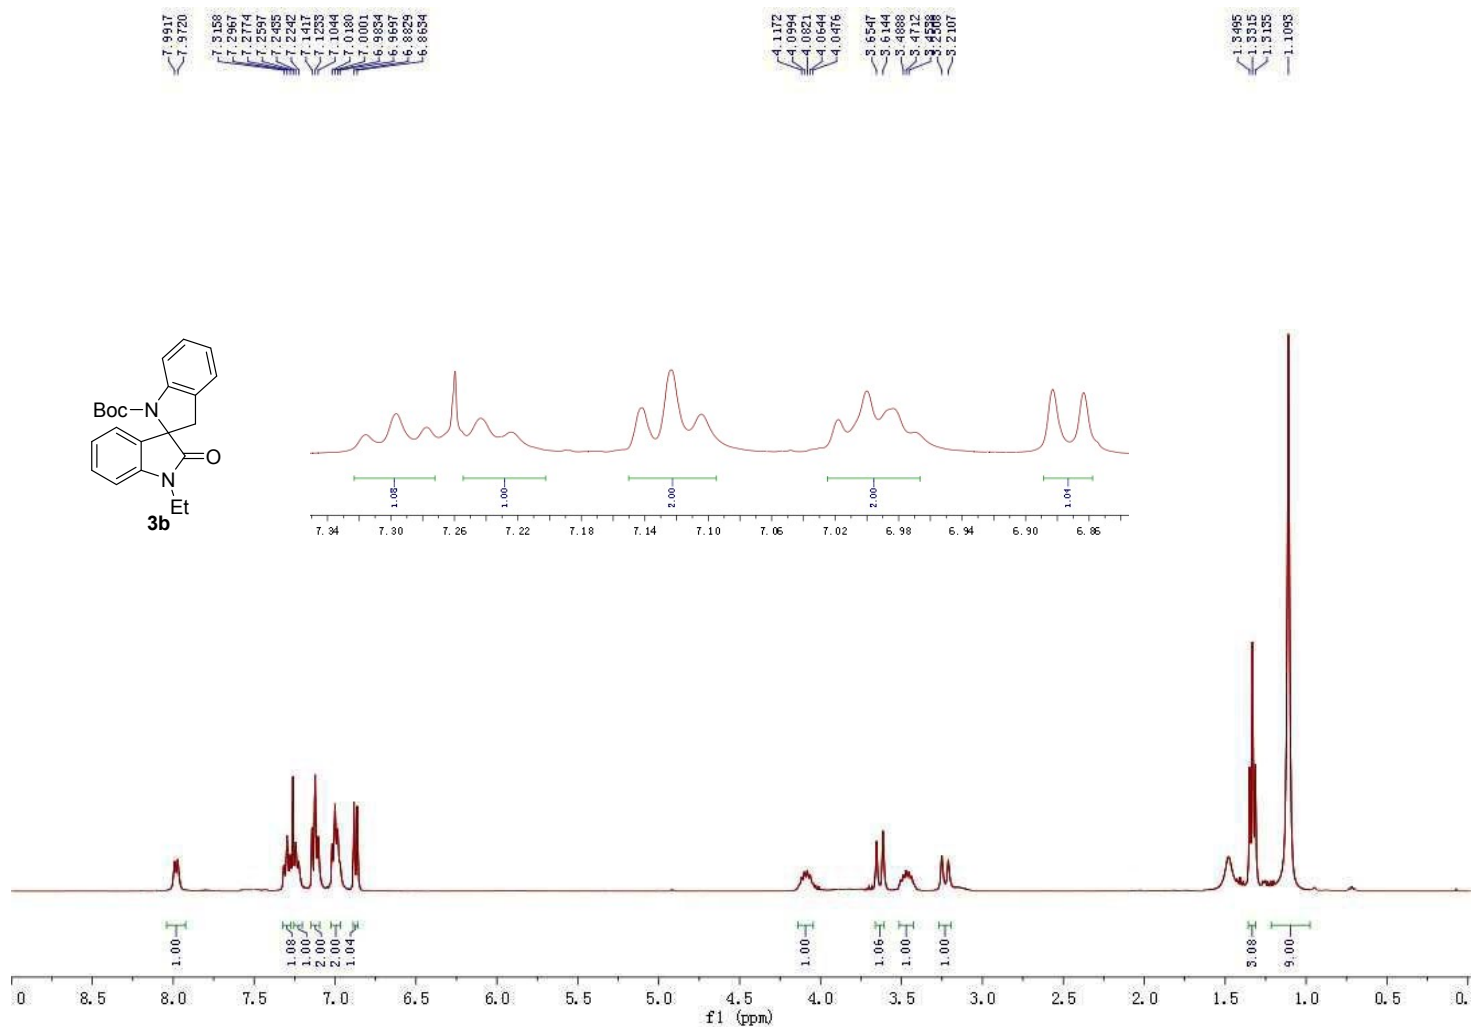

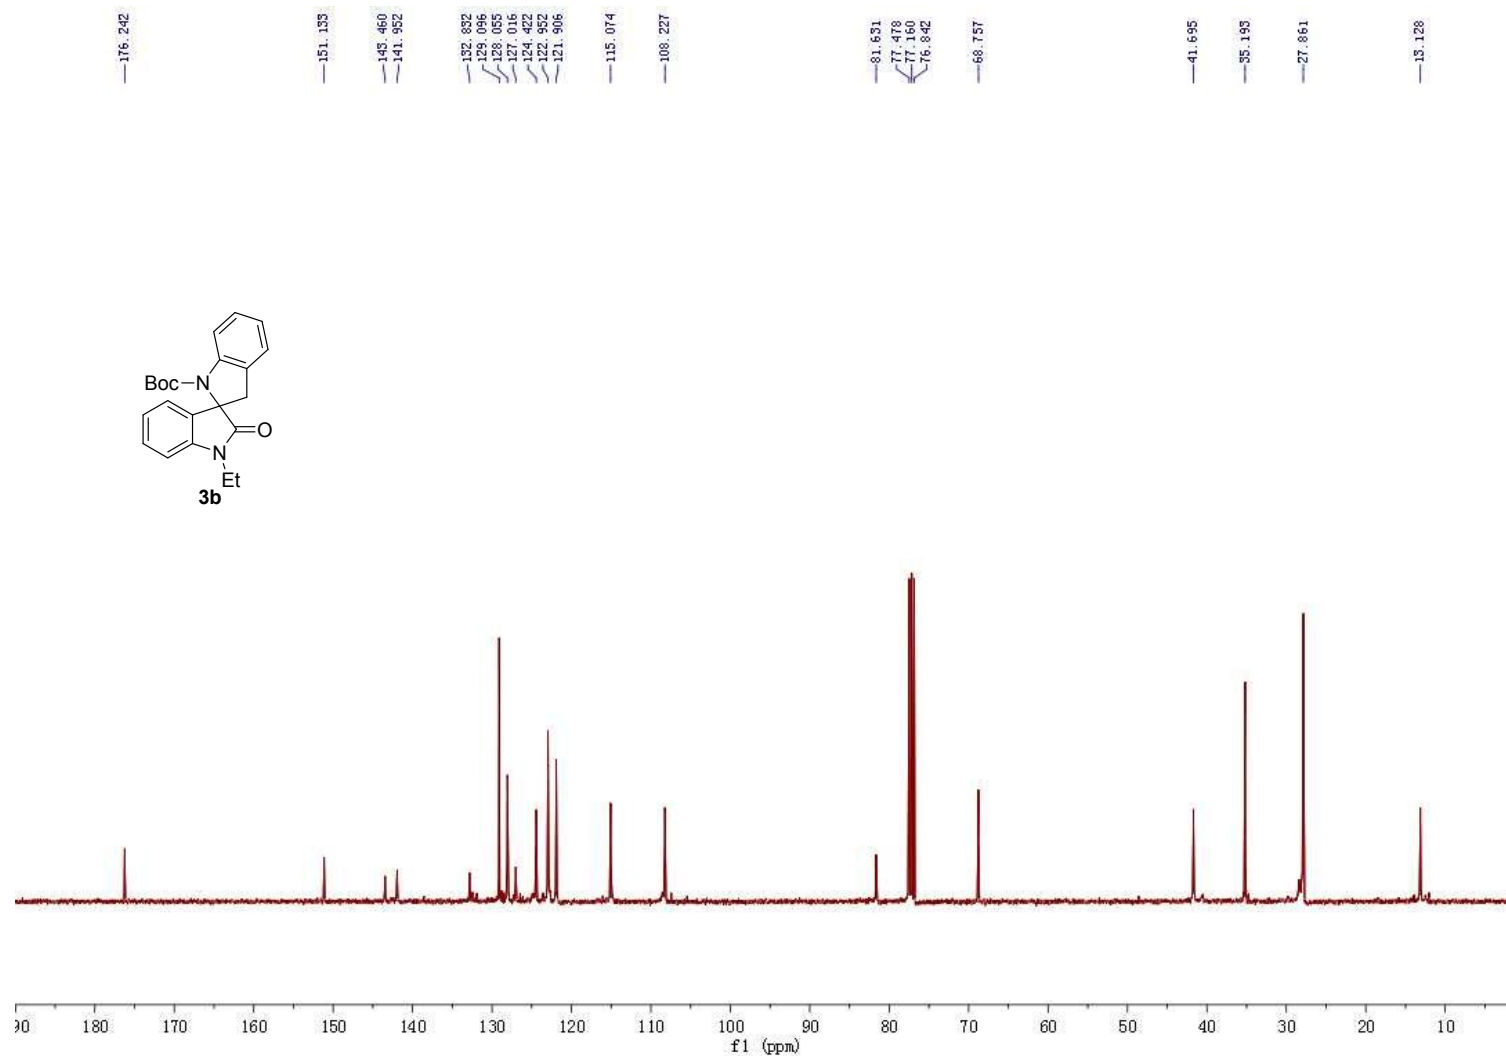

# <sup>1</sup>H and <sup>13</sup>C NMR of 3c

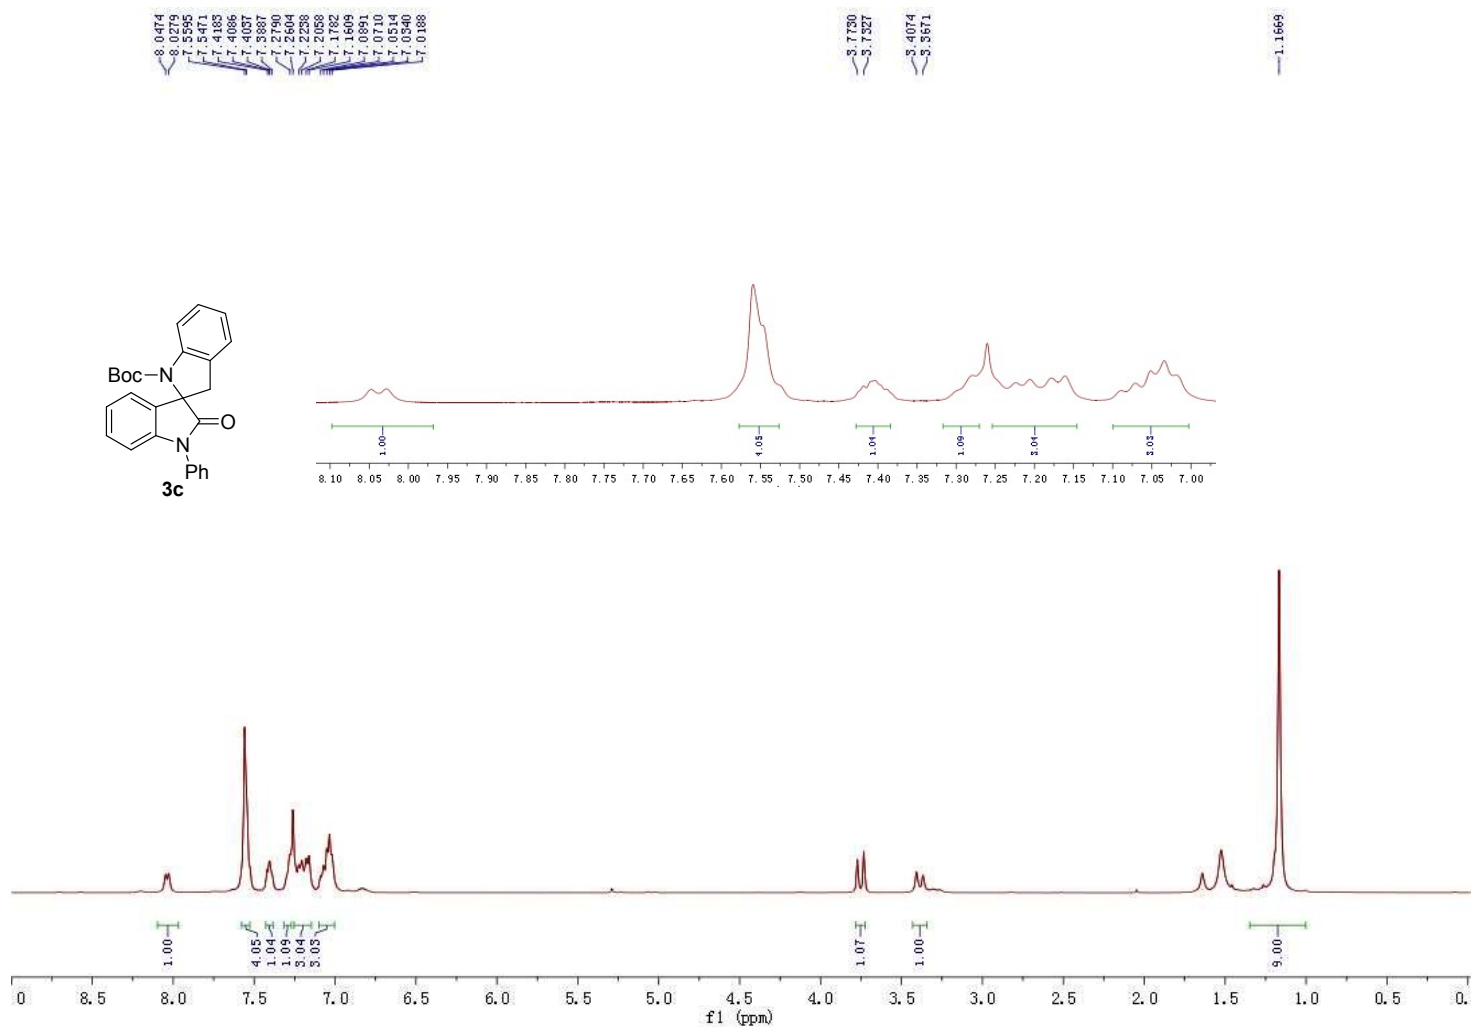



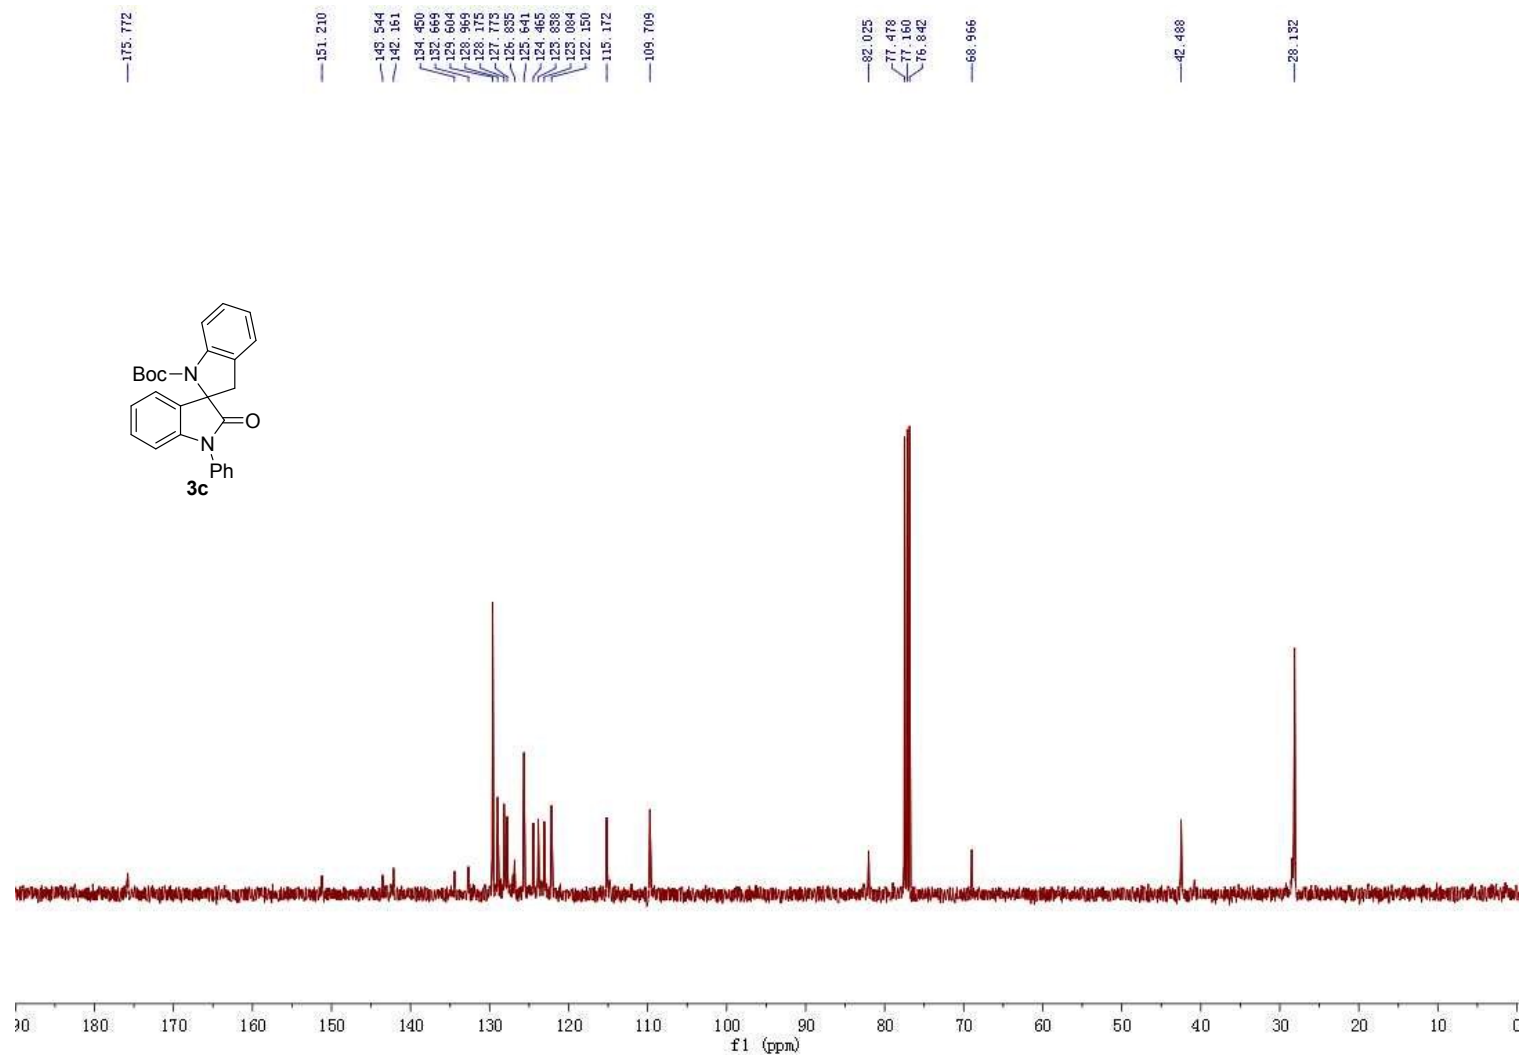

### <sup>1</sup>H and <sup>13</sup>C NMR of 3d

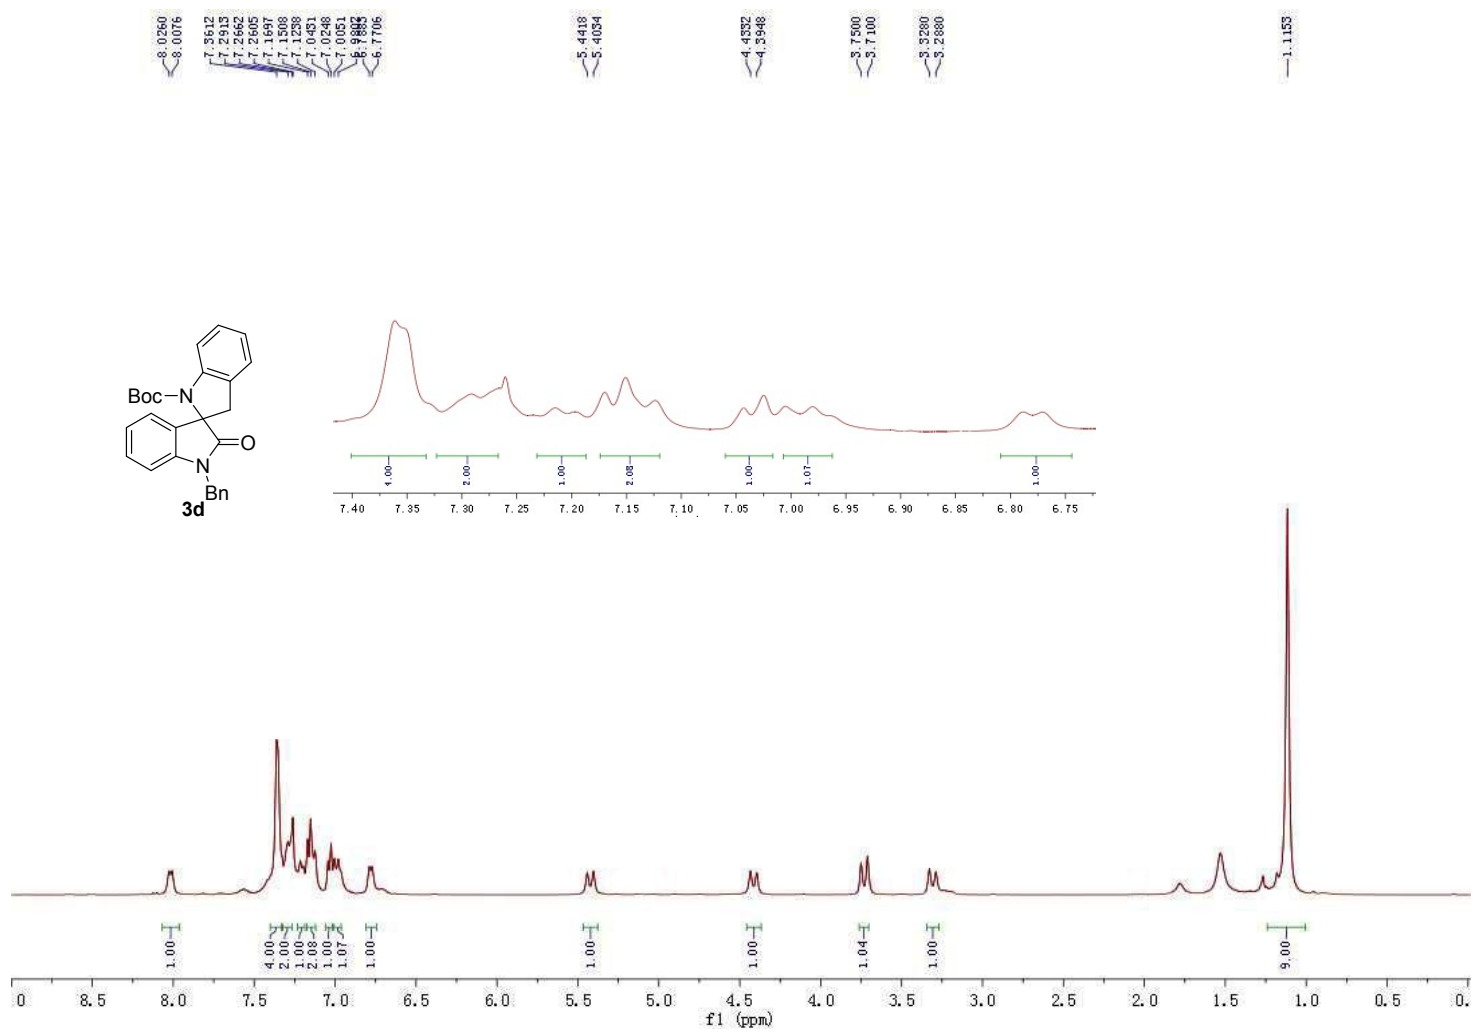

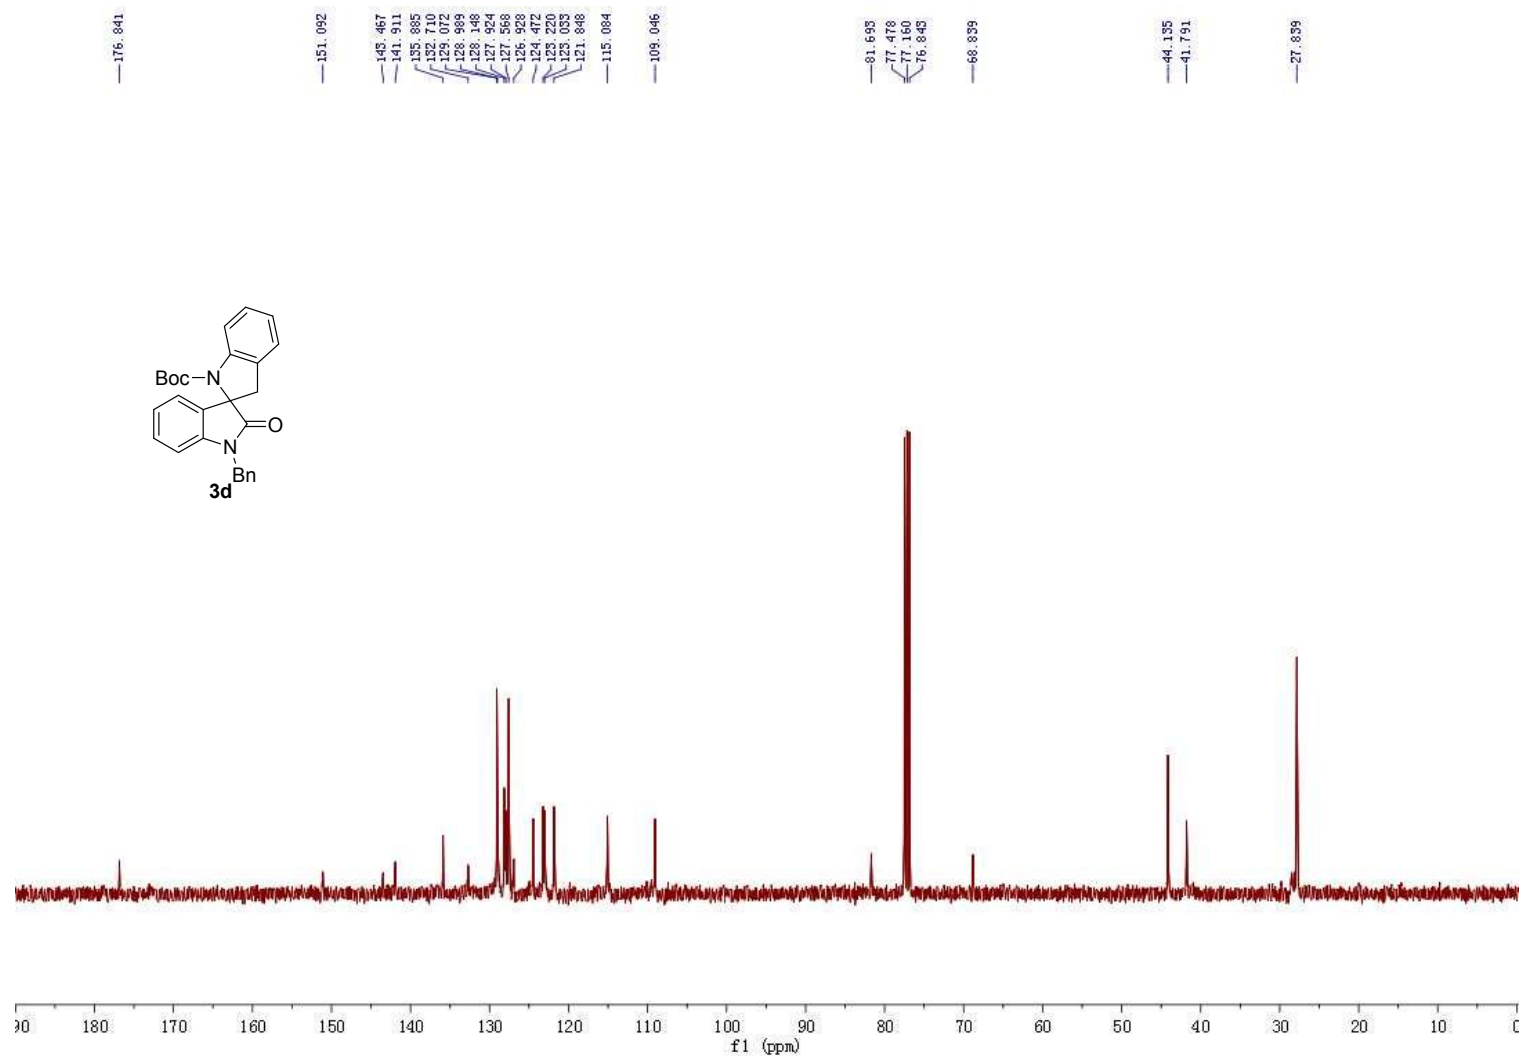

# <sup>1</sup>H and <sup>13</sup>C NMR of 3e

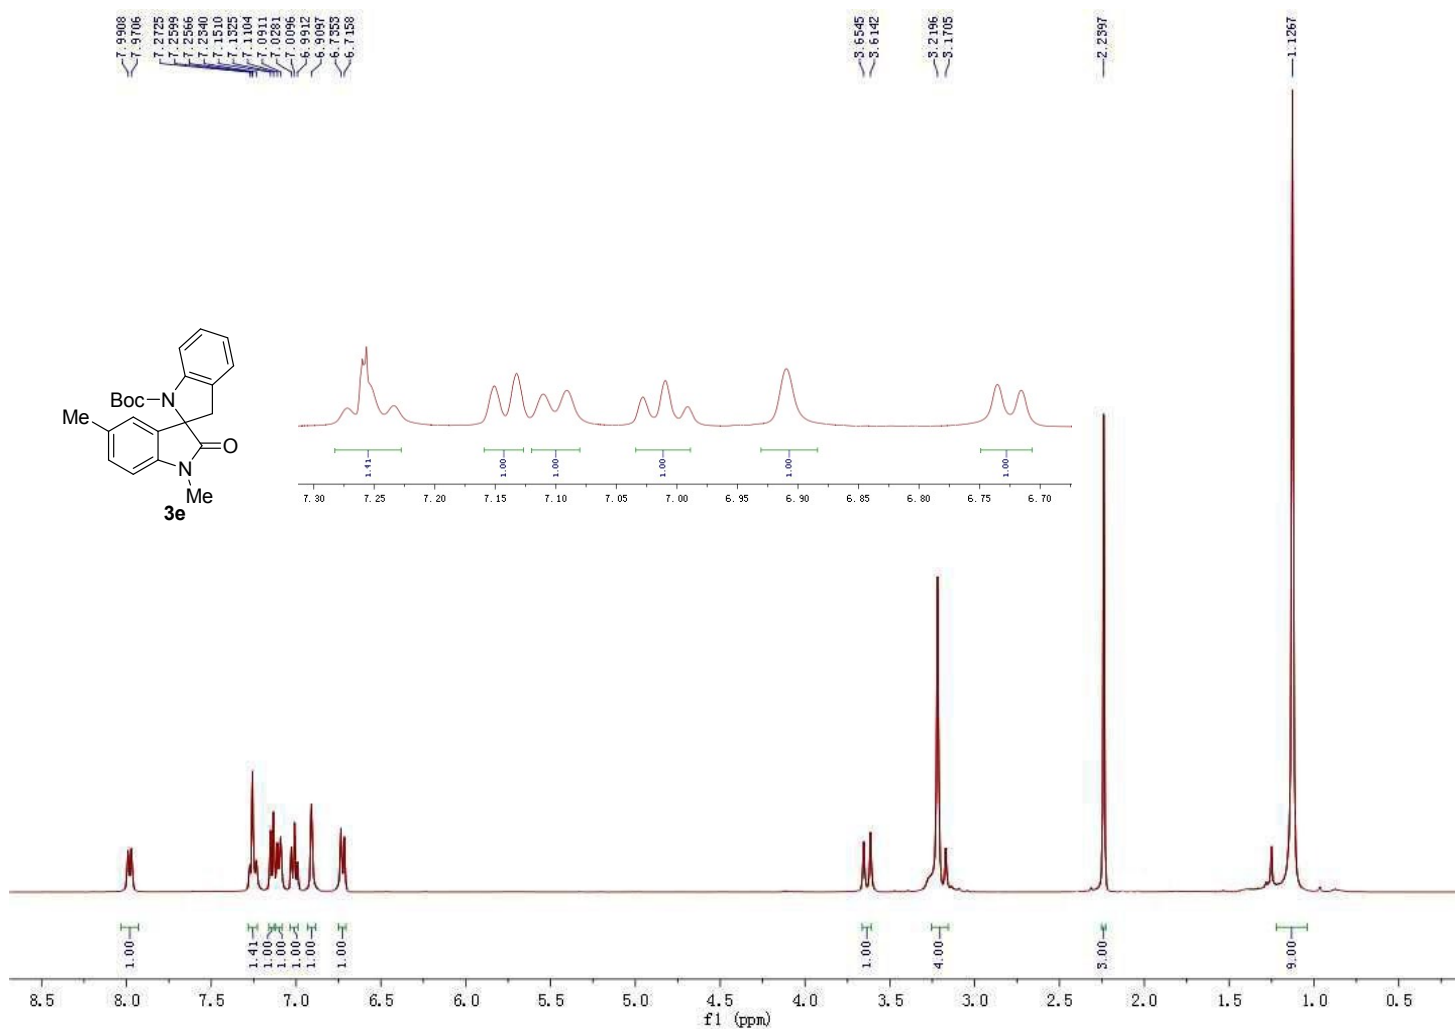

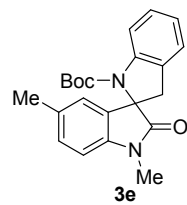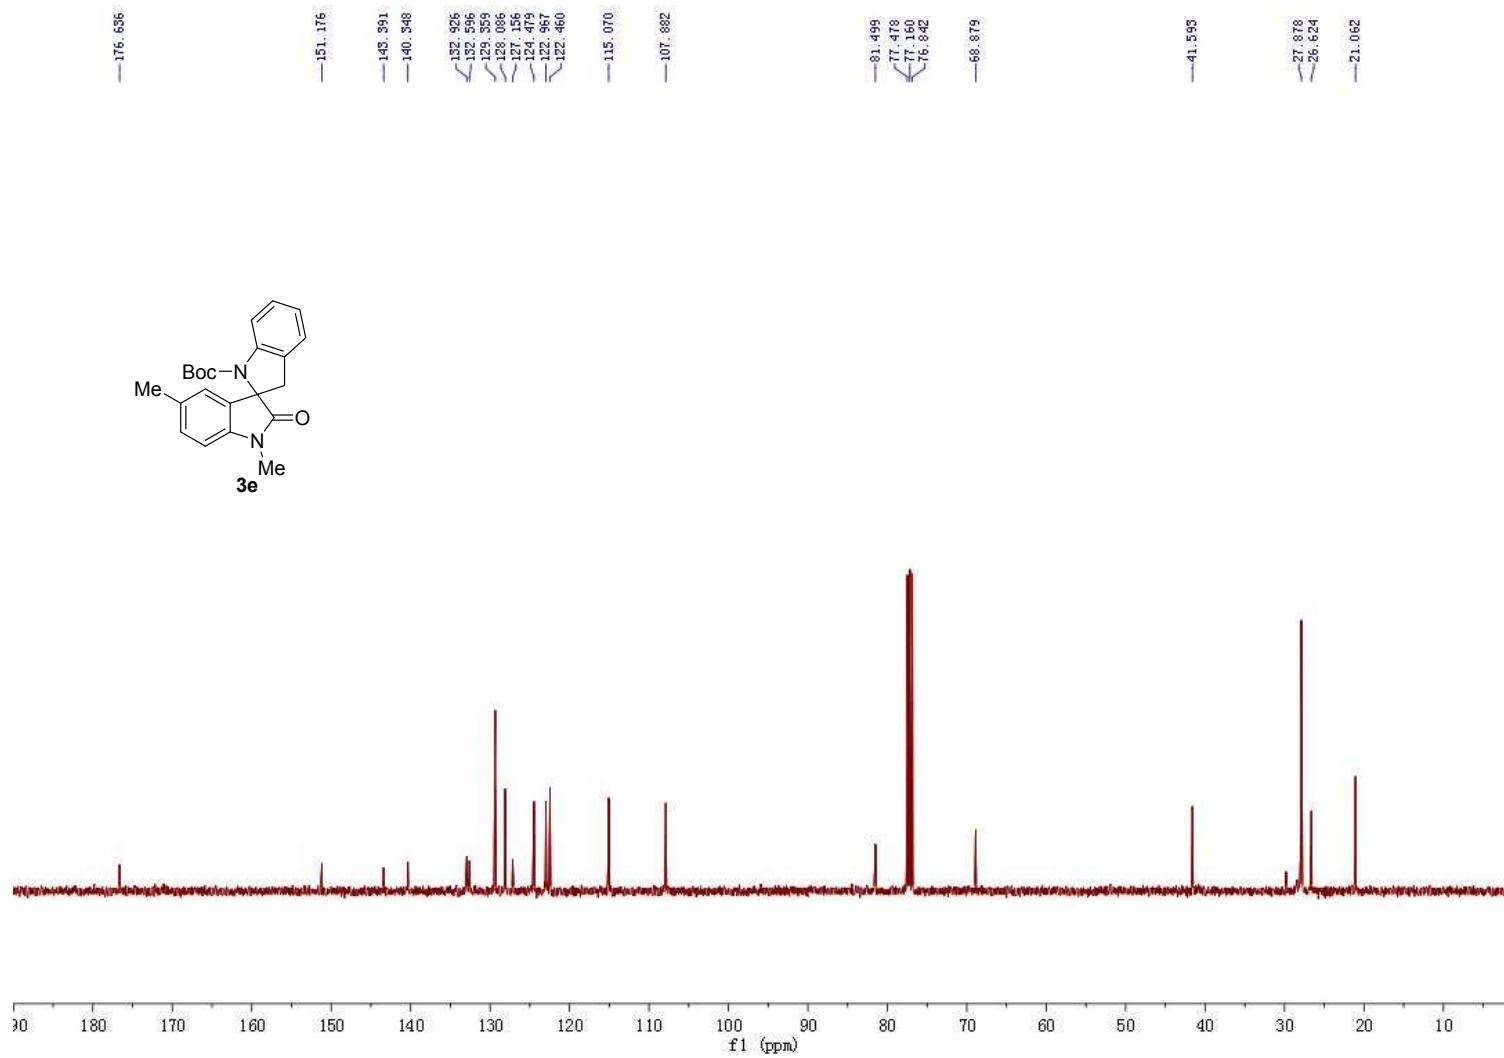

# <sup>1</sup>H and <sup>13</sup>C NMR of 3f

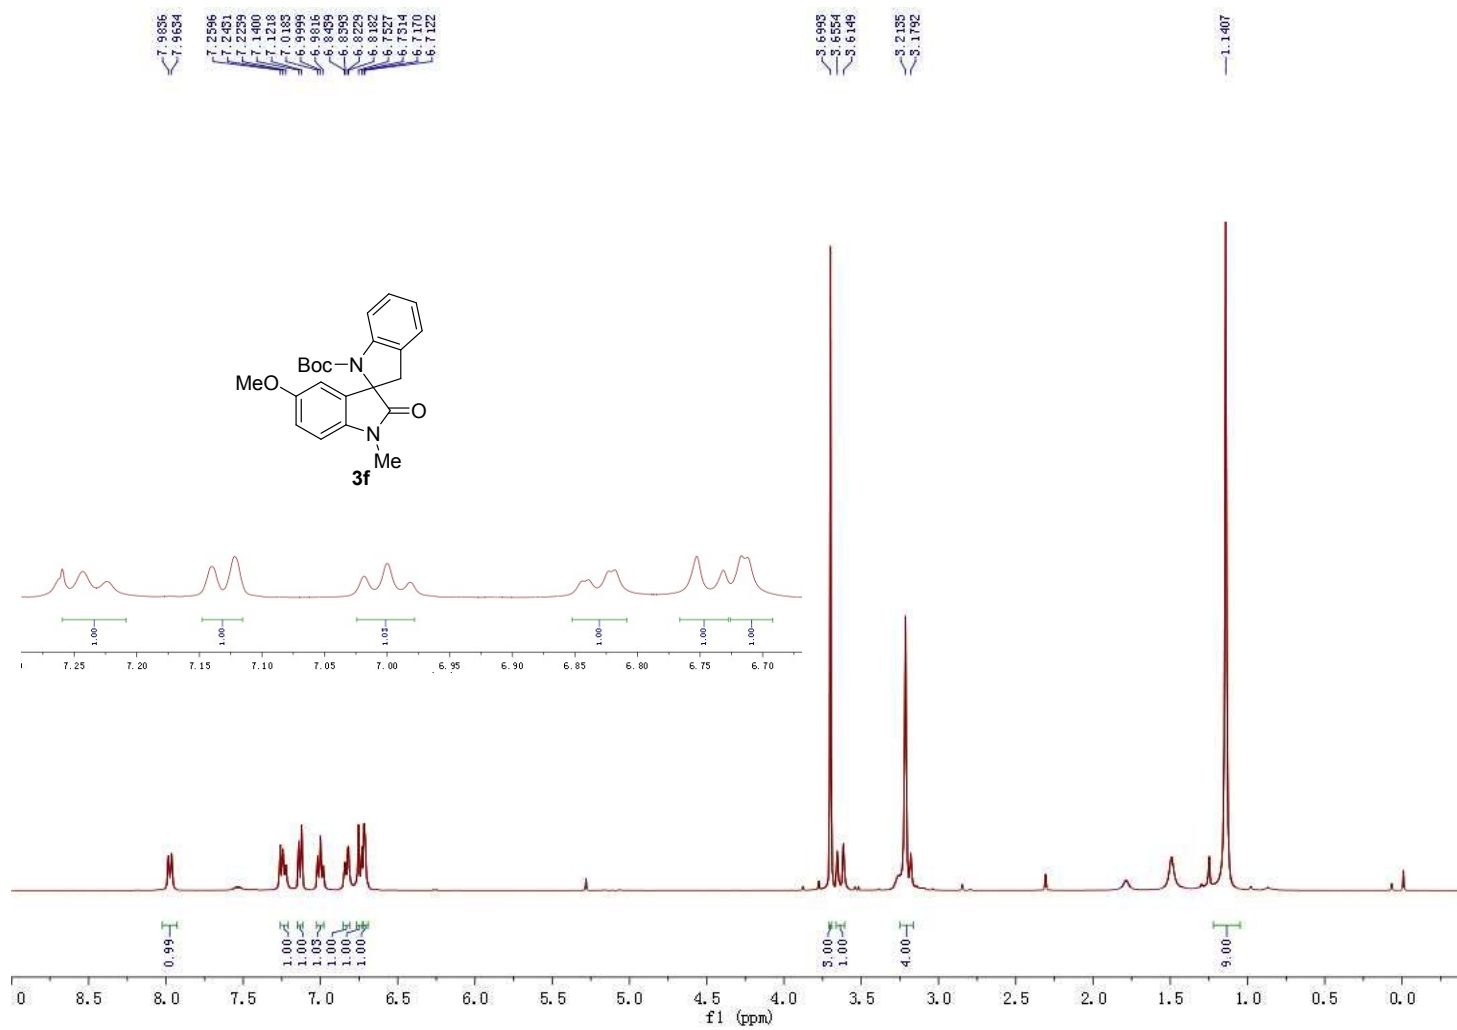

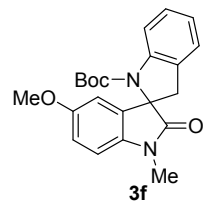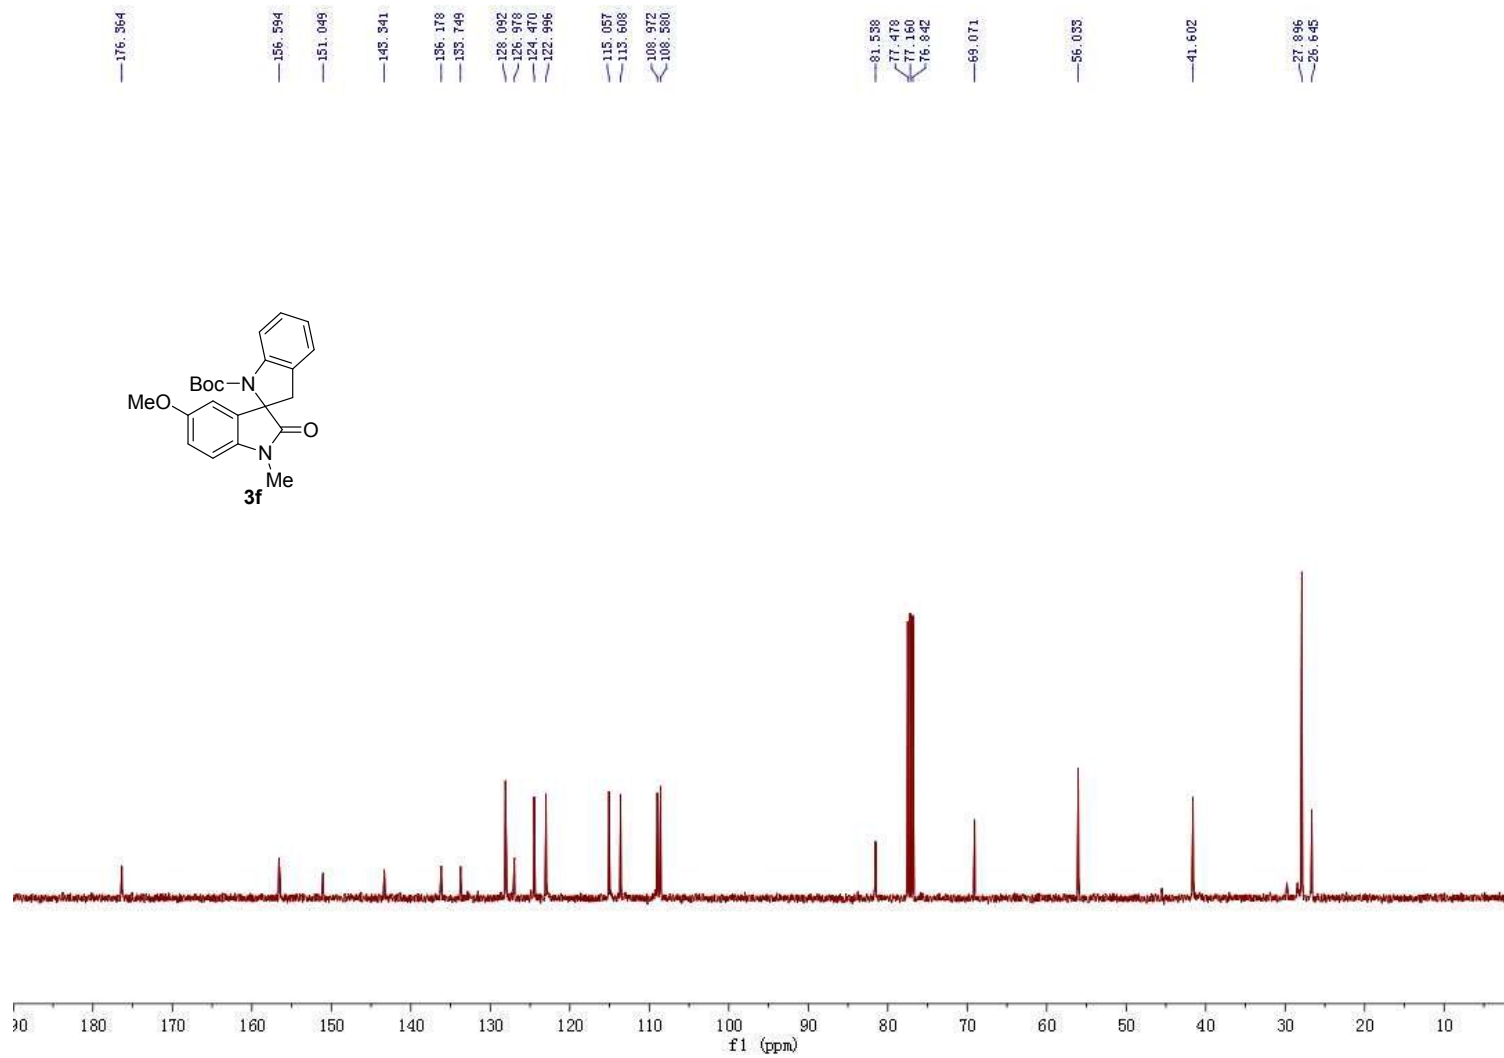

# <sup>1</sup>H and <sup>13</sup>C NMR of 3g

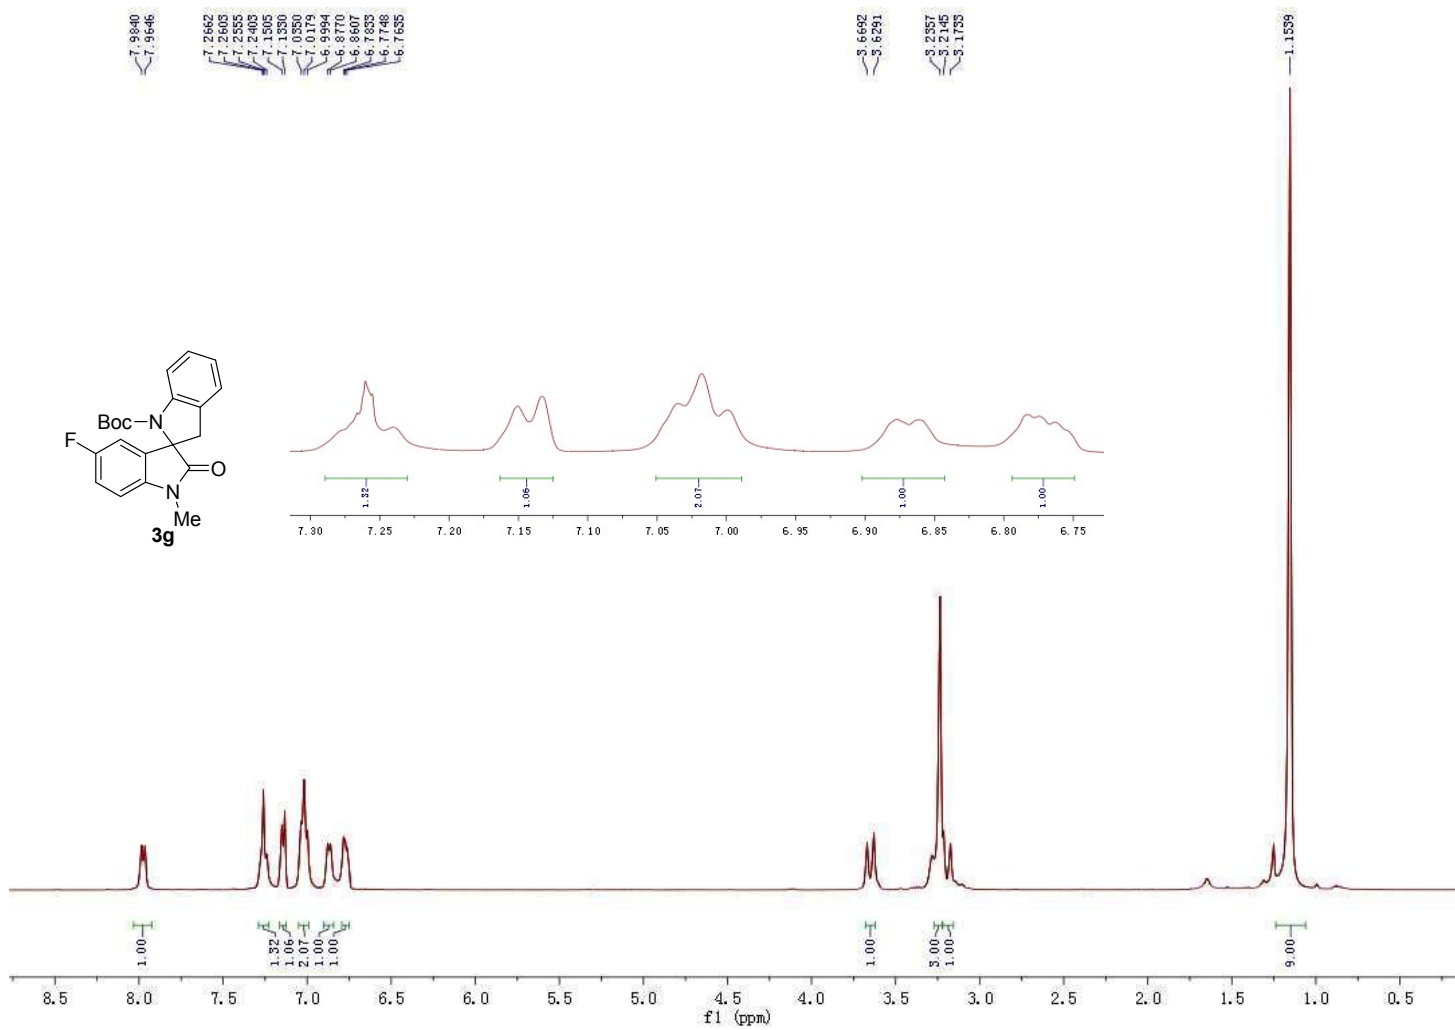



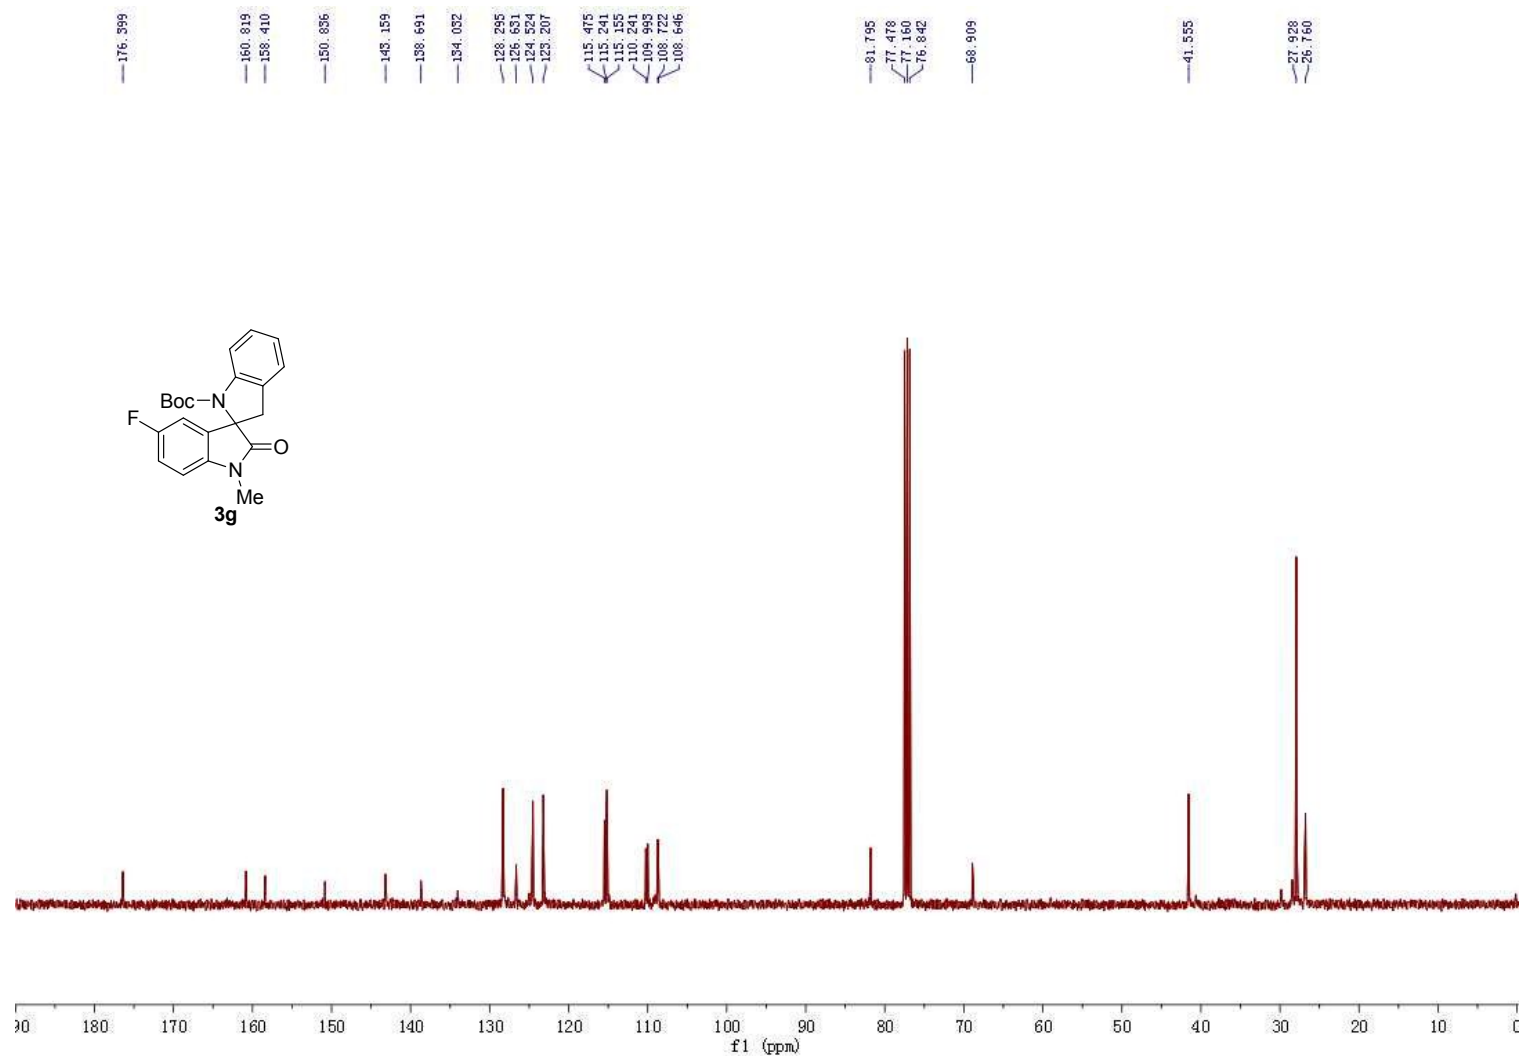

### <sup>1</sup>H and <sup>13</sup>C NMR of 3h

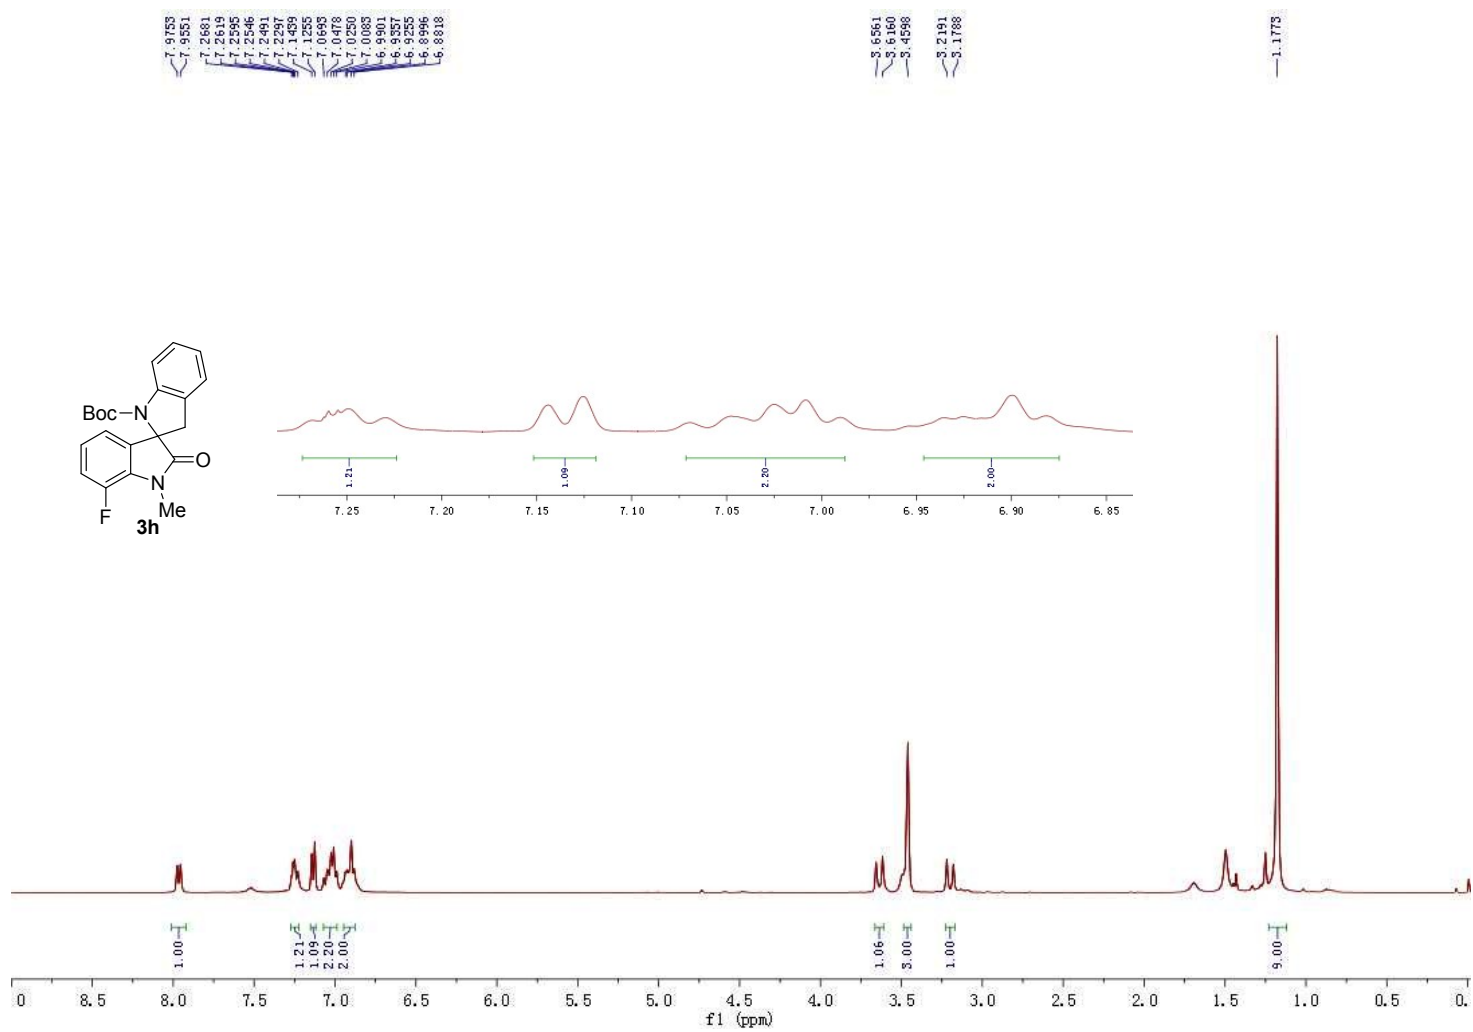

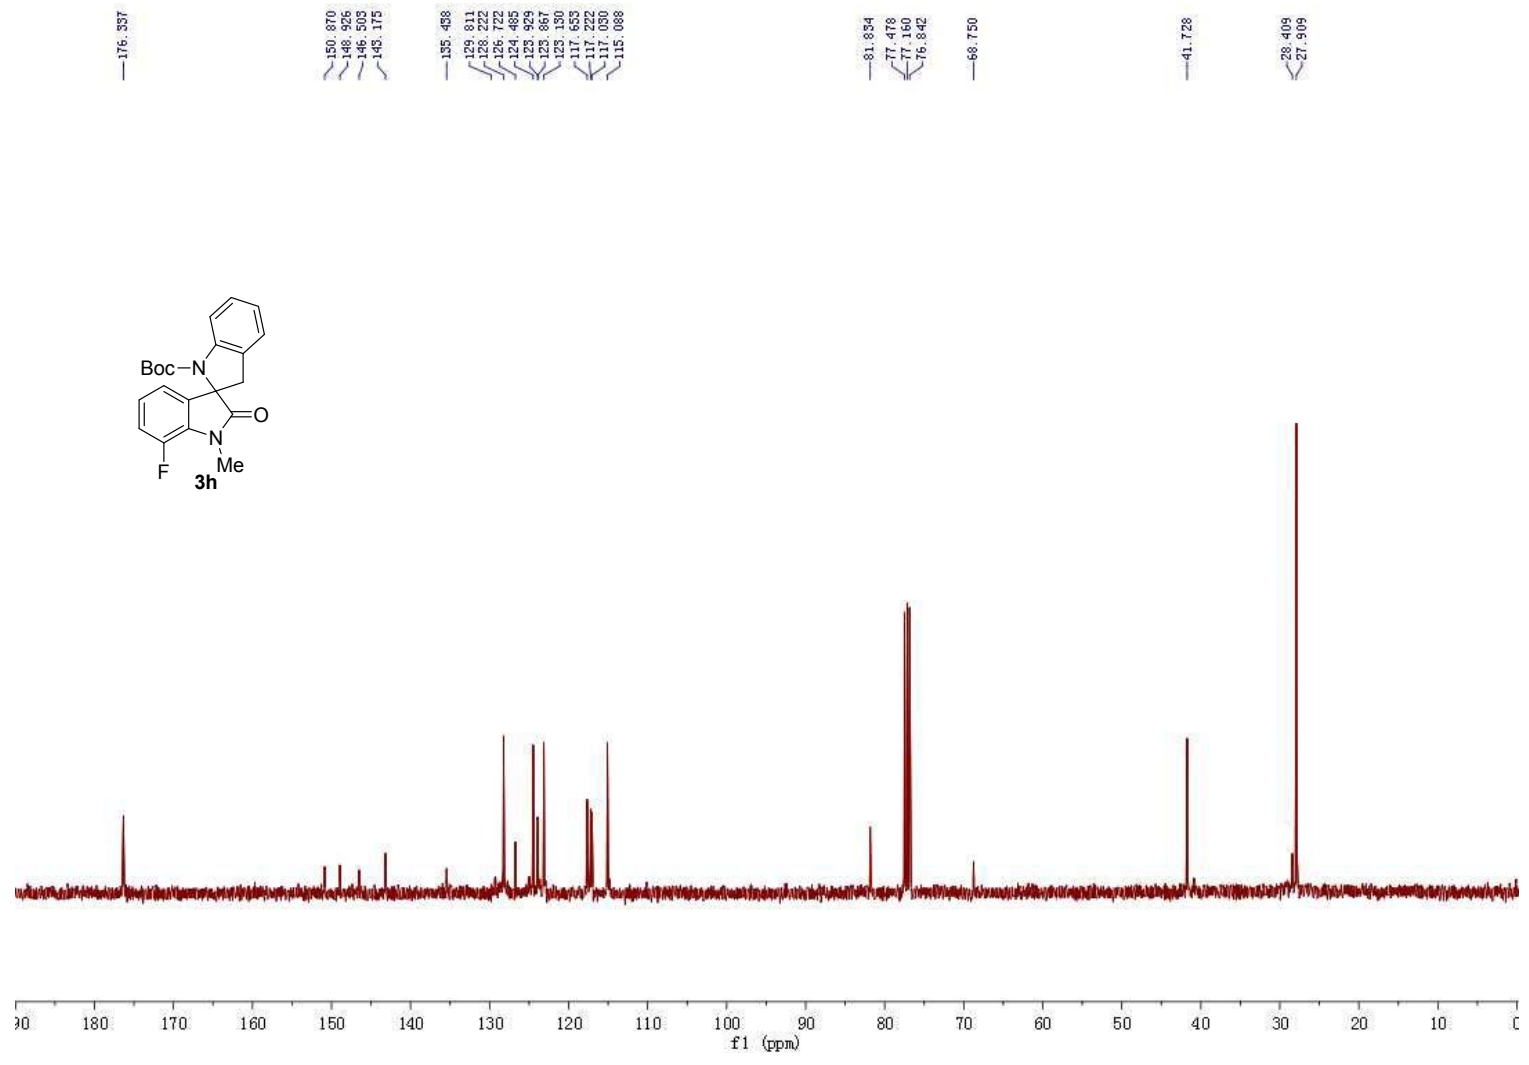

# <sup>1</sup>H and <sup>13</sup>C NMR of 3i

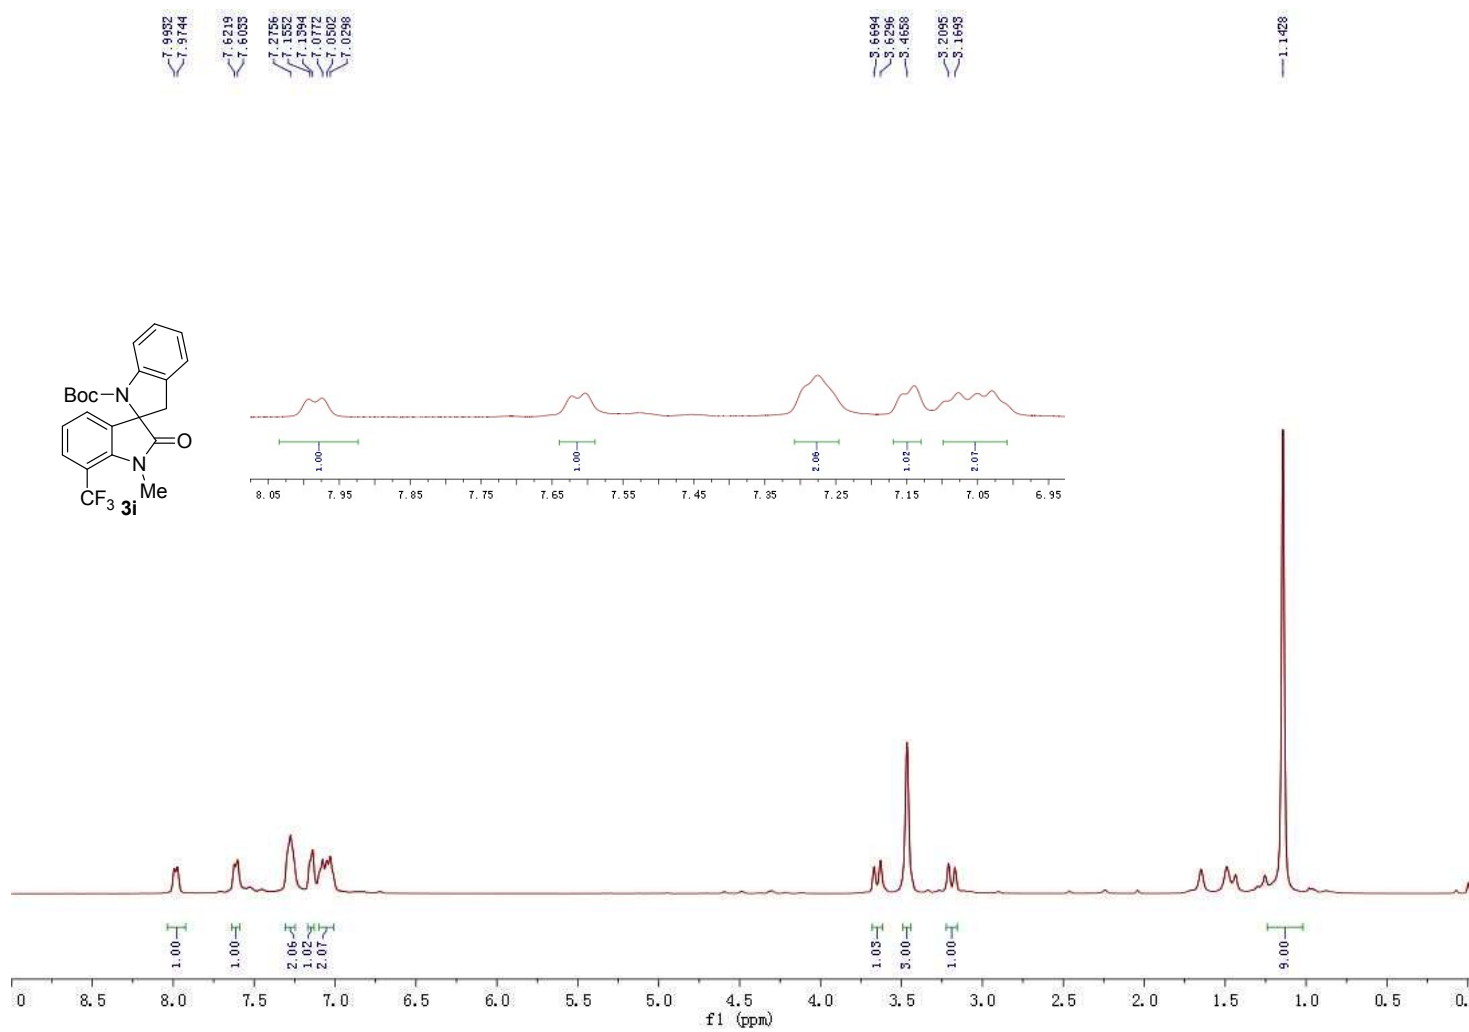

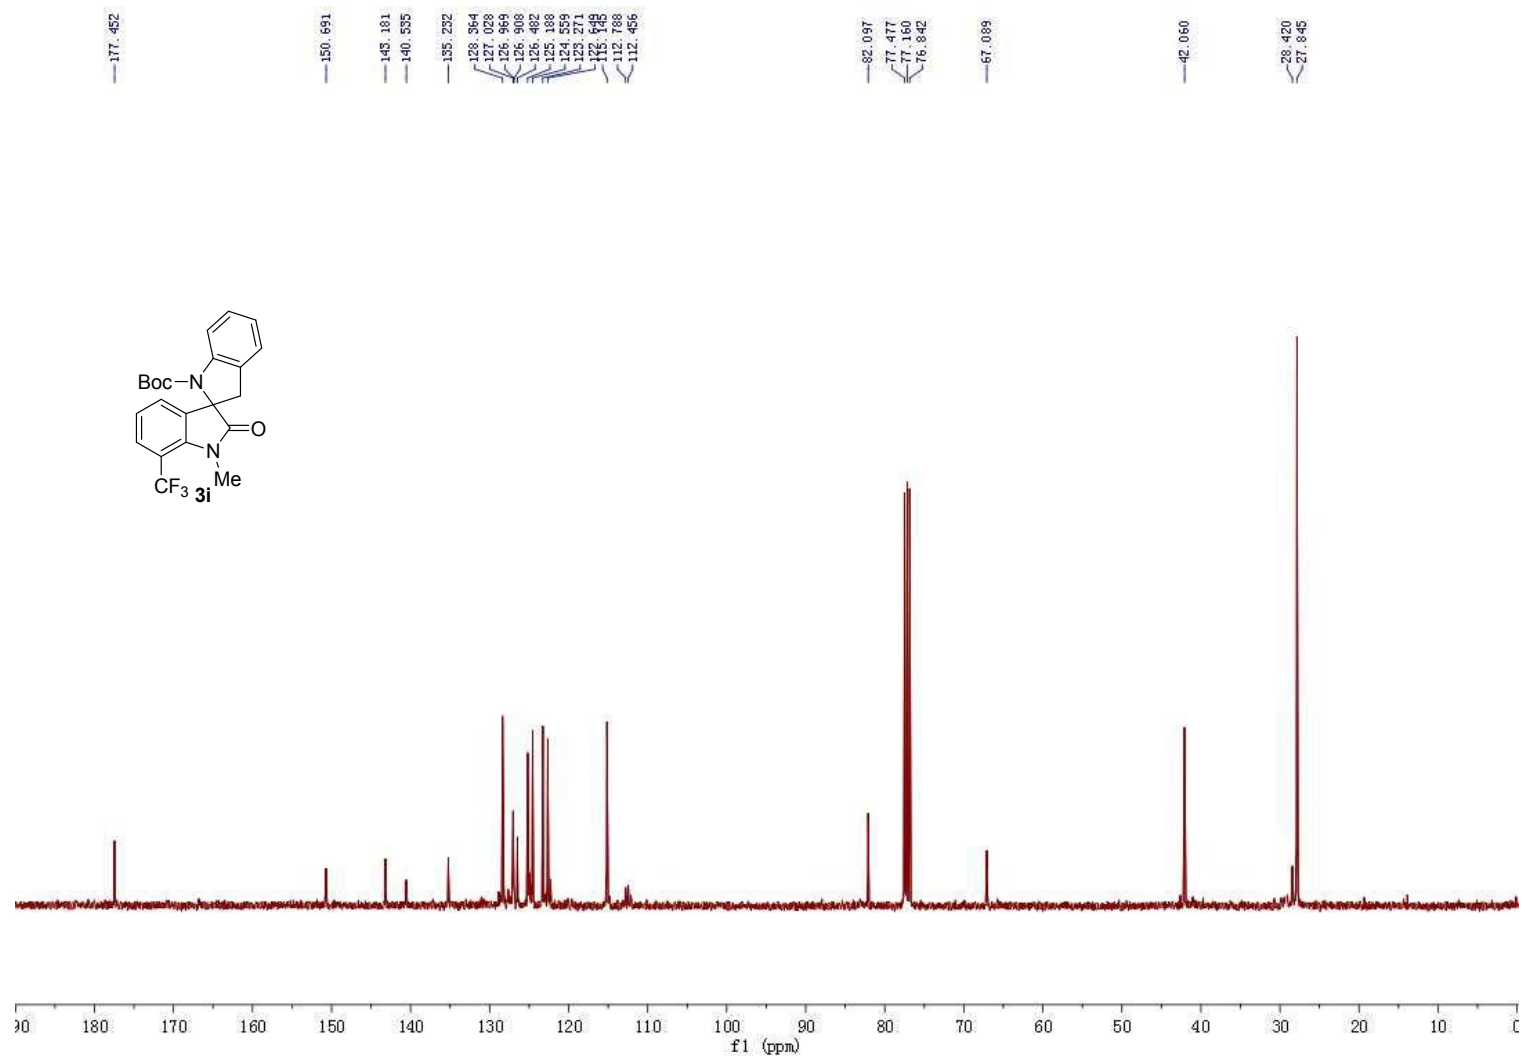



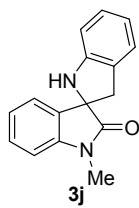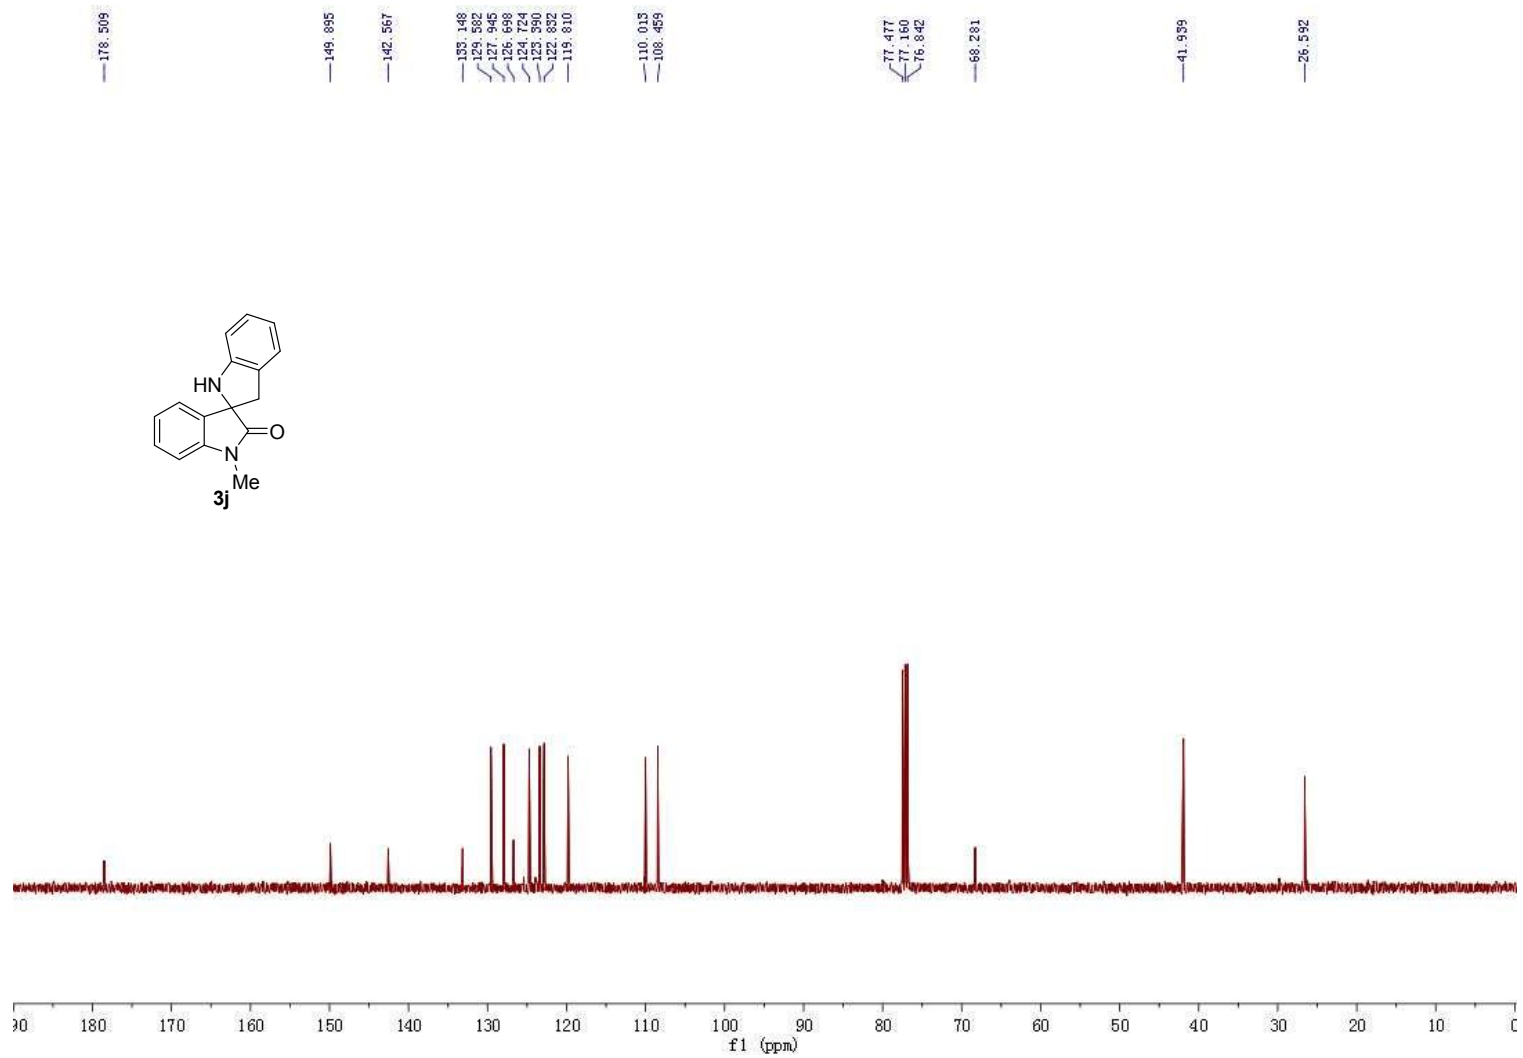

# <sup>1</sup>H and <sup>13</sup>C NMR of 3k

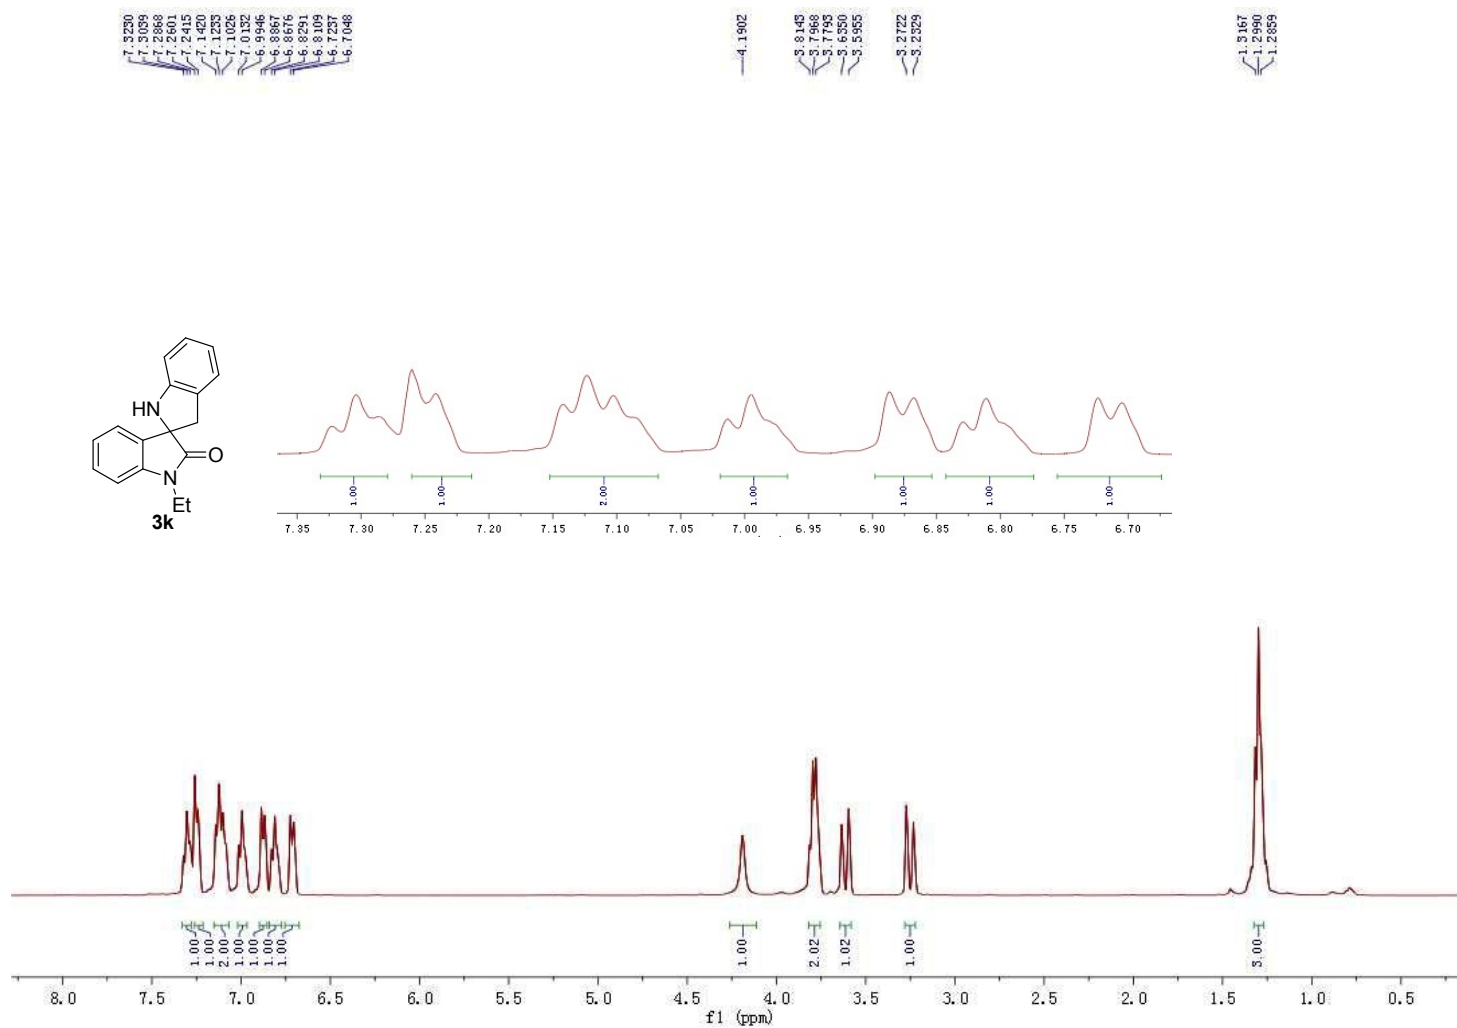



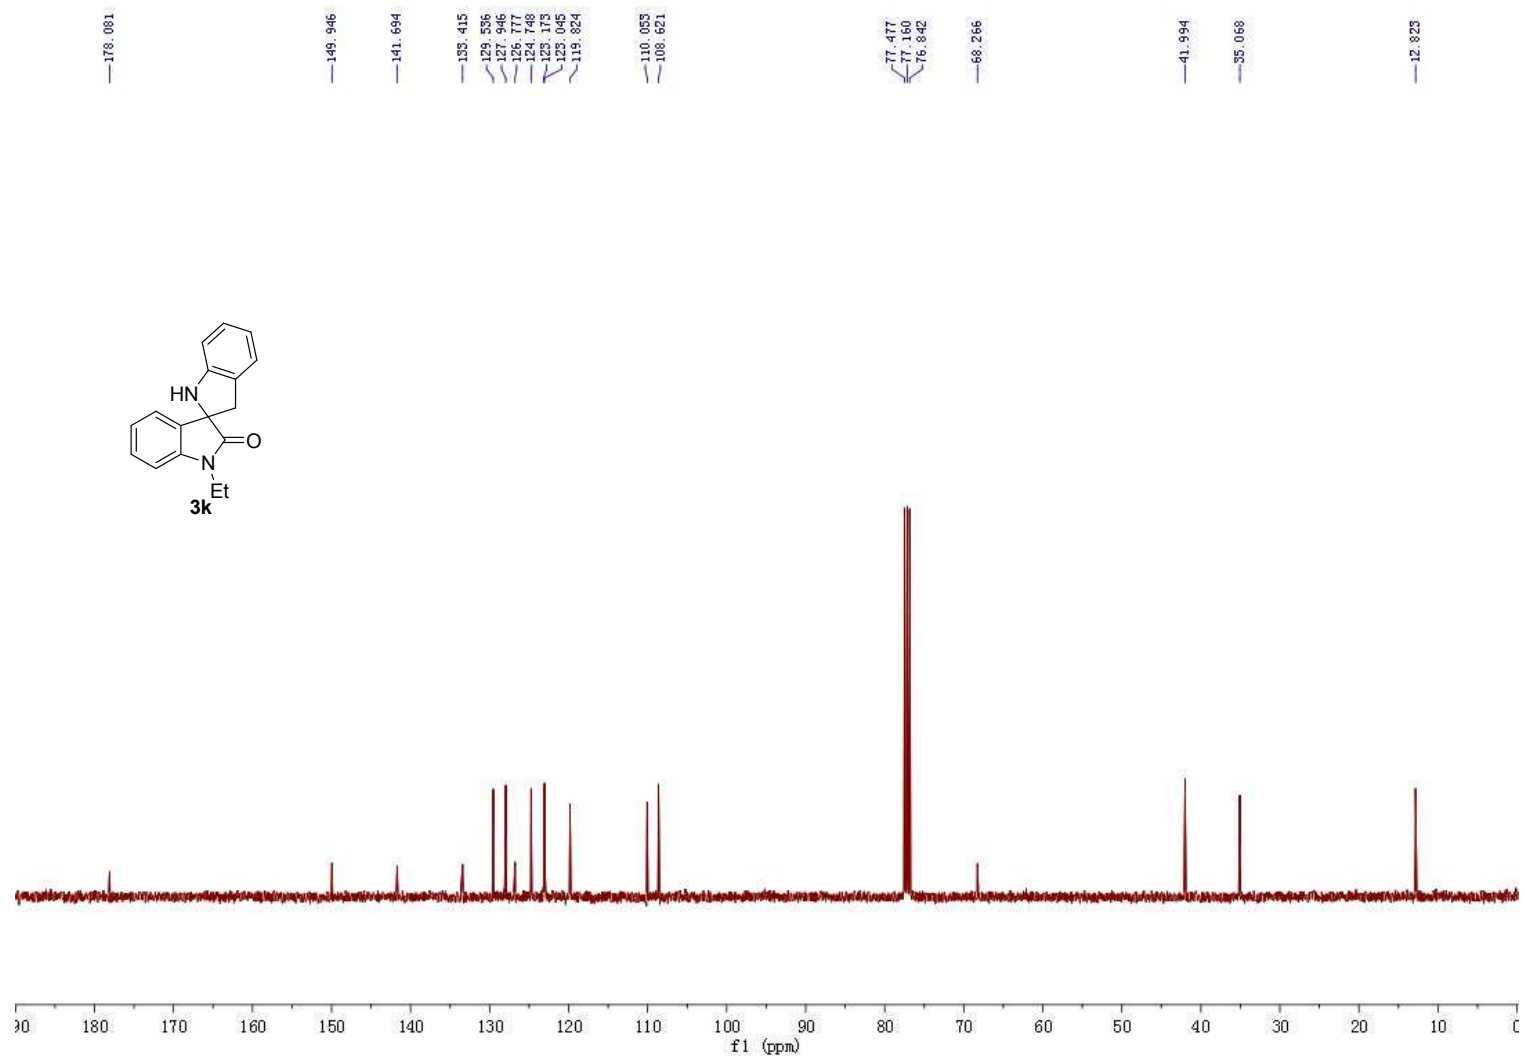

# <sup>1</sup>H and <sup>13</sup>C NMR of 3l

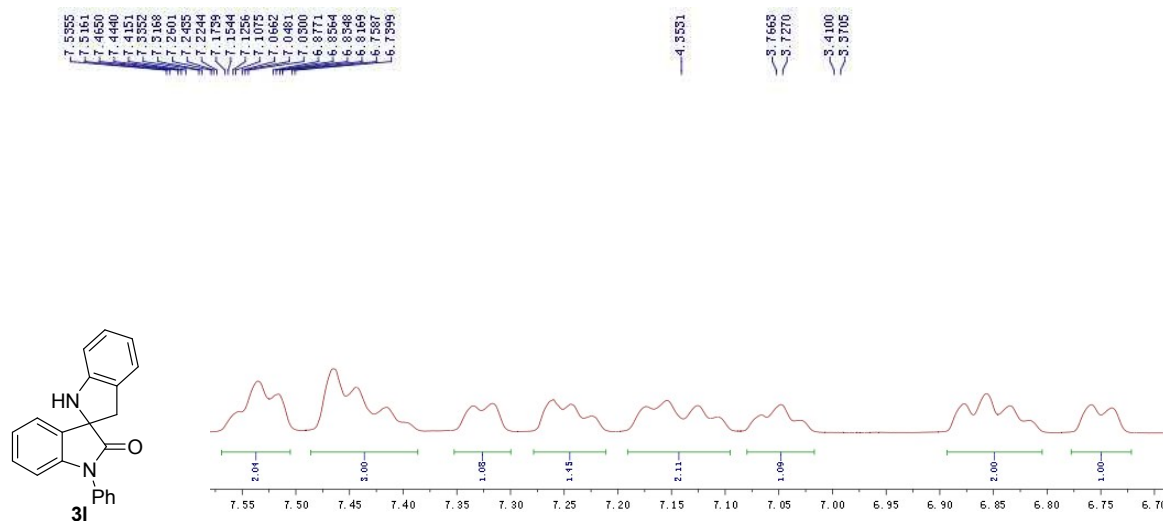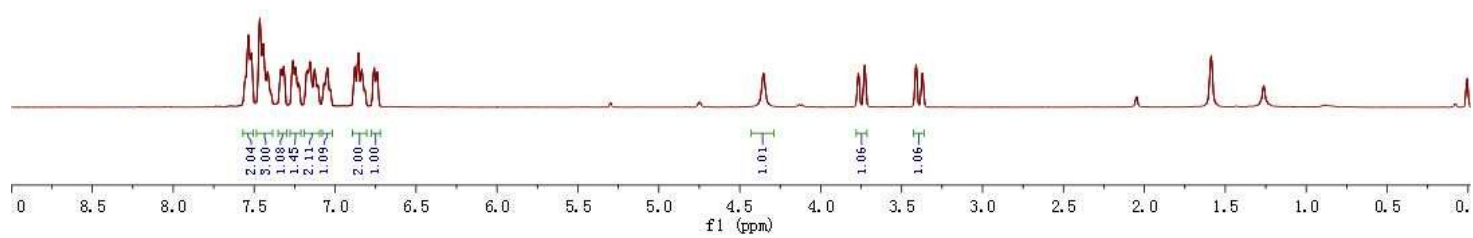

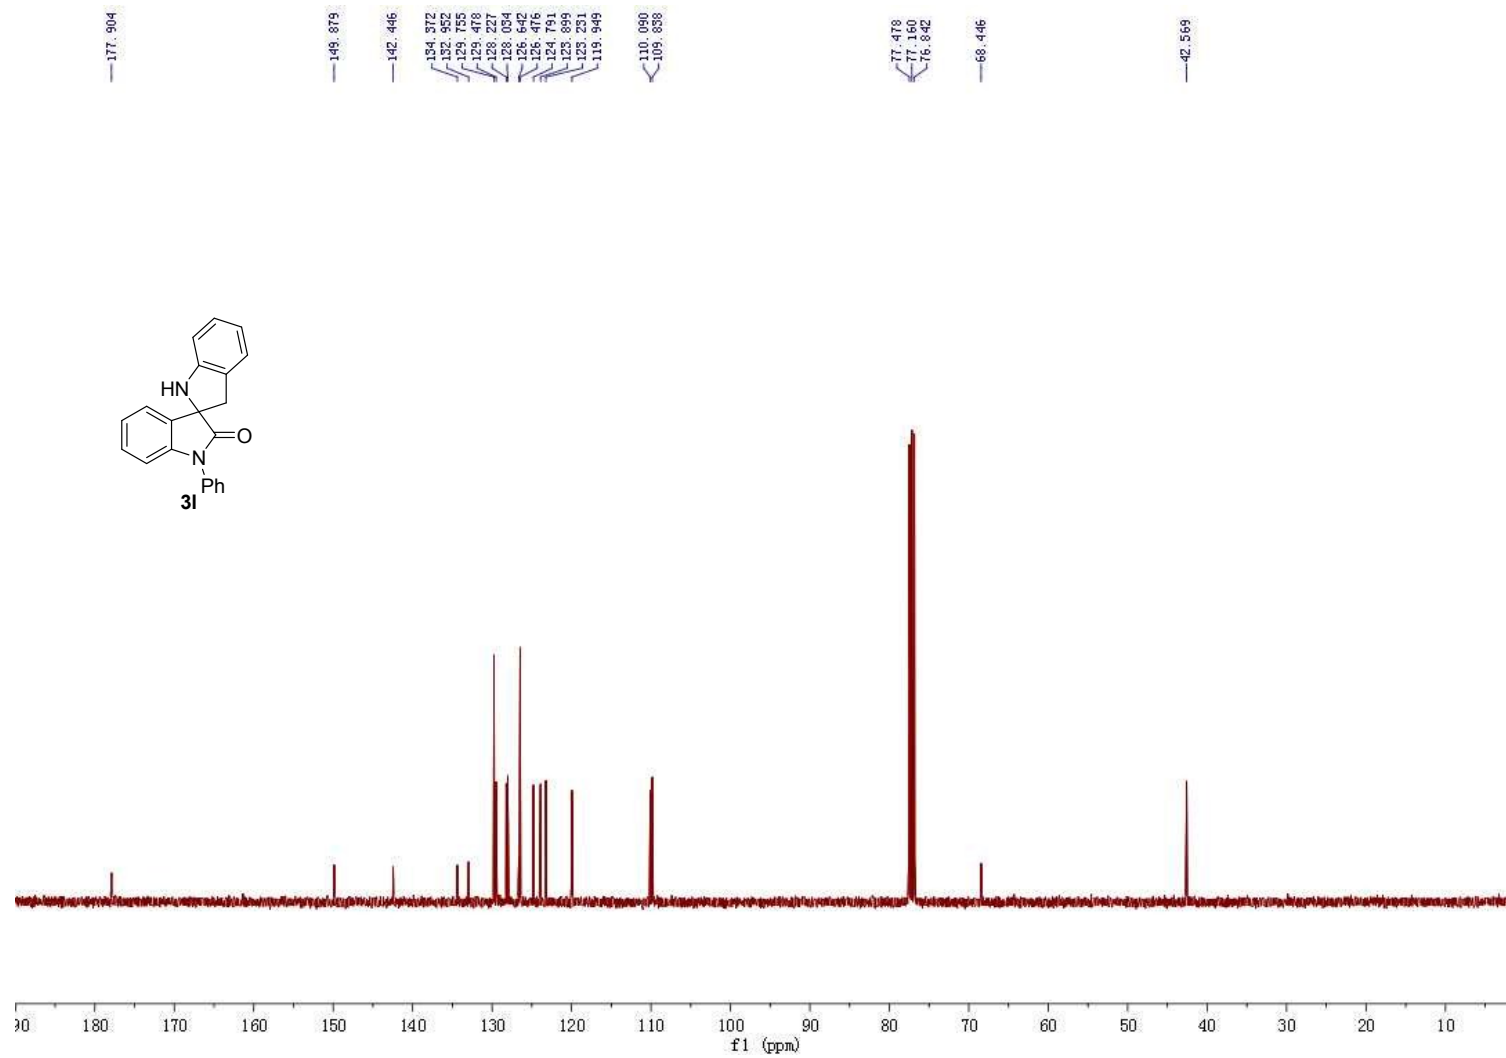

### $^1\text{H}$ and $^{13}\text{C}$ NMR of 3m

7.3283  
7.3254  
7.2956  
7.2902  
7.2137  
7.1959  
7.1641  
7.1481  
7.1183  
7.0992  
6.9906  
6.9721  
6.9352  
6.9252  
6.8271  
6.8089  
6.7646  
6.7451  
6.7260

4.9880  
4.9441  
4.9060  
4.8672

4.2584

3.7109  
3.6715

3.3412  
3.3019

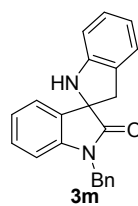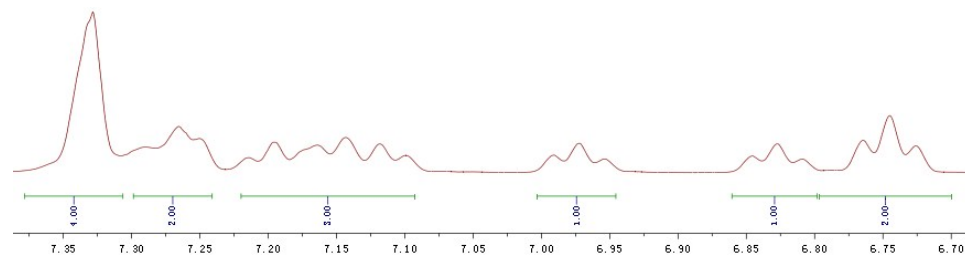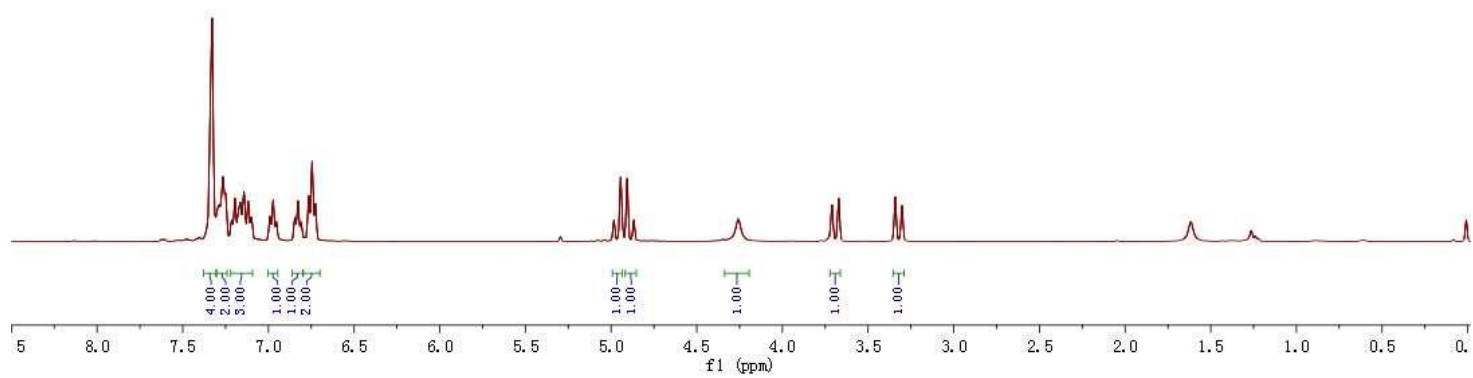

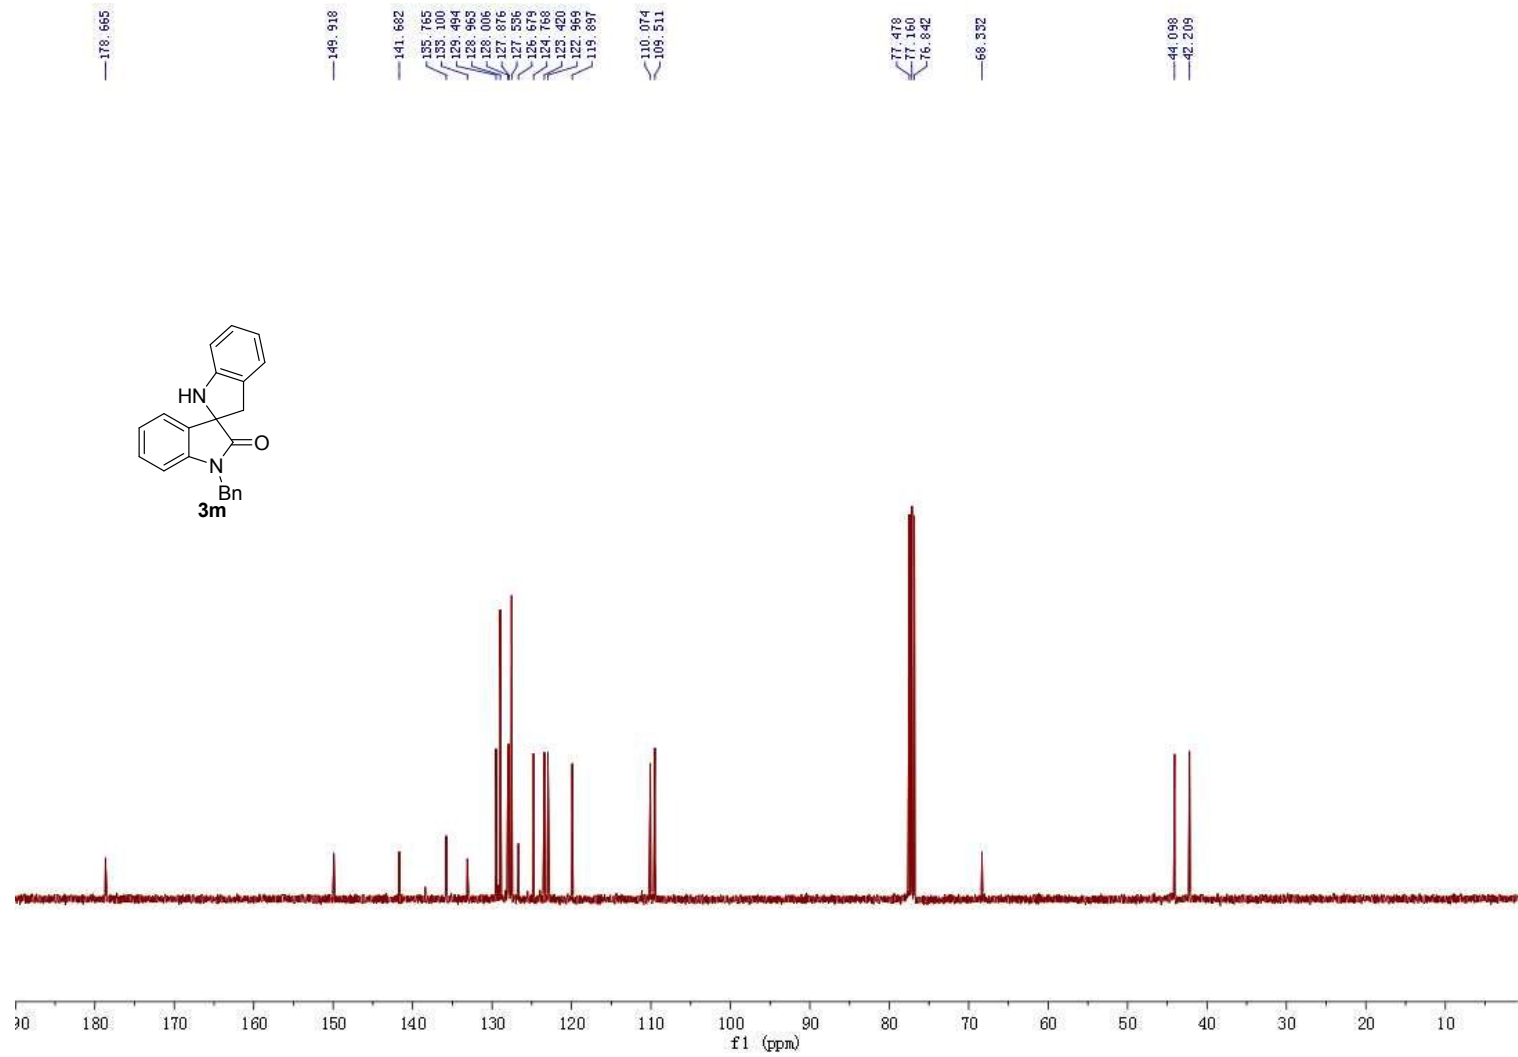

# <sup>1</sup>H and <sup>13</sup>C NMR of 3n

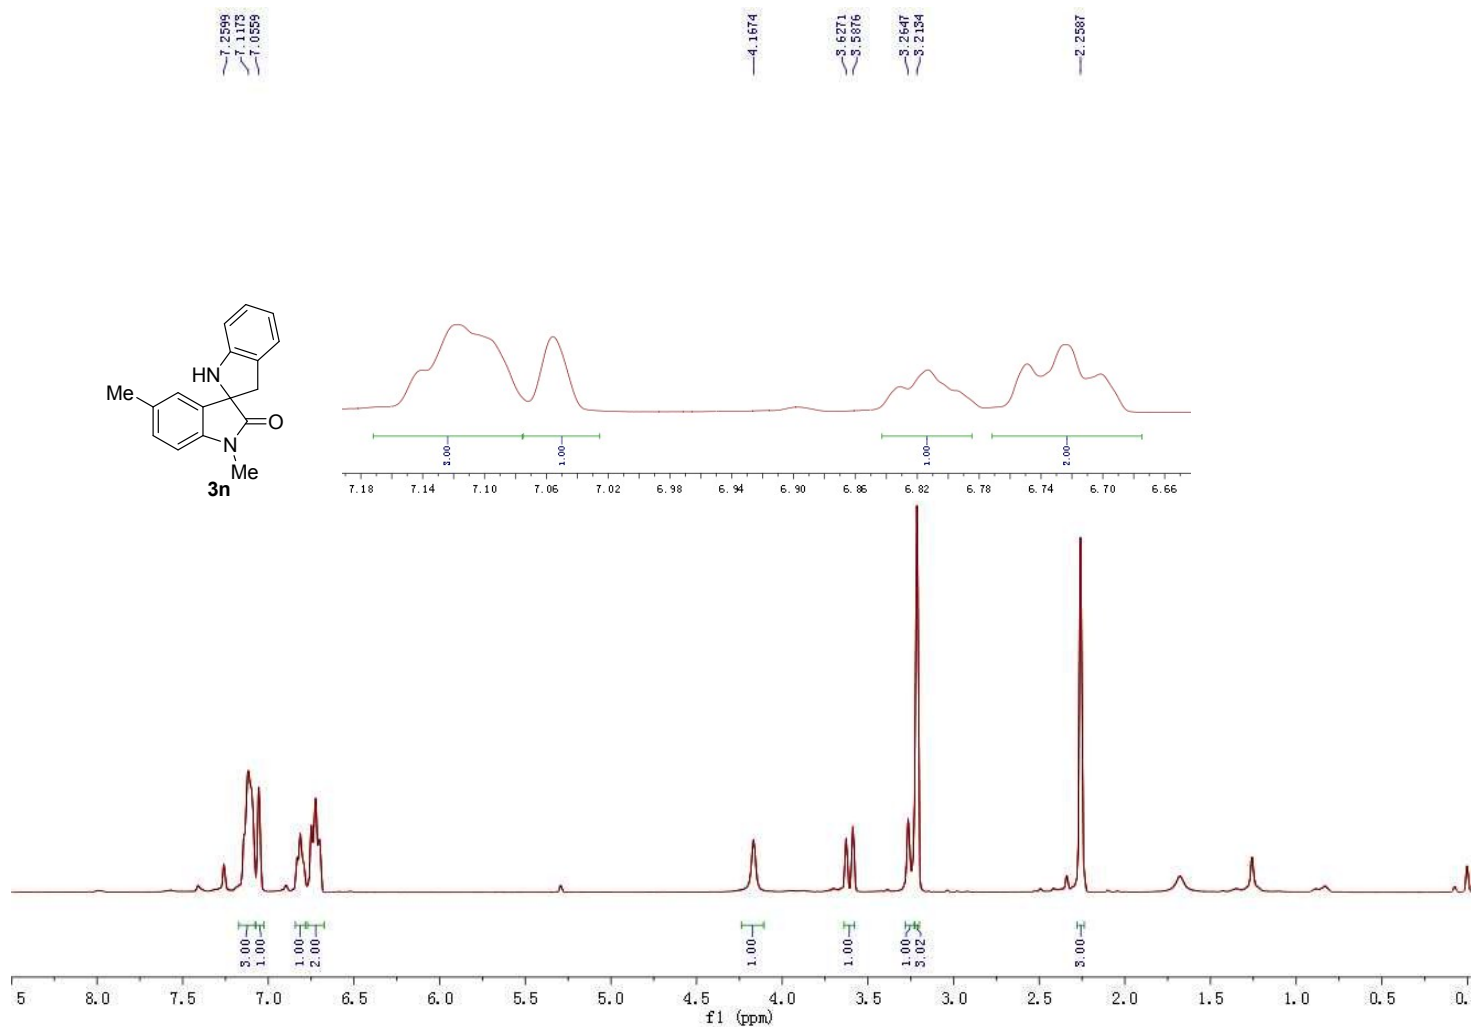

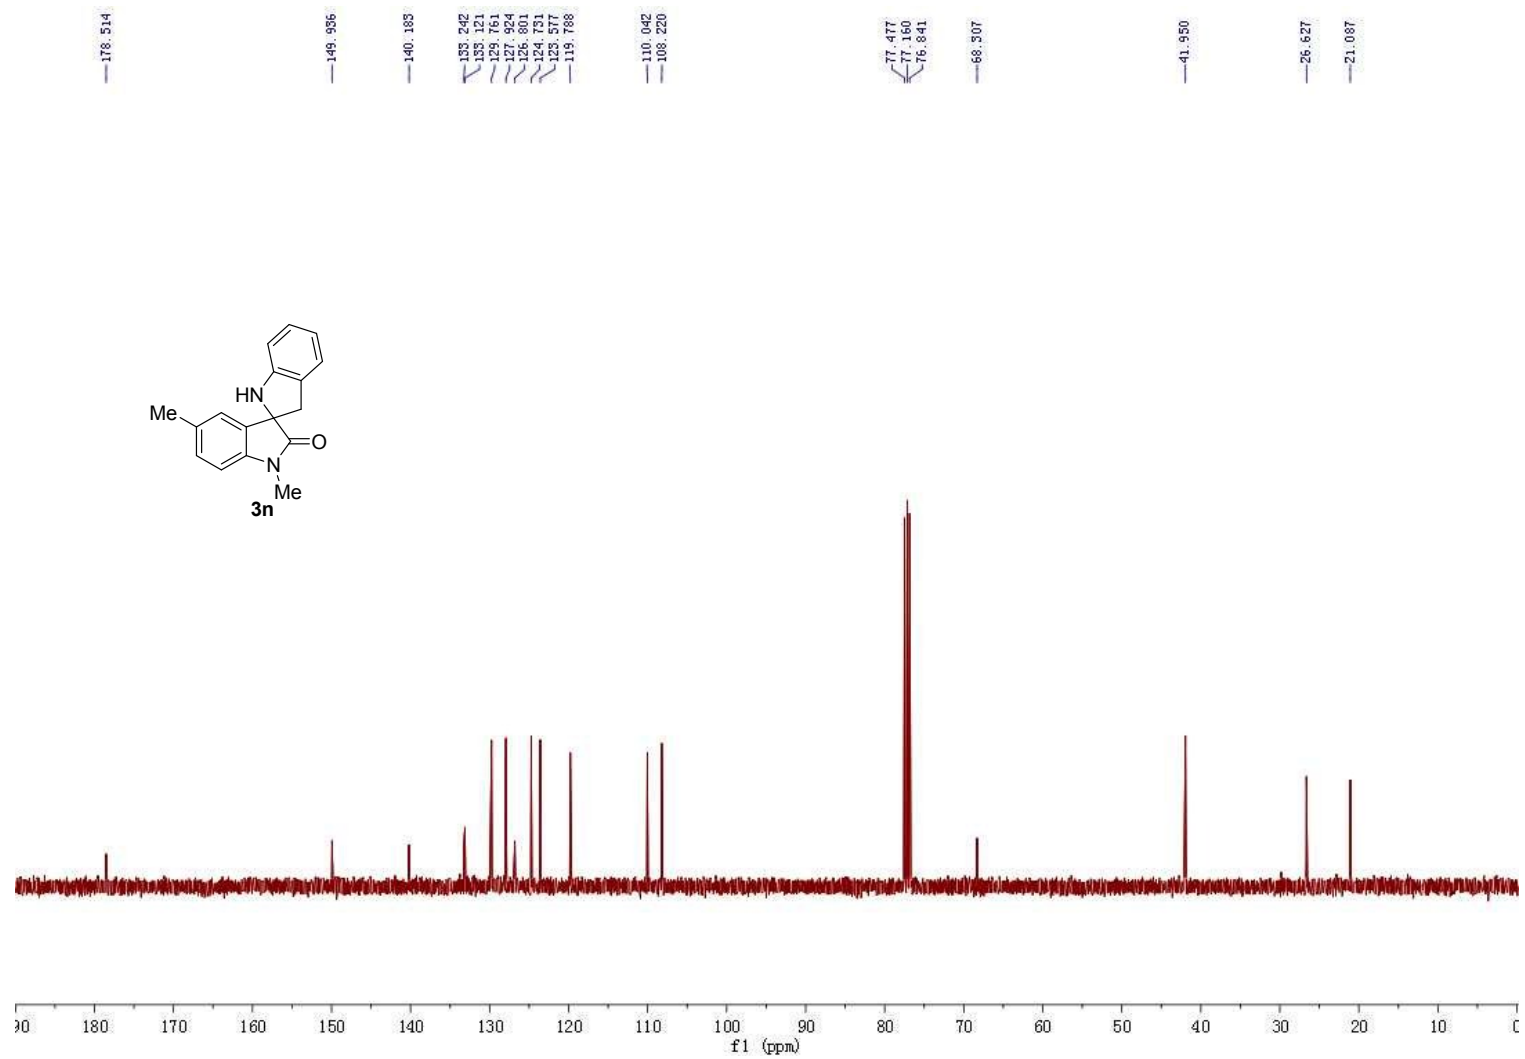

# <sup>1</sup>H and <sup>13</sup>C NMR of 3o

7.2601  
7.1186  
7.0837  
7.0222  
6.9950  
6.9760  
6.9322  
6.8138  
6.7885  
6.7772  
6.7669  
6.7570  
6.7162  
6.6971

4.2140

3.6275

3.5881

3.2499

3.2155

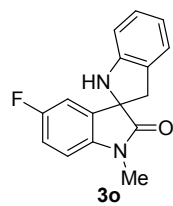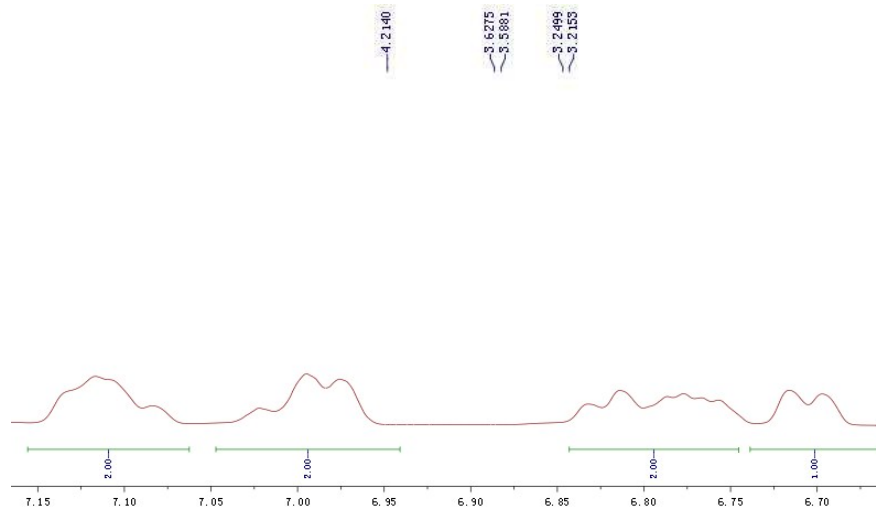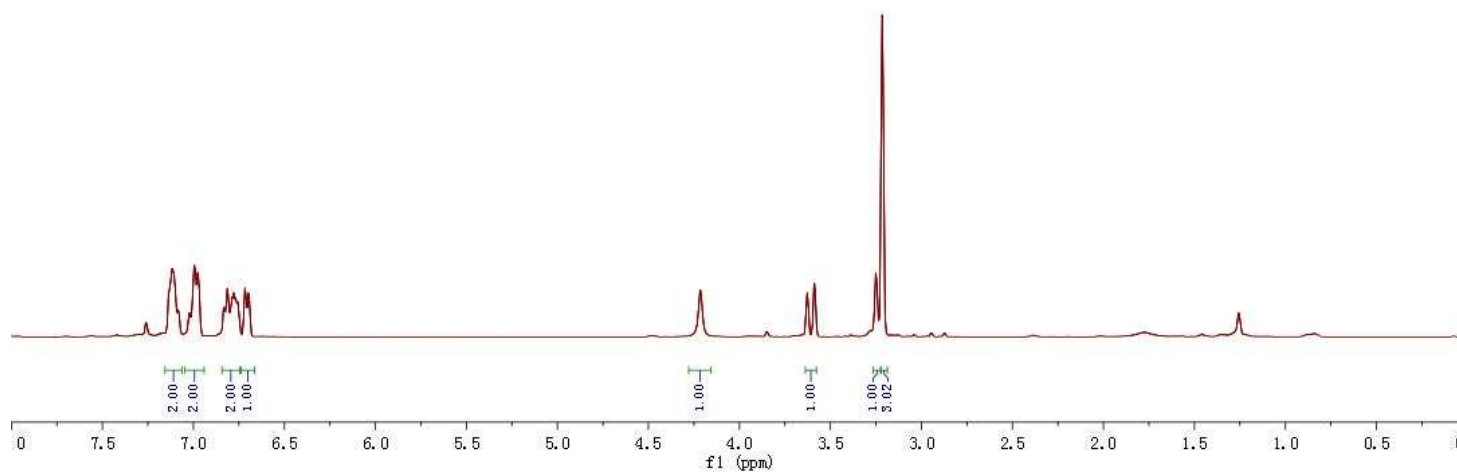



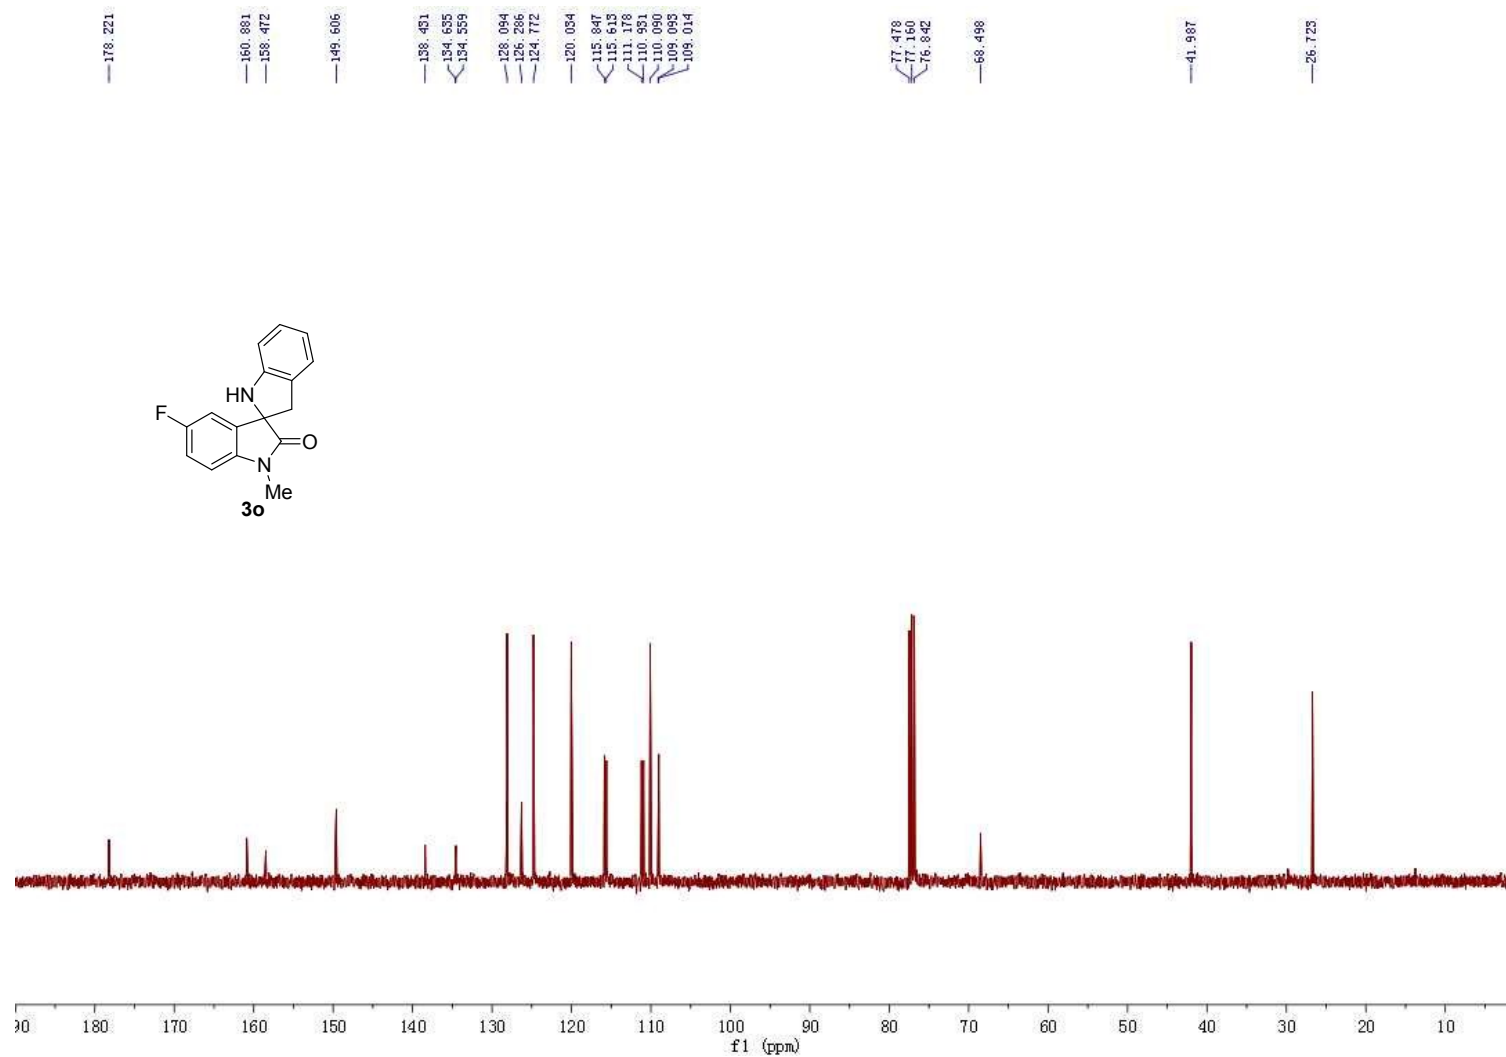

# <sup>1</sup>H and <sup>13</sup>C NMR of 3p

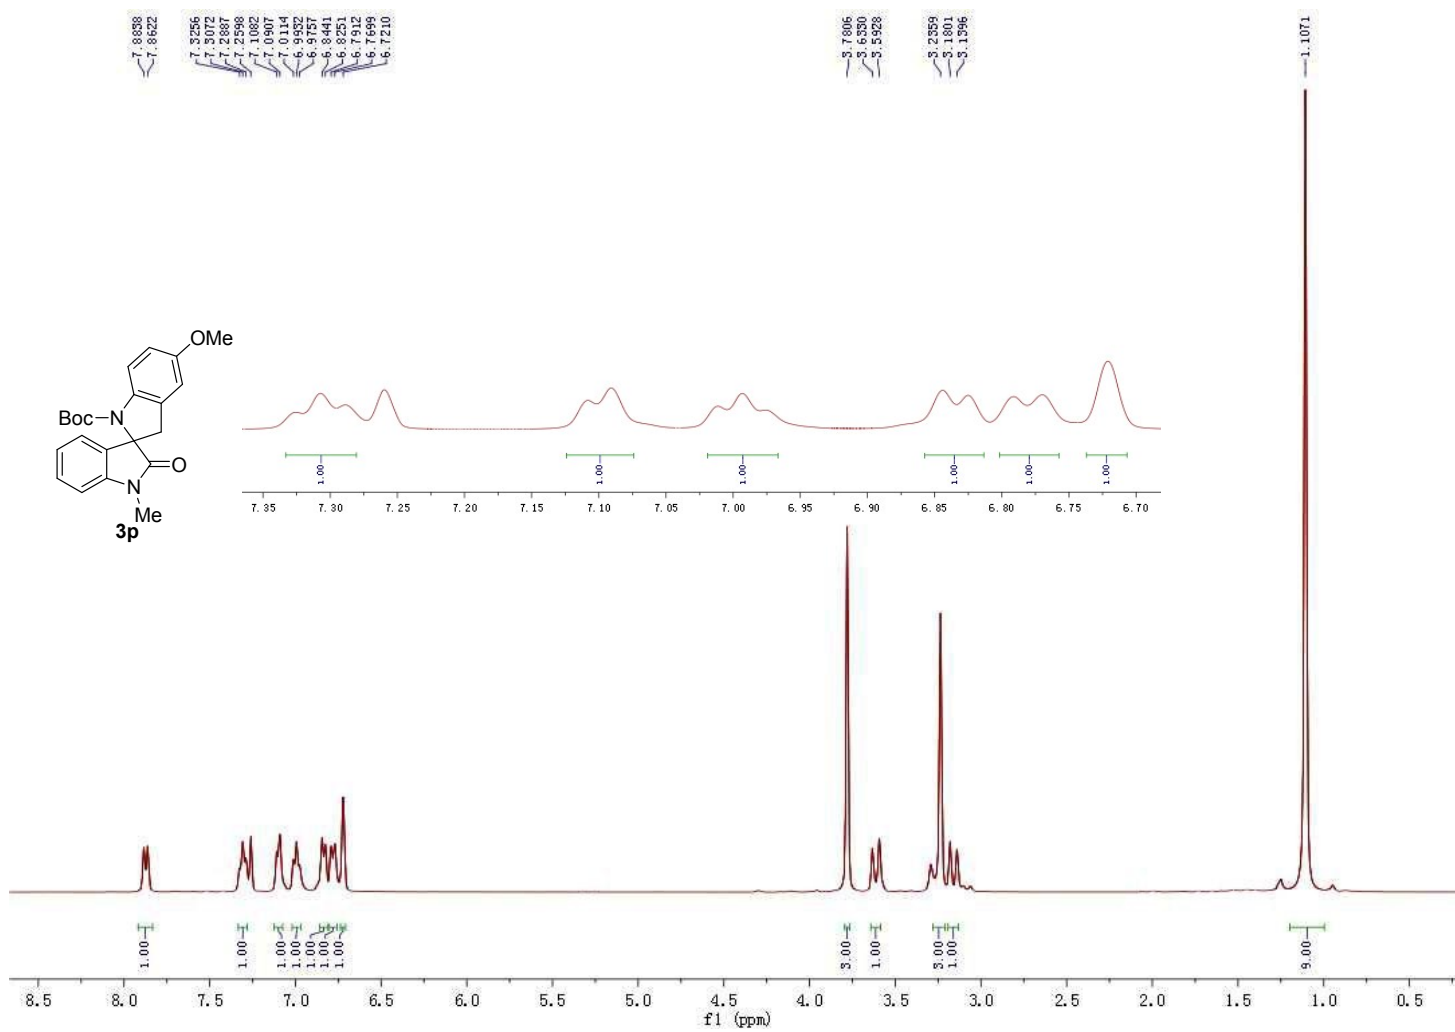

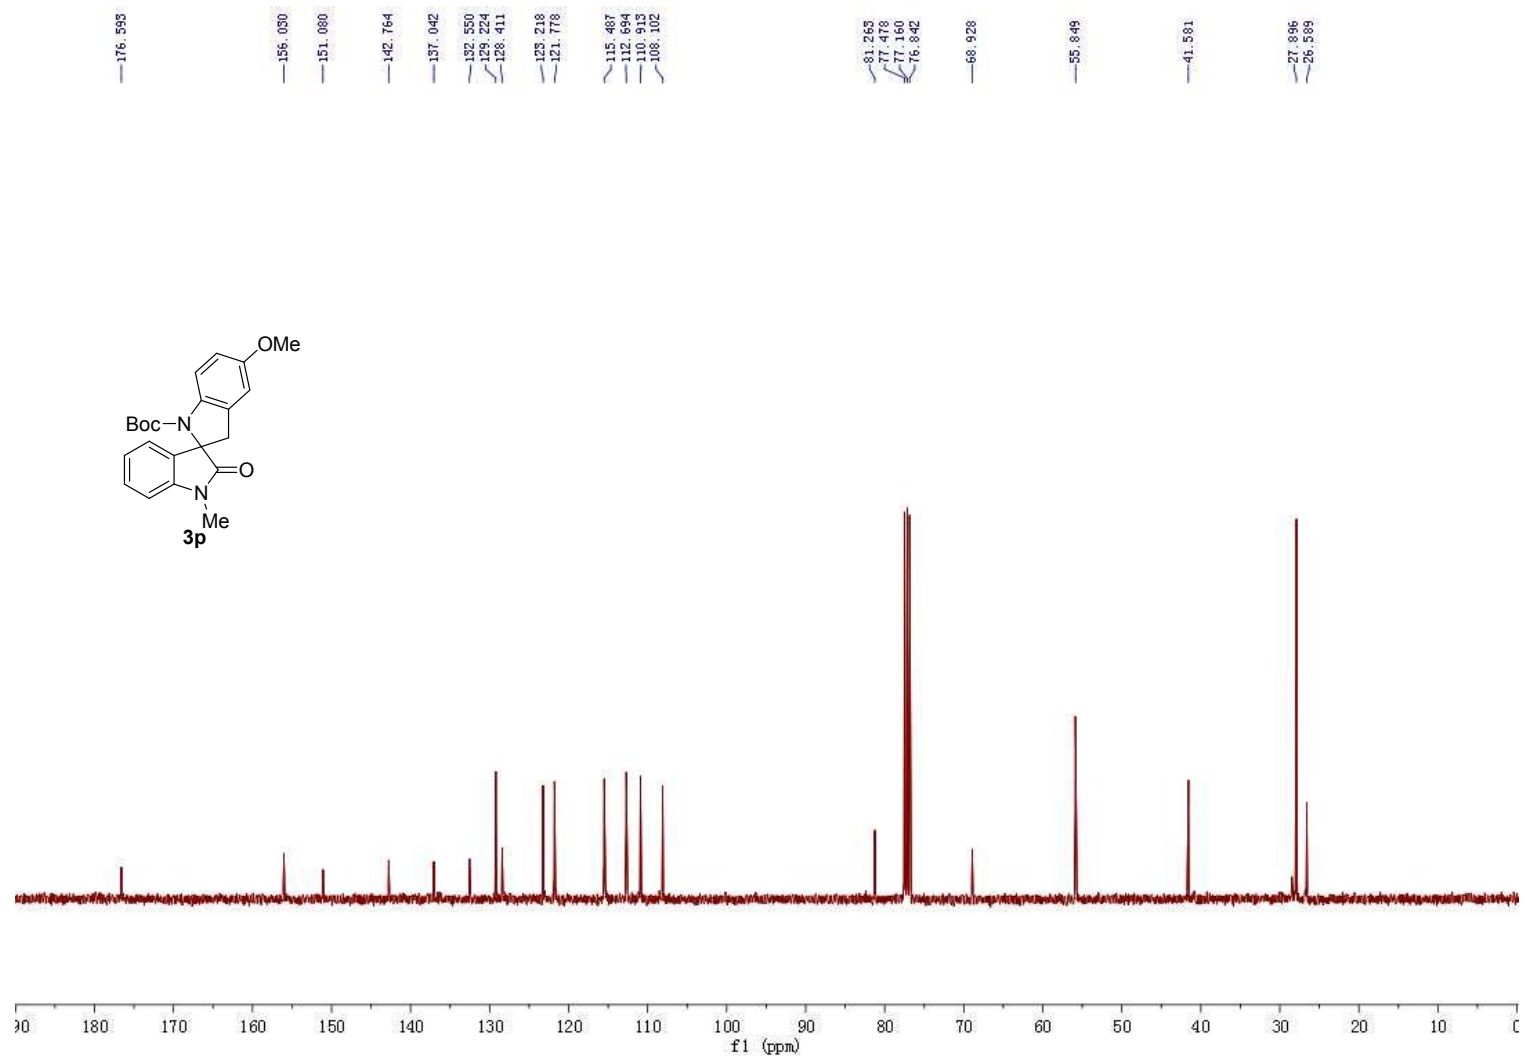

# <sup>1</sup>H and <sup>13</sup>C NMR of 3q

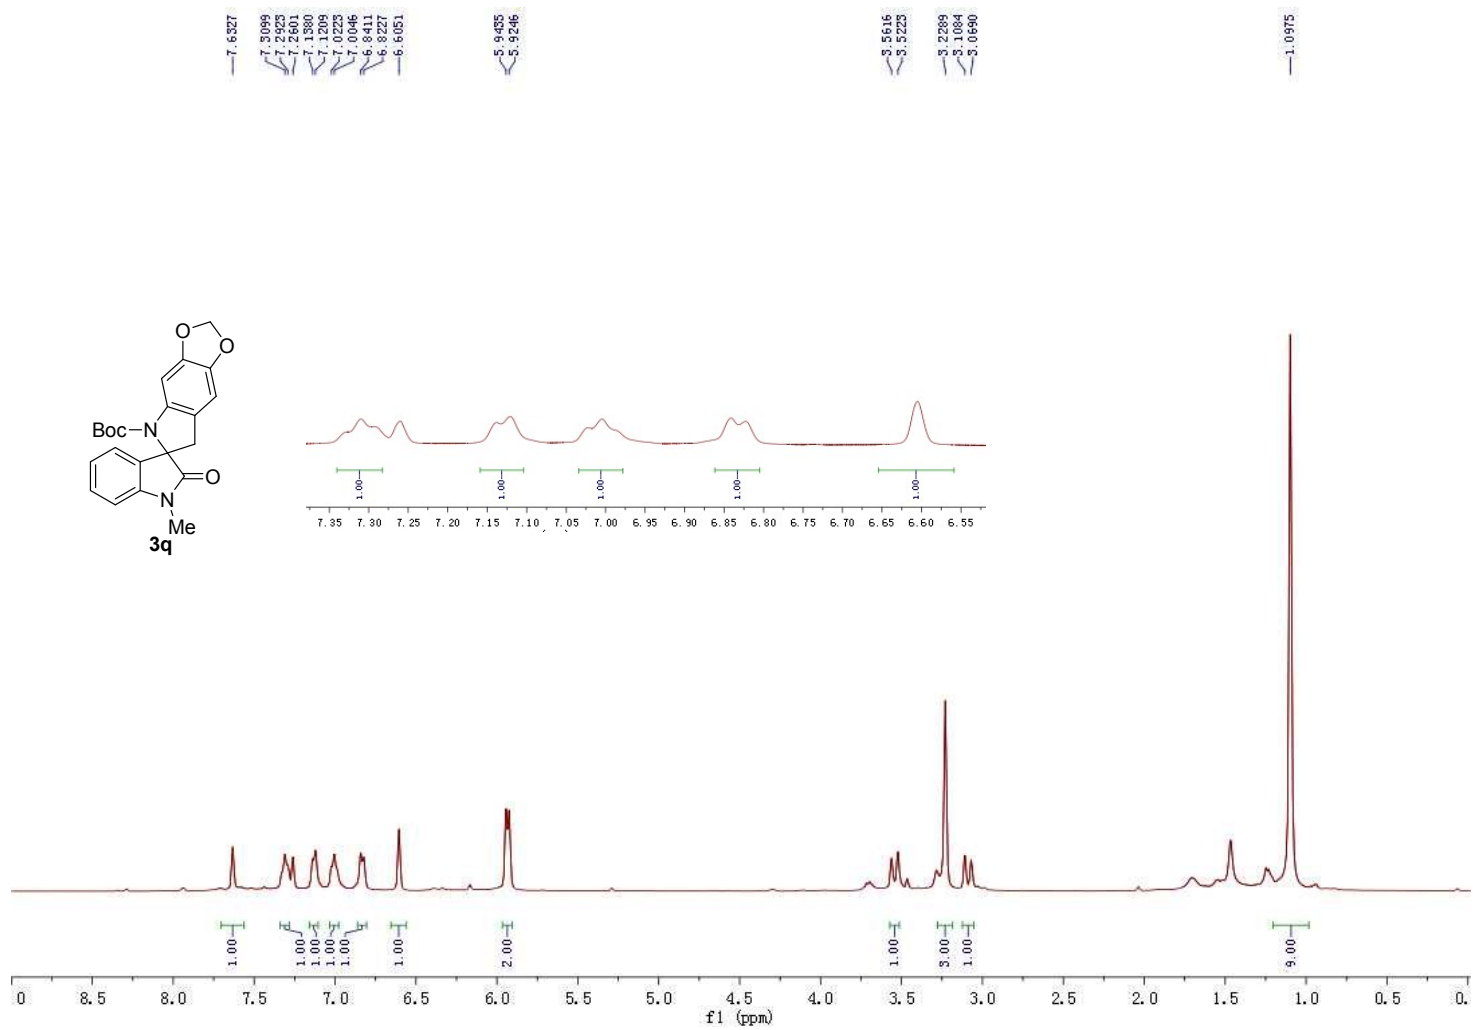

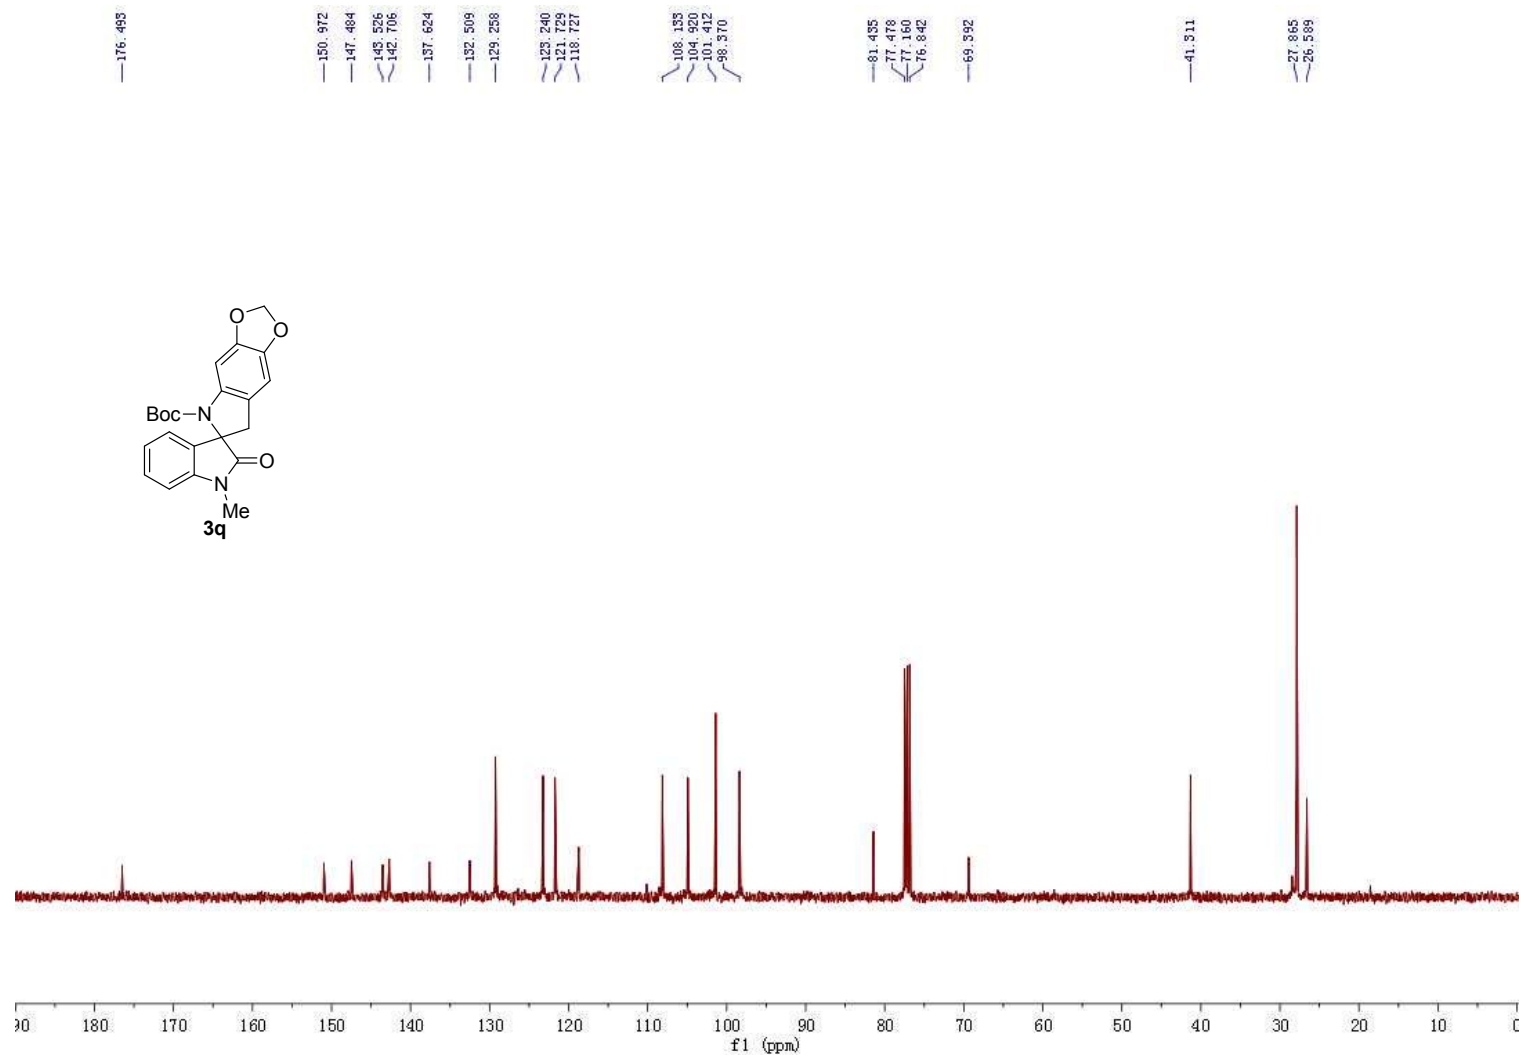

# <sup>1</sup>H and <sup>13</sup>C NMR of 3r

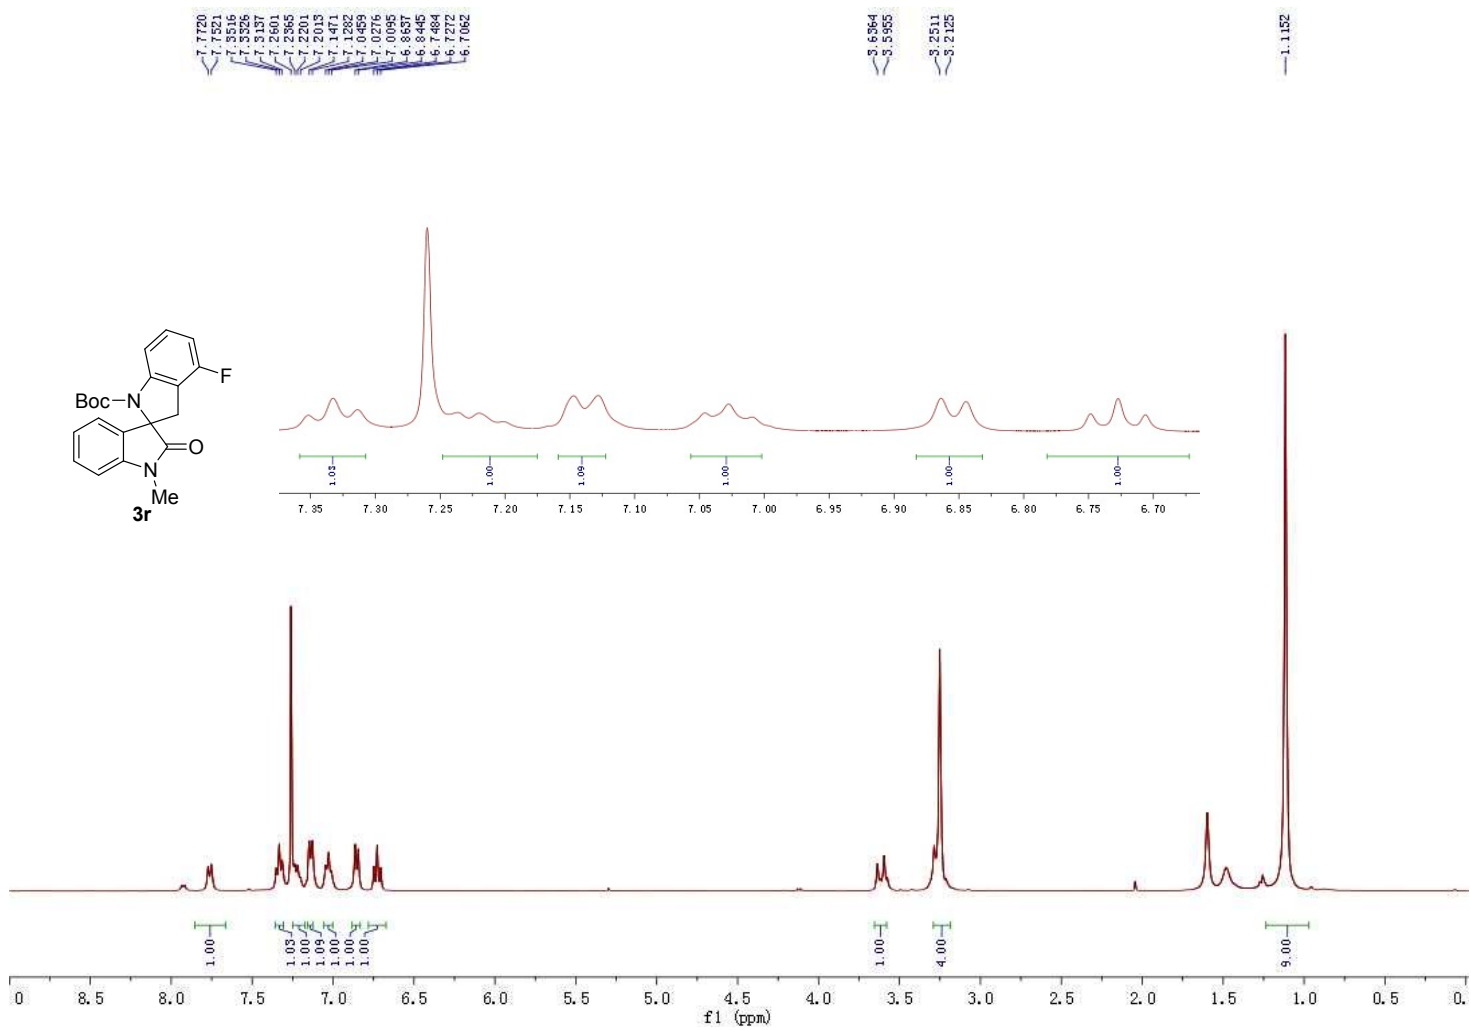

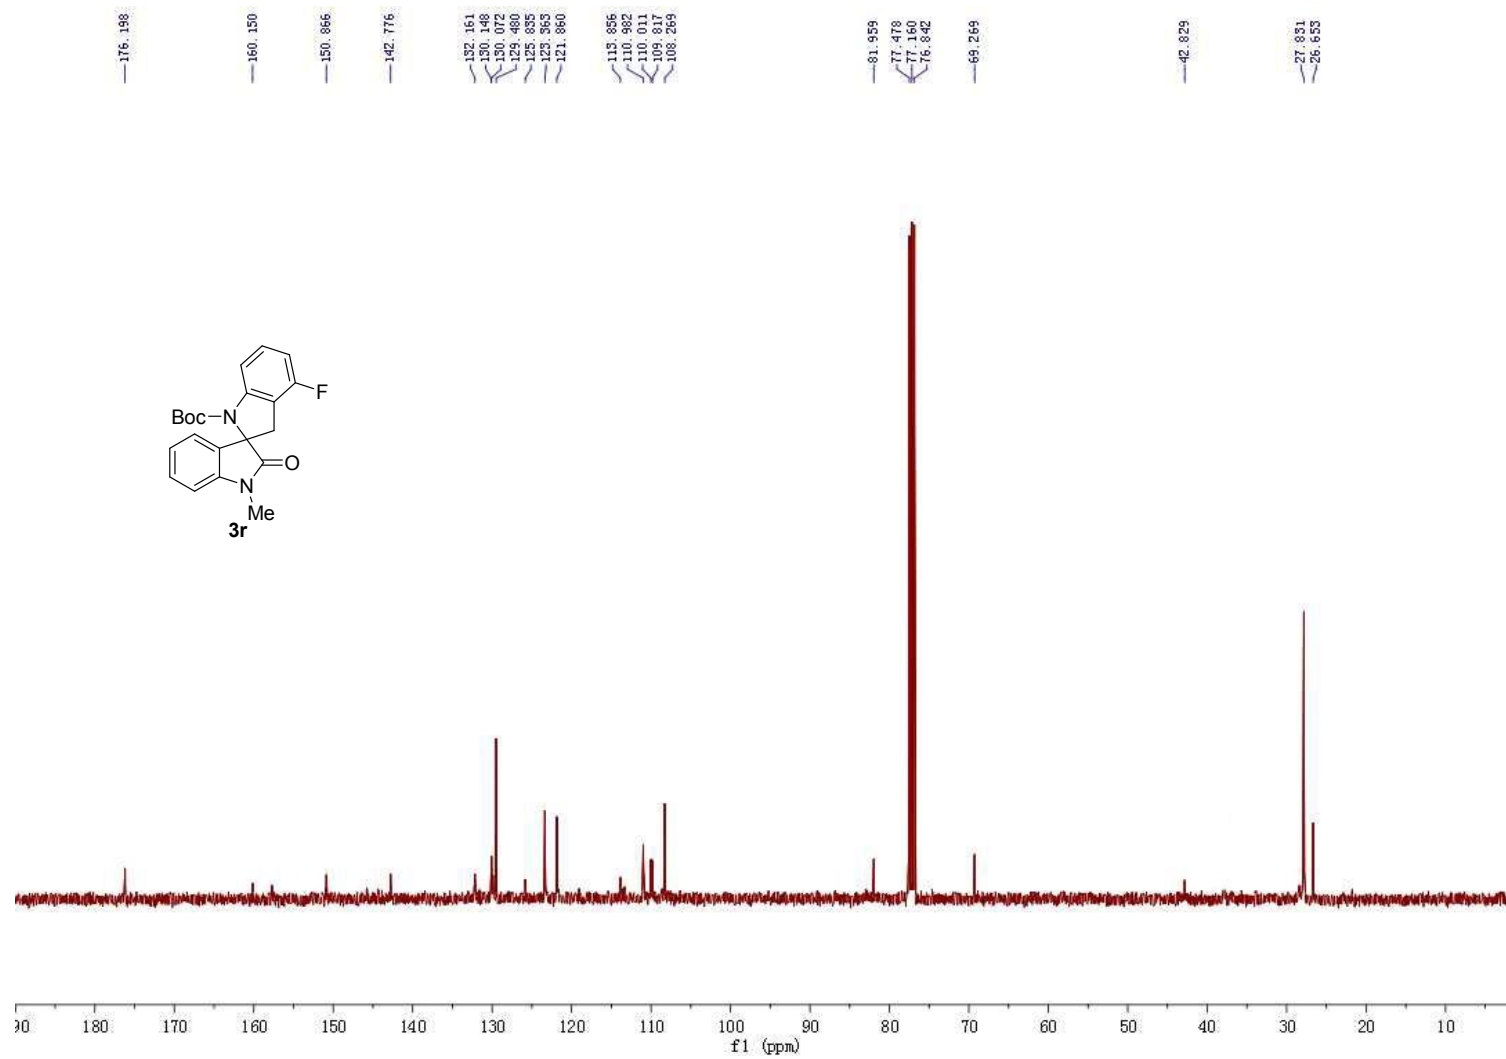

# <sup>1</sup>H and <sup>13</sup>C NMR of 3s

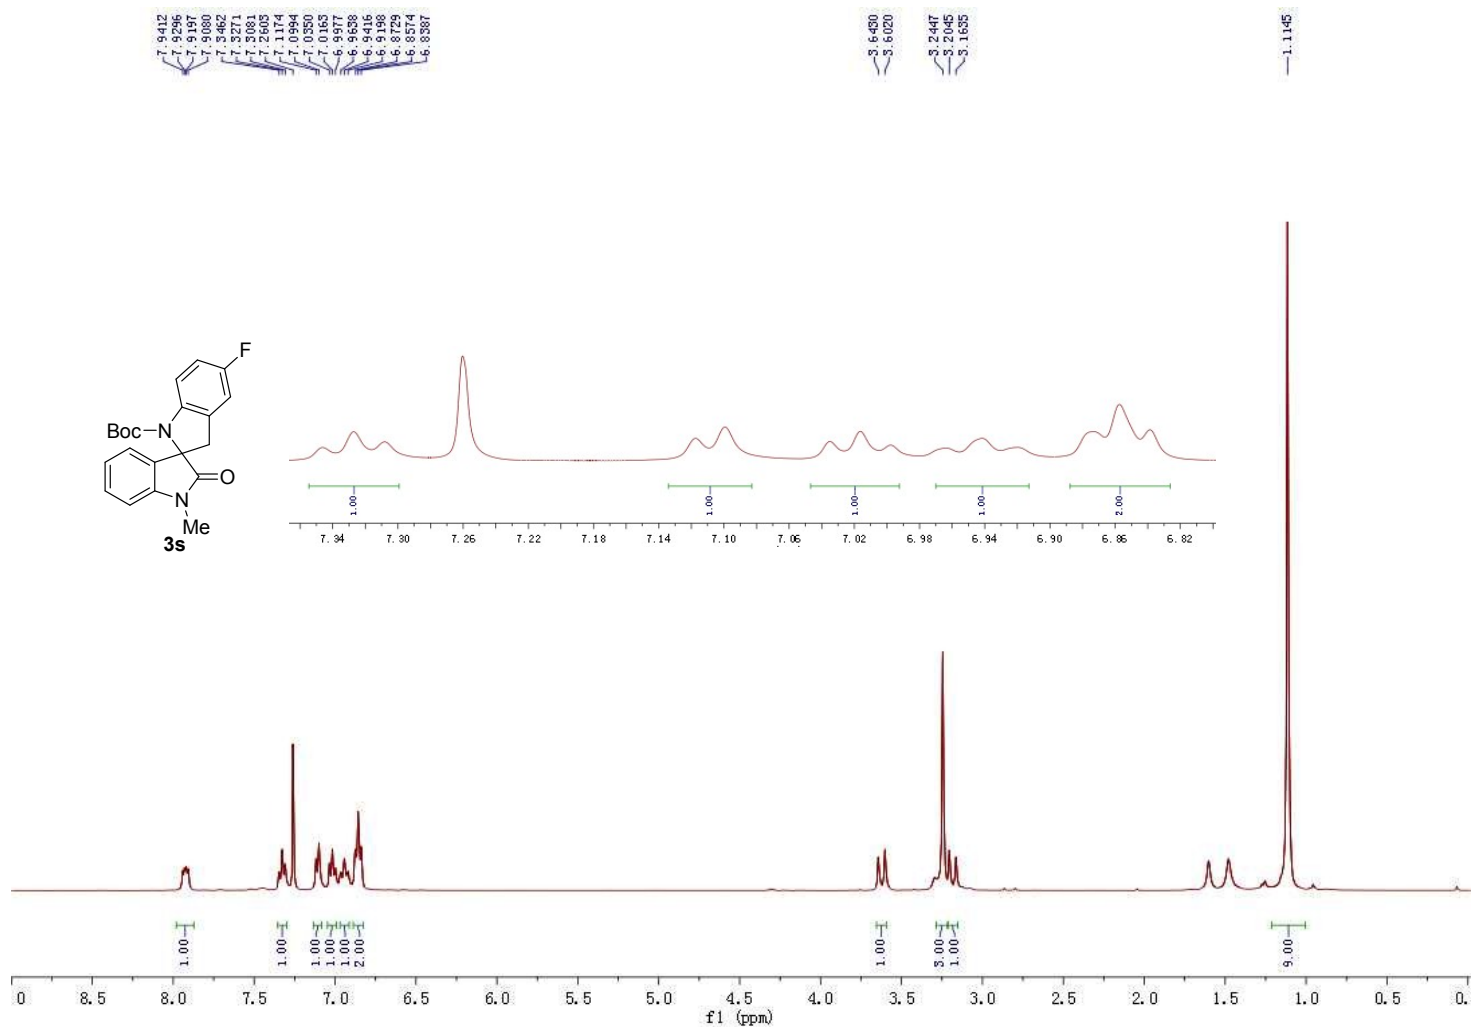



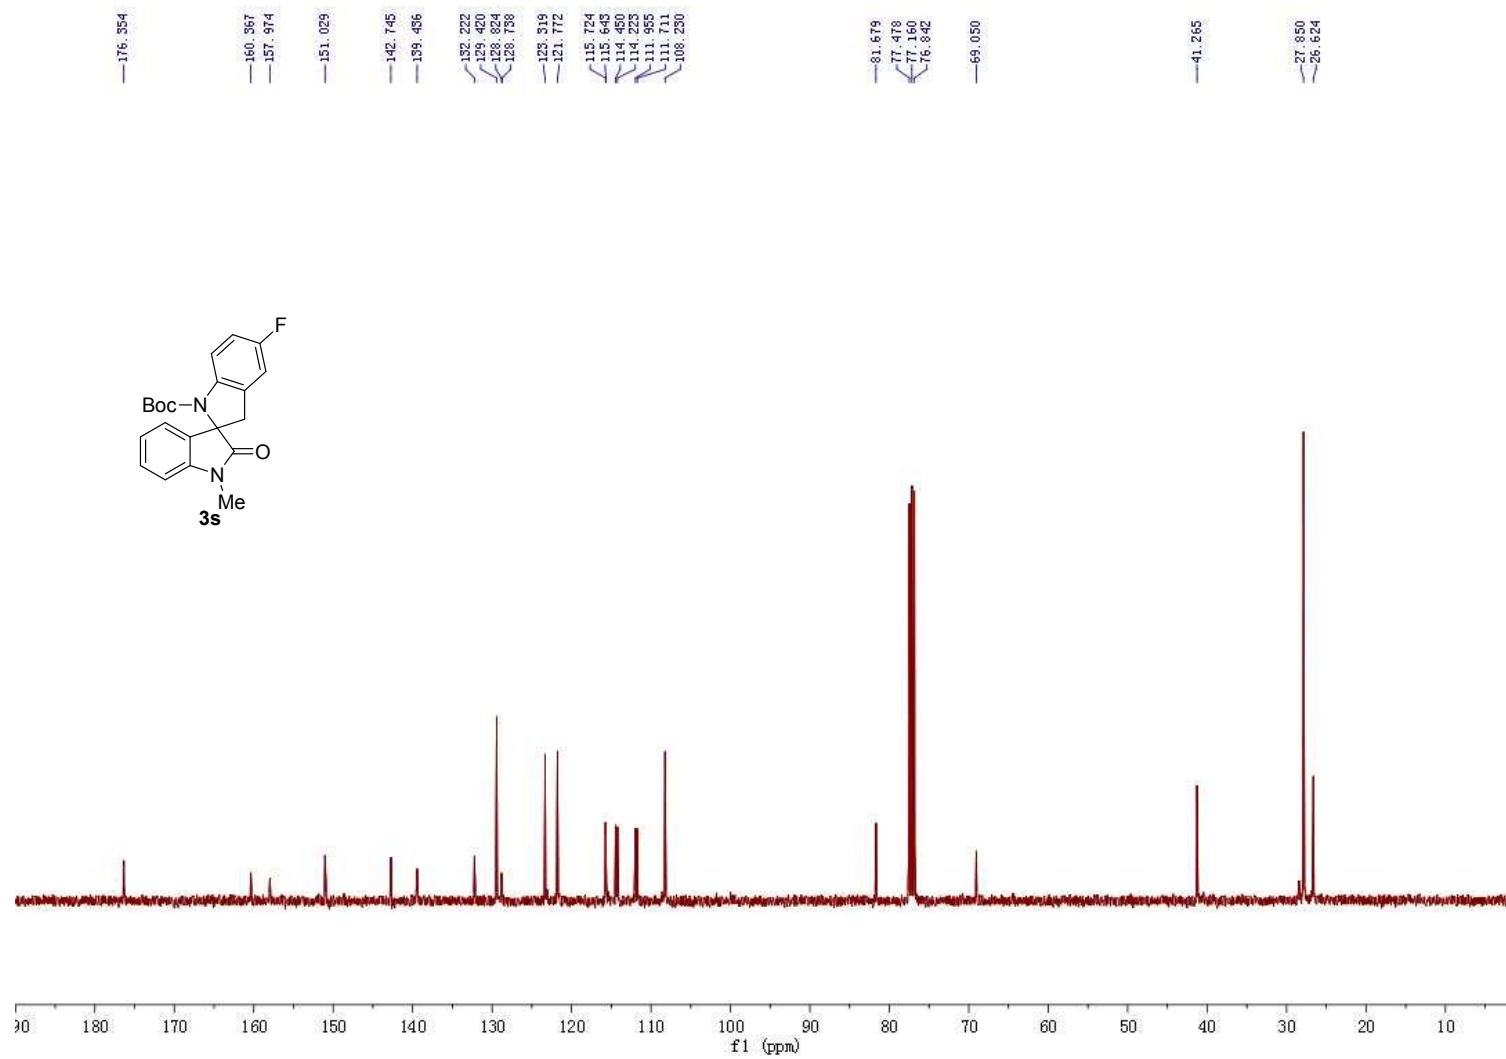



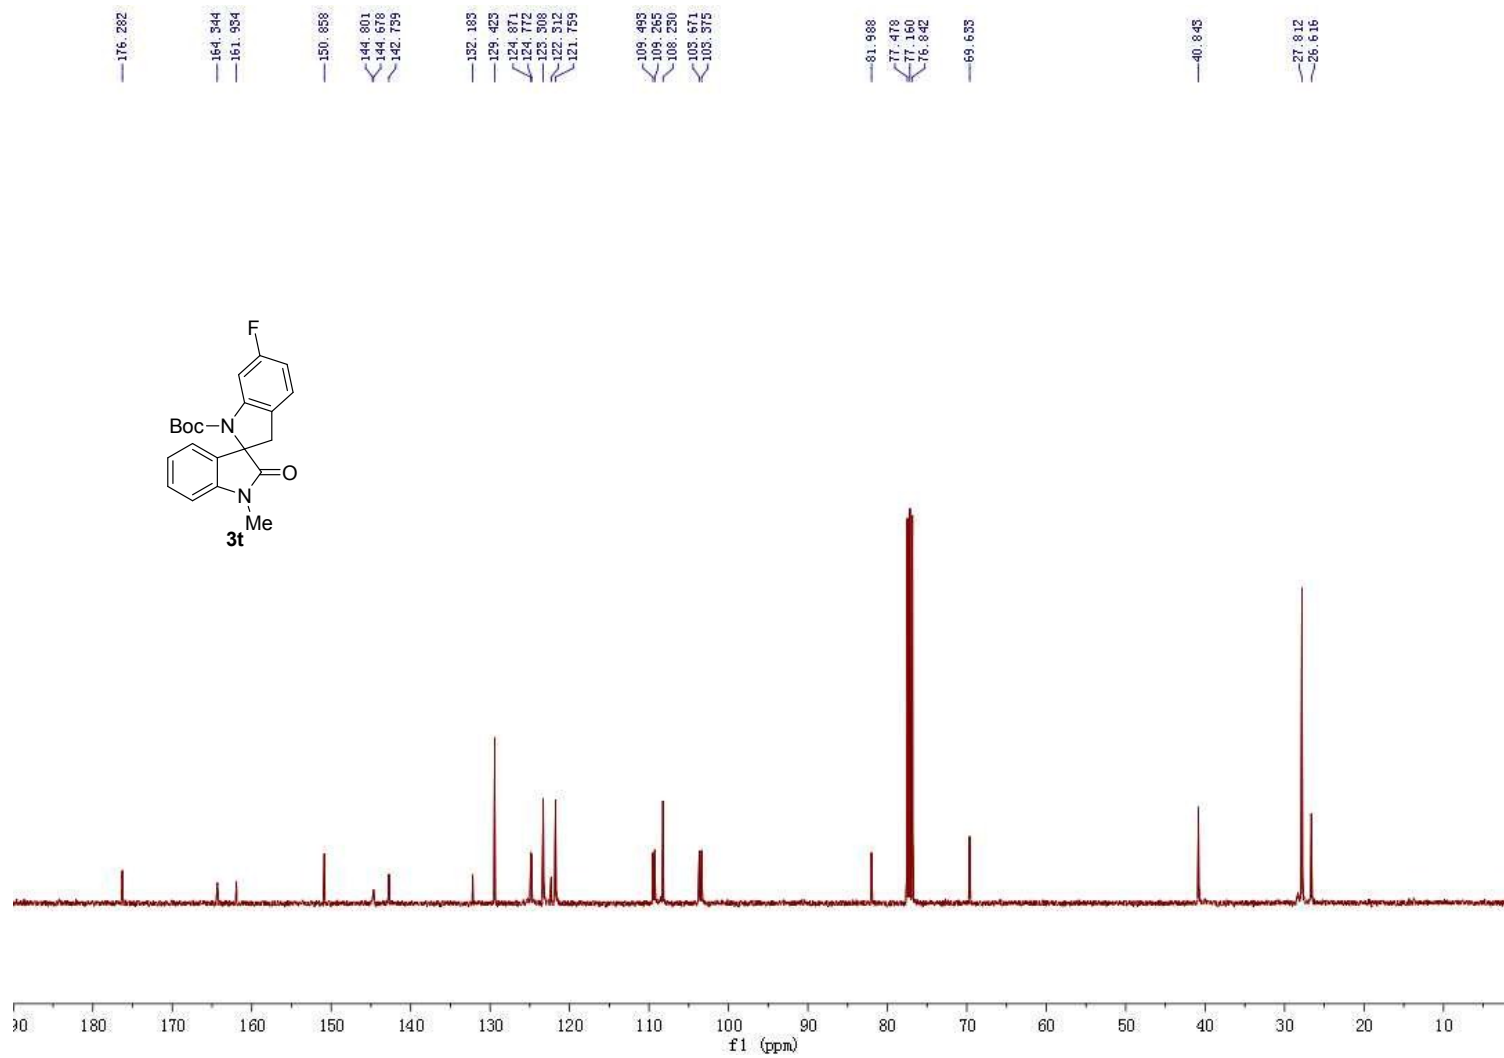

# <sup>1</sup>H and <sup>13</sup>C NMR of 3u

8.0742  
8.0537  
7.5975  
7.5765  
7.5423  
7.5416  
7.5226  
7.5254  
7.1147  
7.0970  
7.0728  
7.0285  
7.0104  
6.8759  
6.8566

3.6865  
3.6465  
3.2780  
3.2561

1.1263

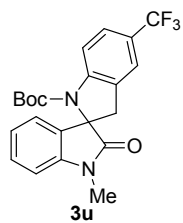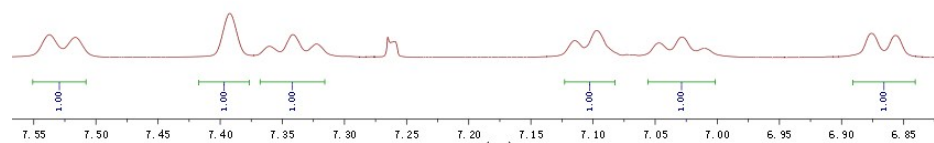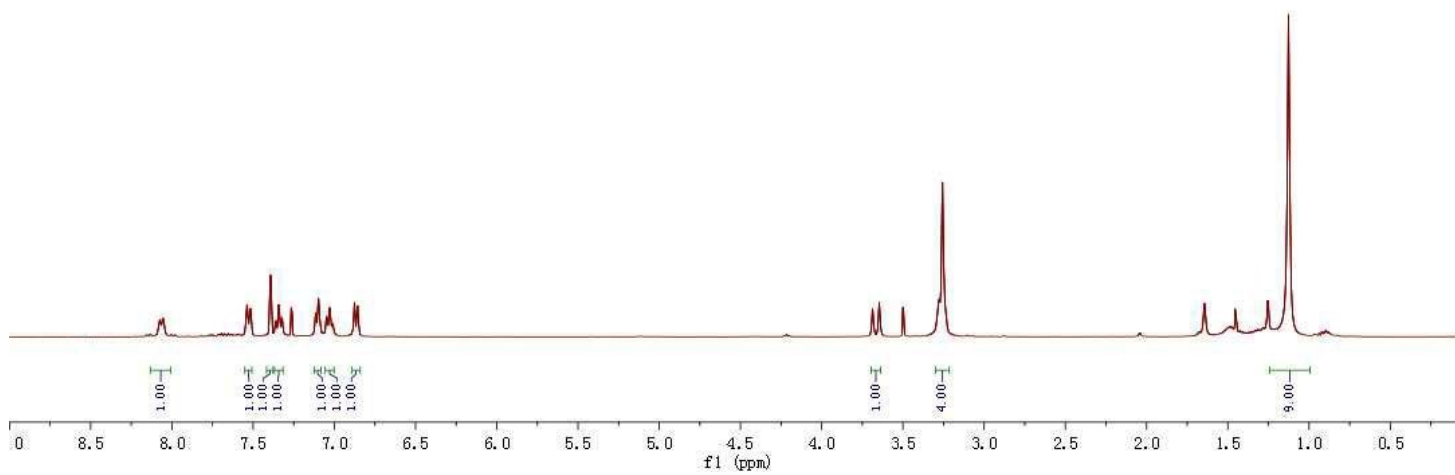

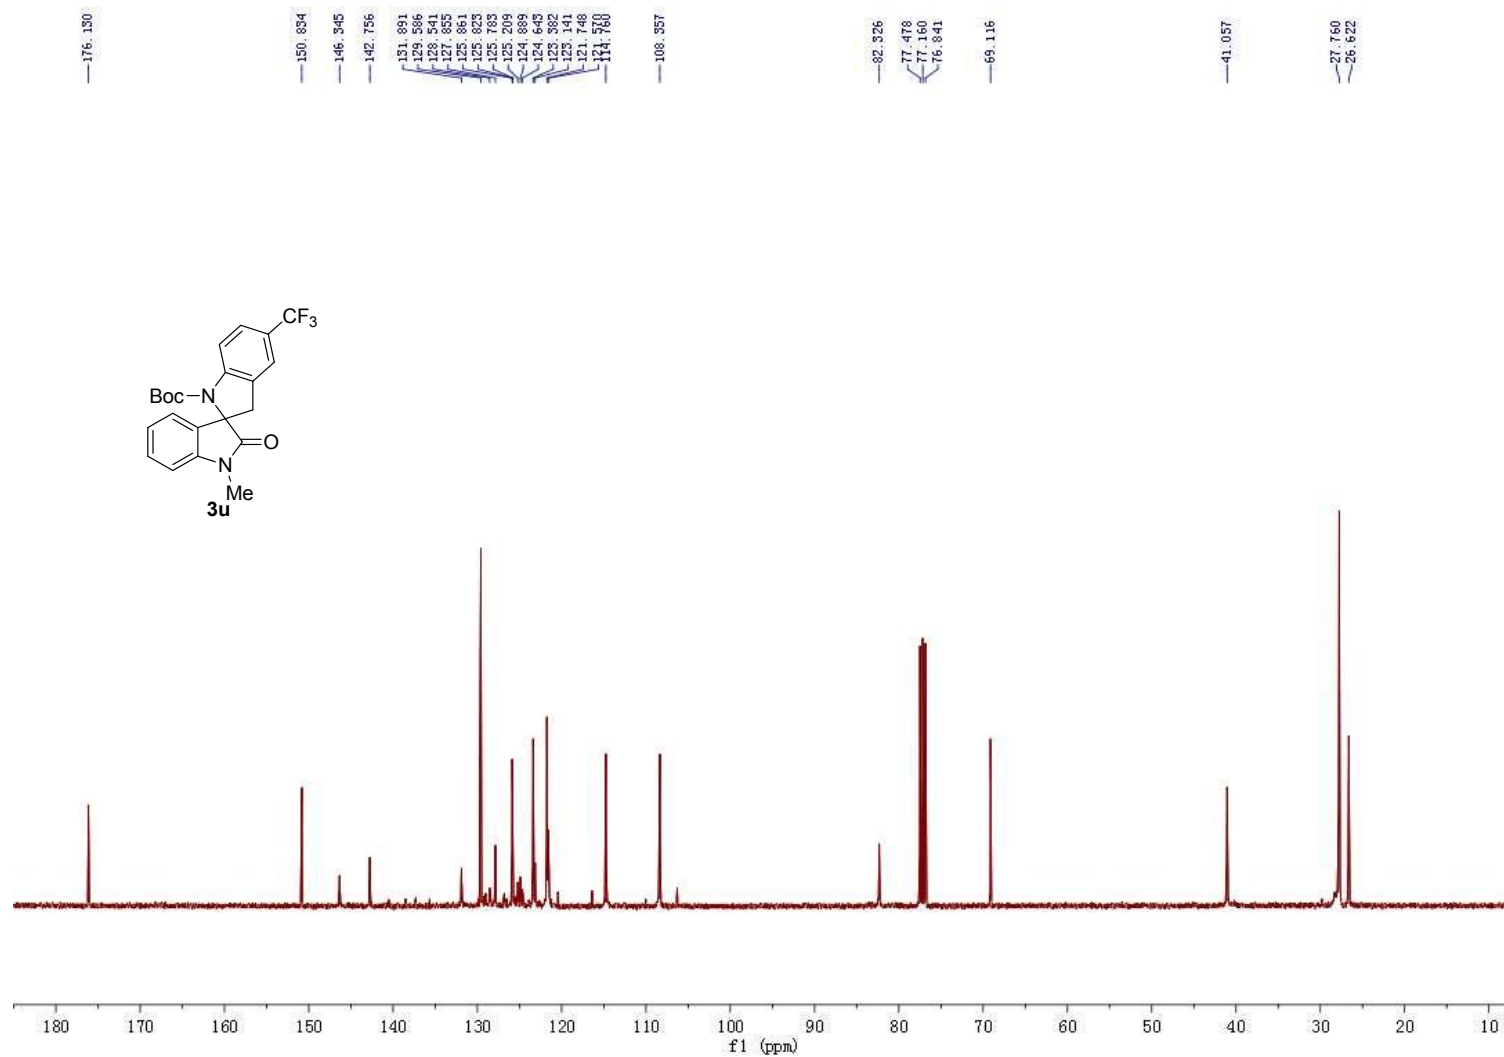



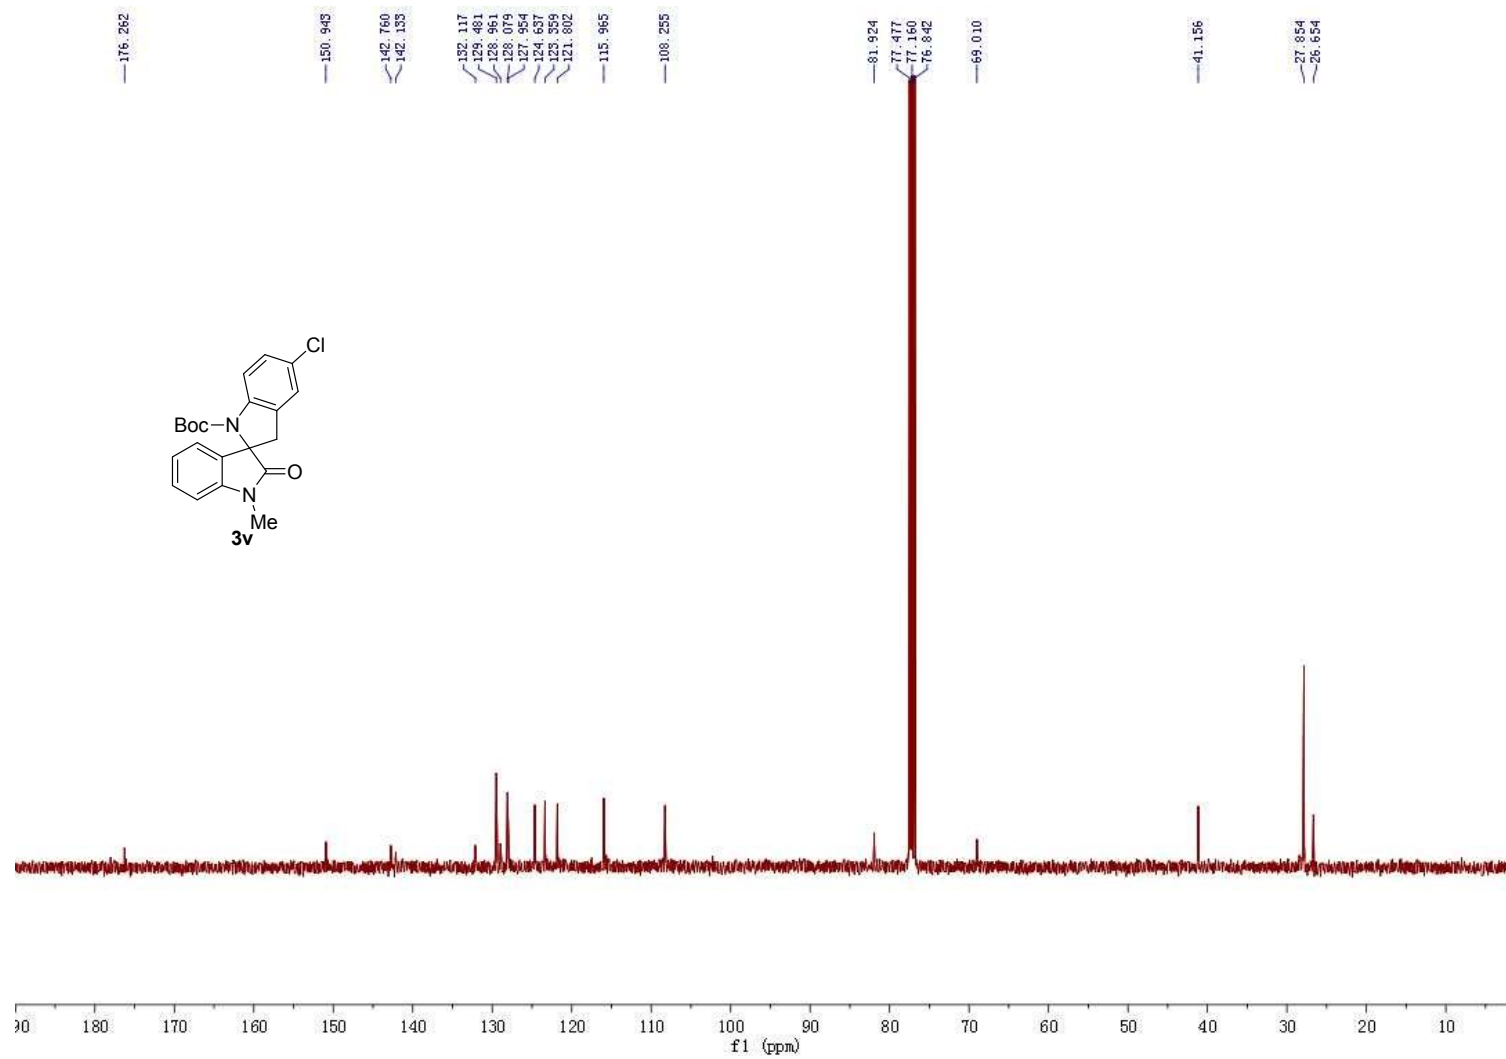

# <sup>1</sup>H and <sup>13</sup>C NMR of 3w

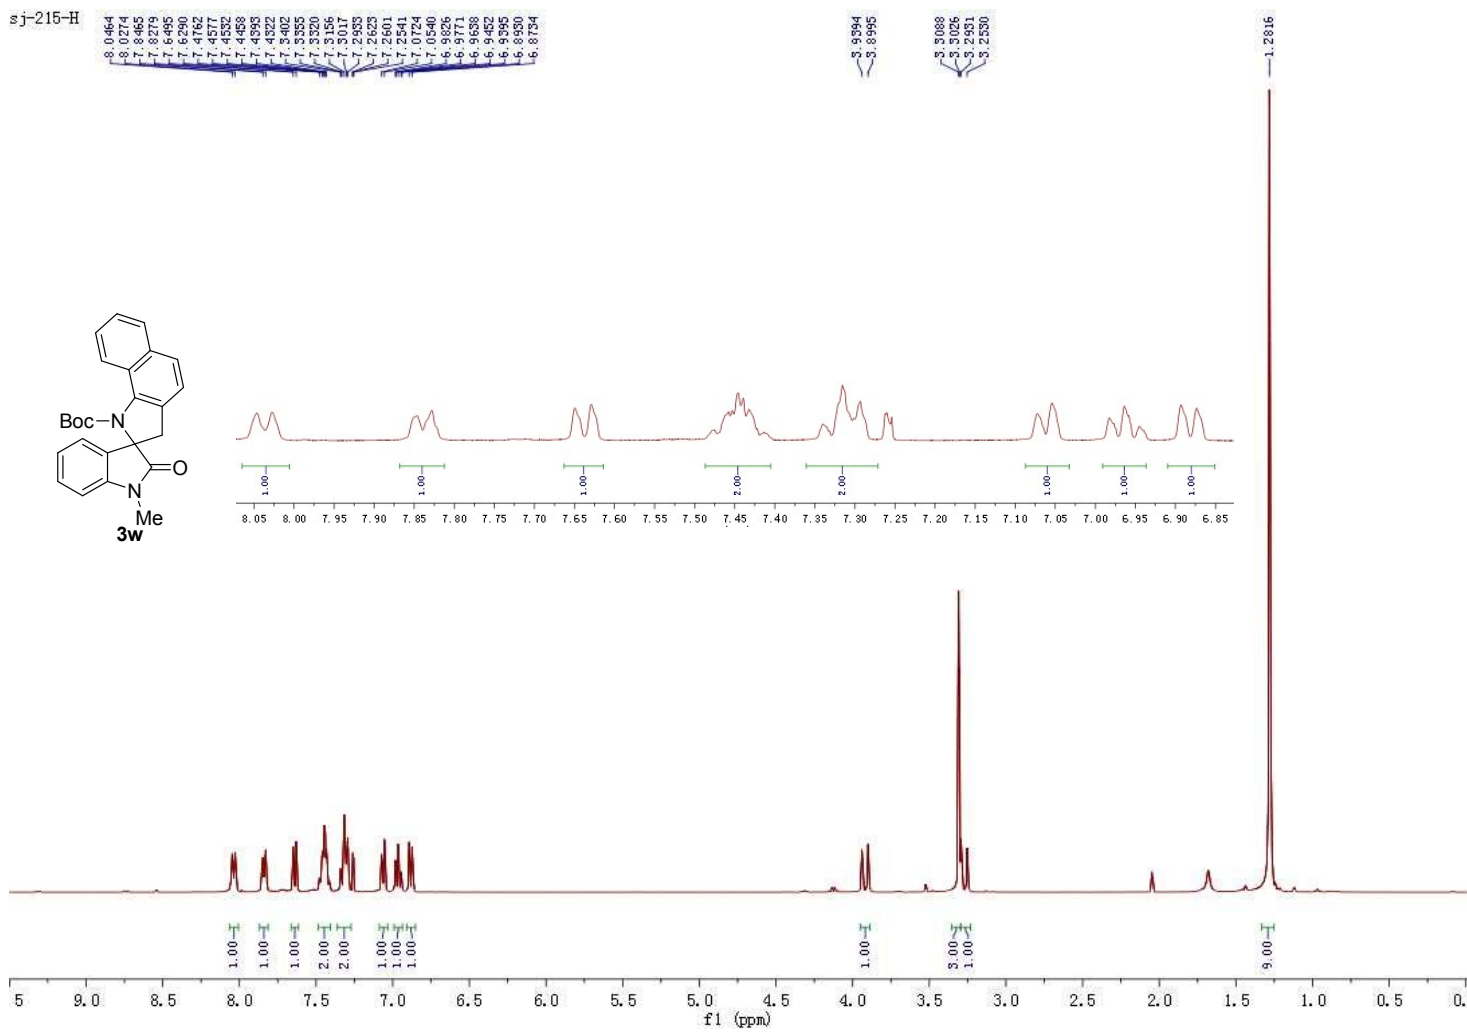



215-C

176.324

152.080

142.521  
138.355  
134.624  
132.578  
129.380  
128.430  
125.649  
125.915  
125.265  
124.886  
123.204  
122.131

108.245

81.982

77.478

76.842

70.636

42.956

27.841

26.718

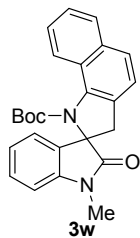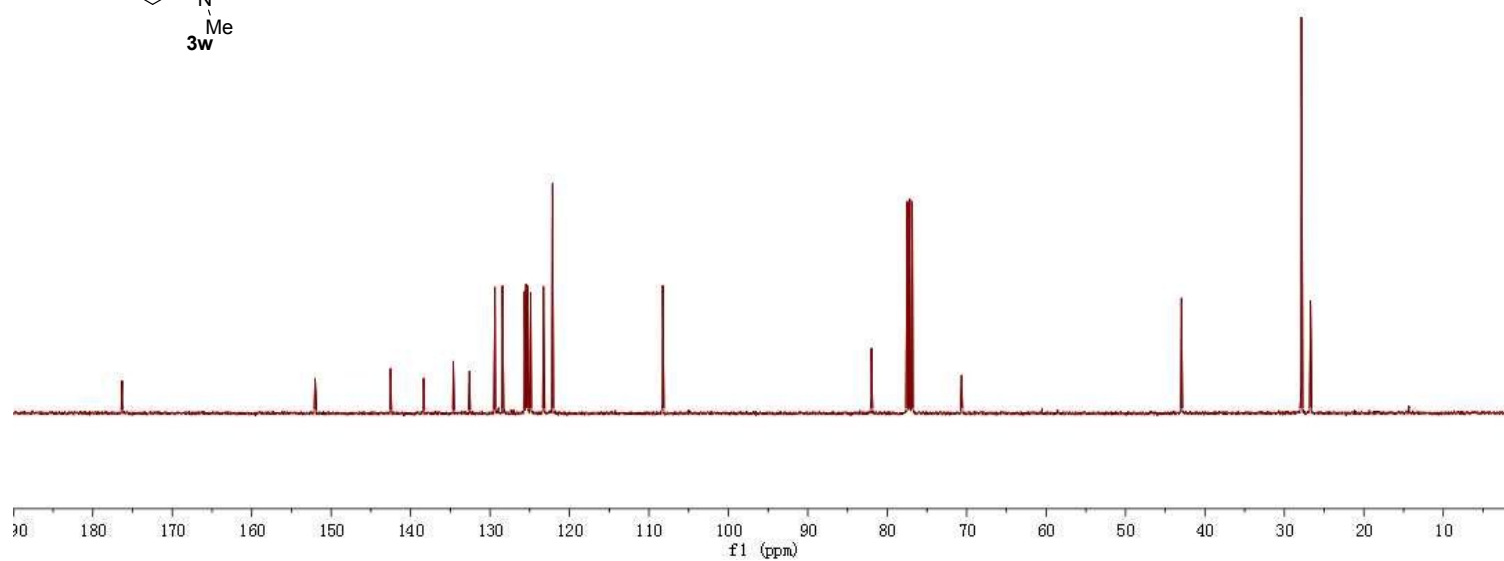

# <sup>1</sup>H and <sup>13</sup>C NMR of 3x

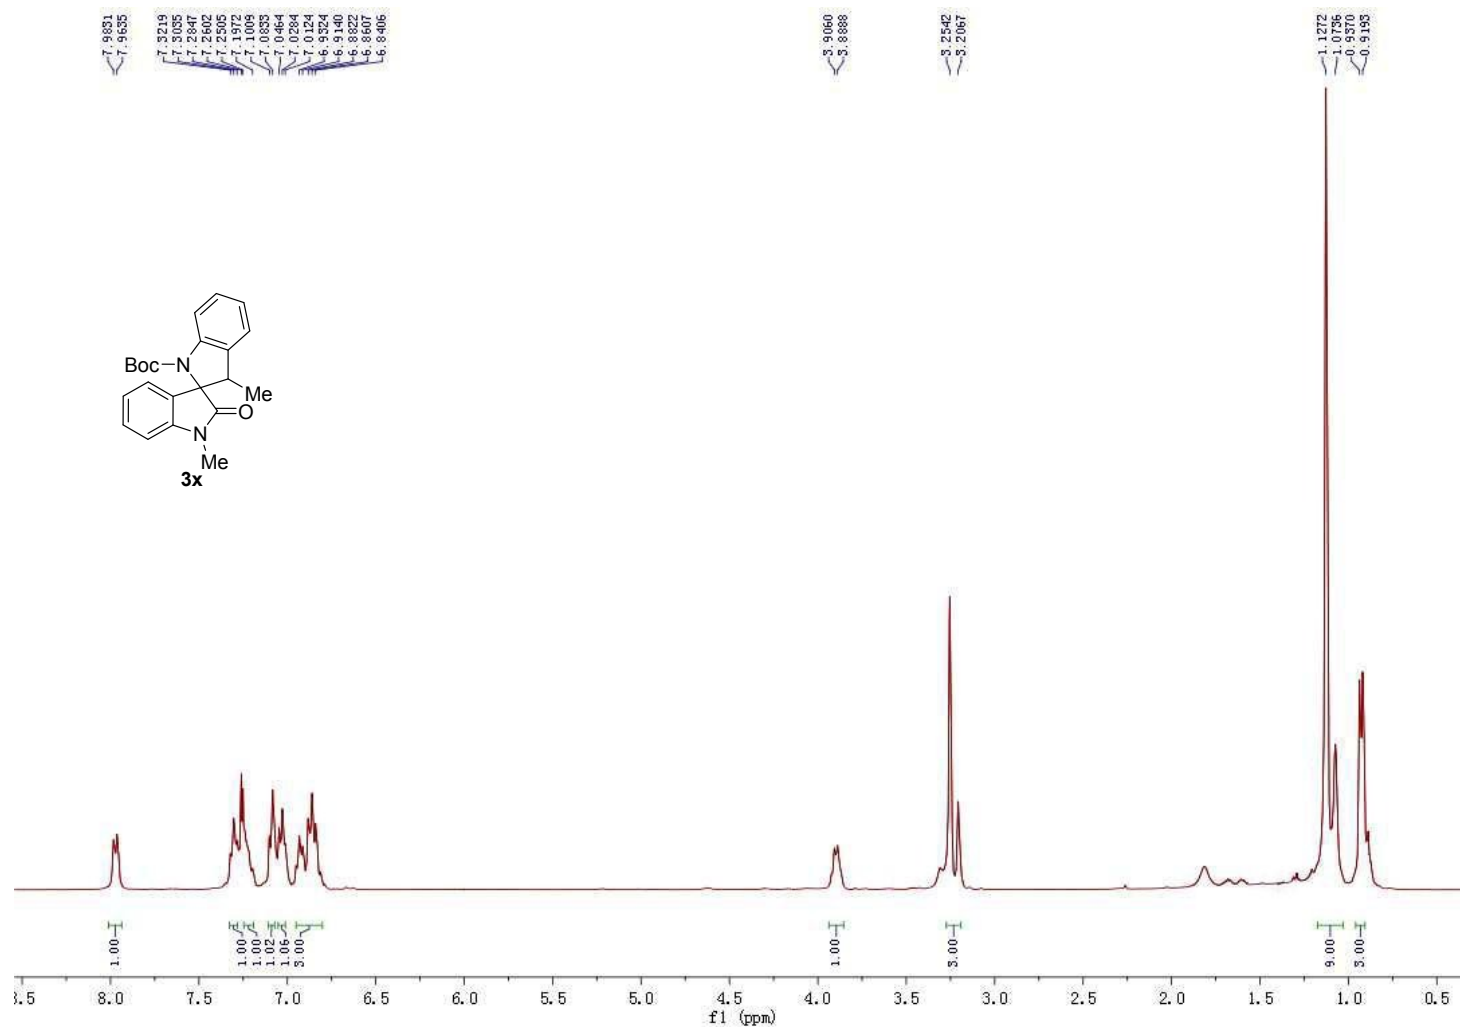

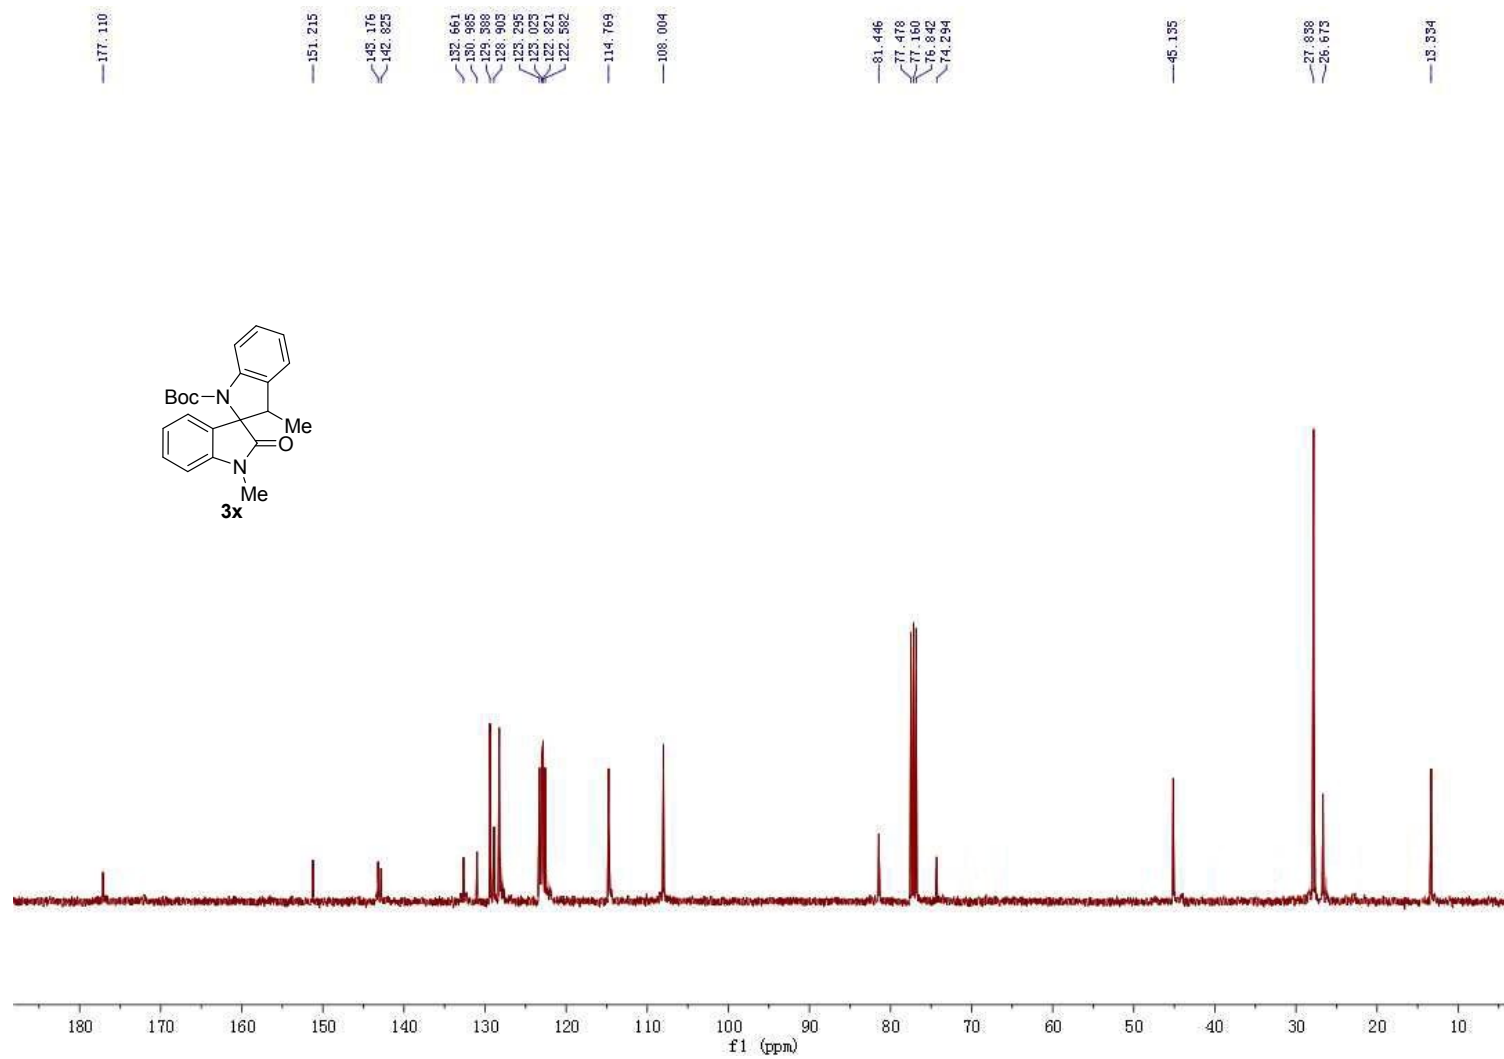

# <sup>1</sup>H and <sup>13</sup>C NMR of 3y

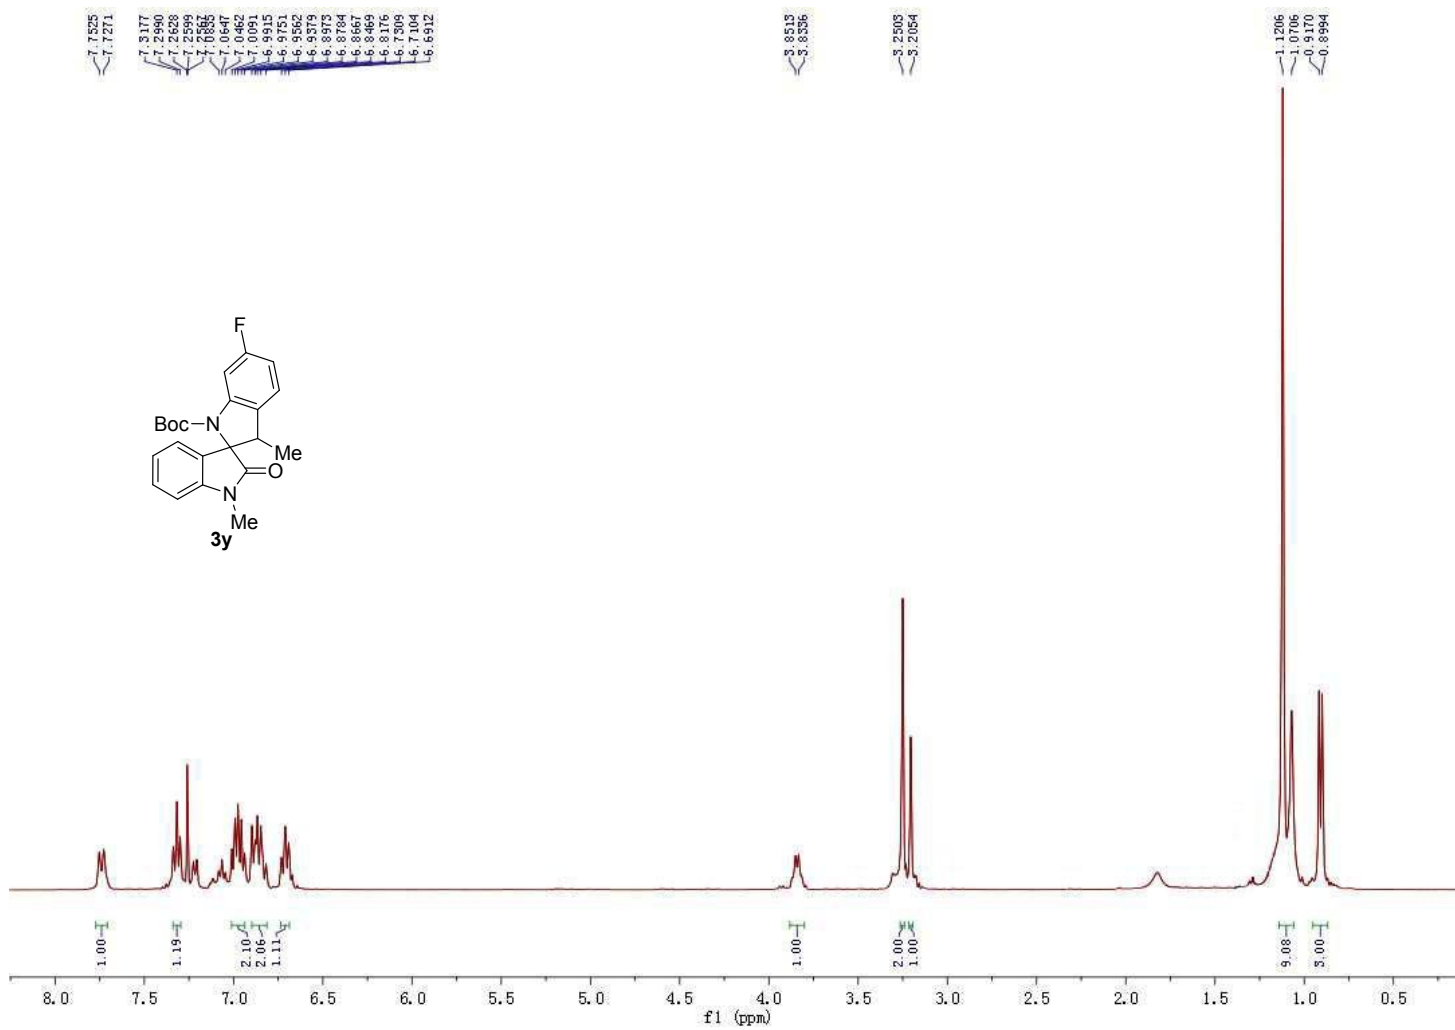

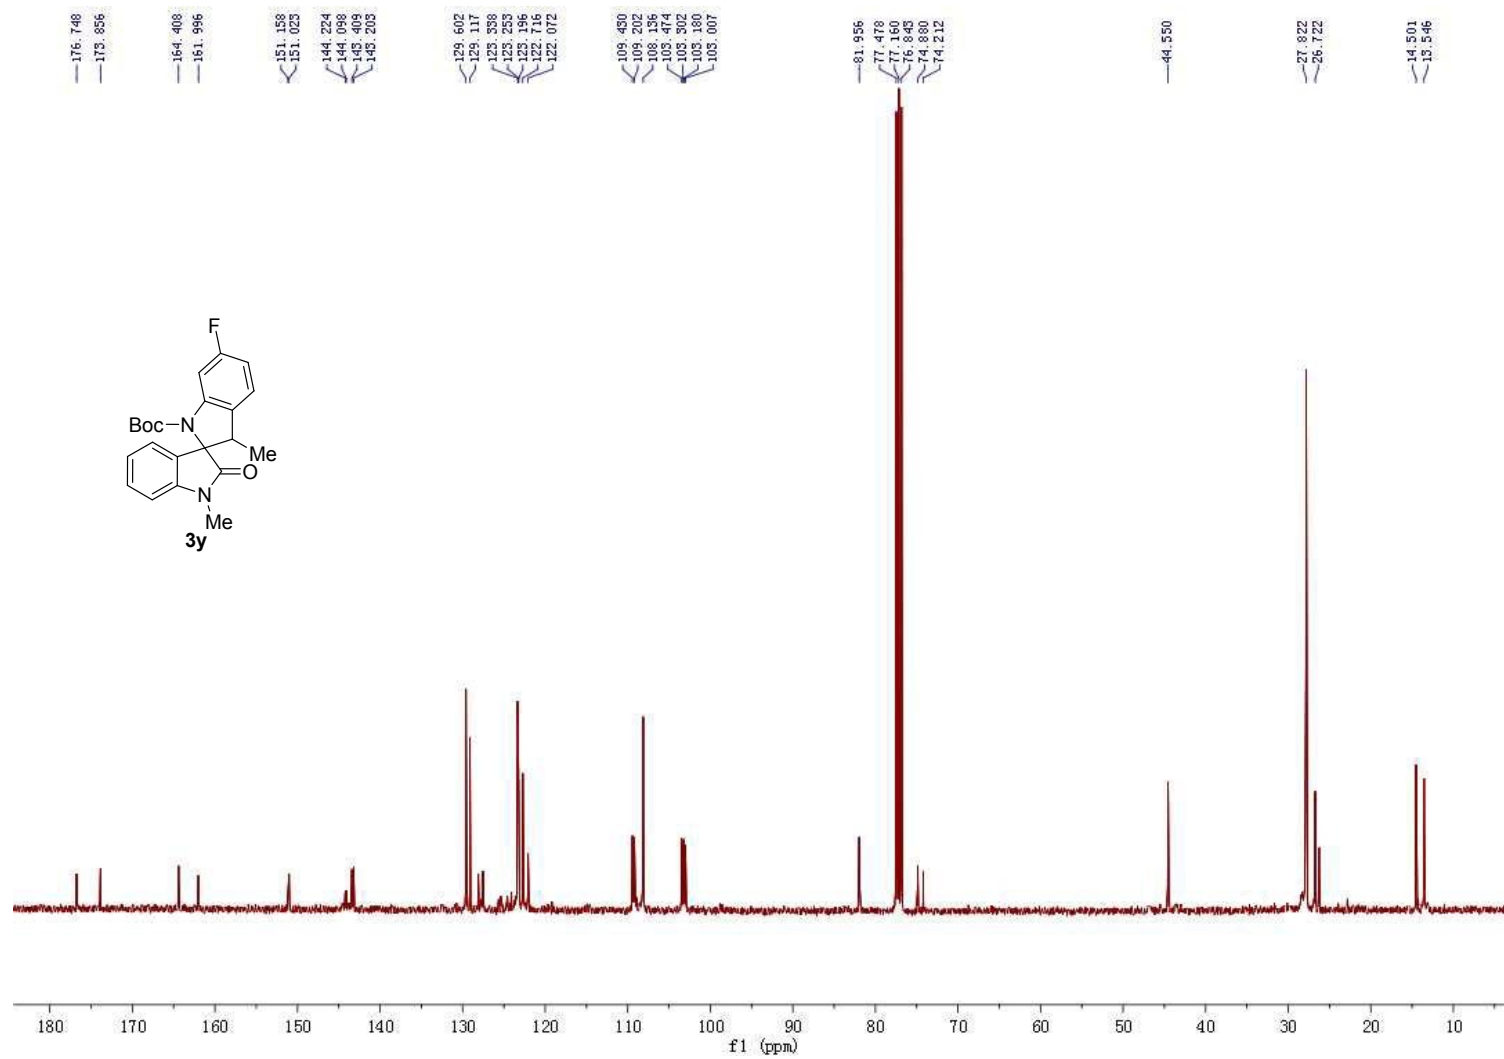

# <sup>1</sup>H and <sup>13</sup>C NMR of 3z

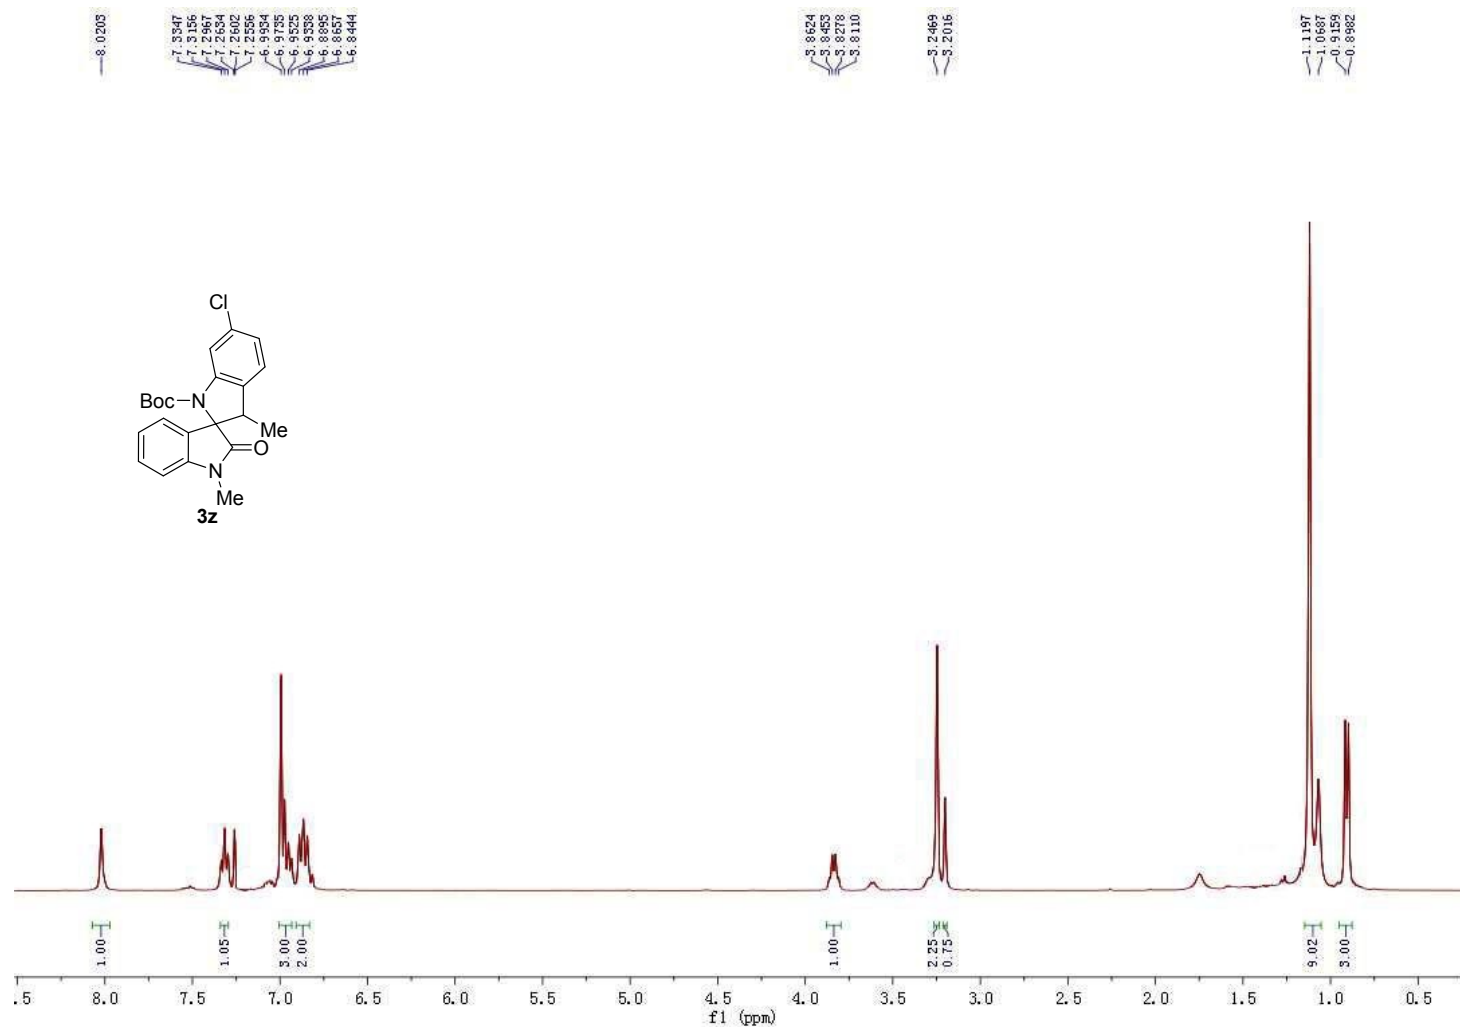

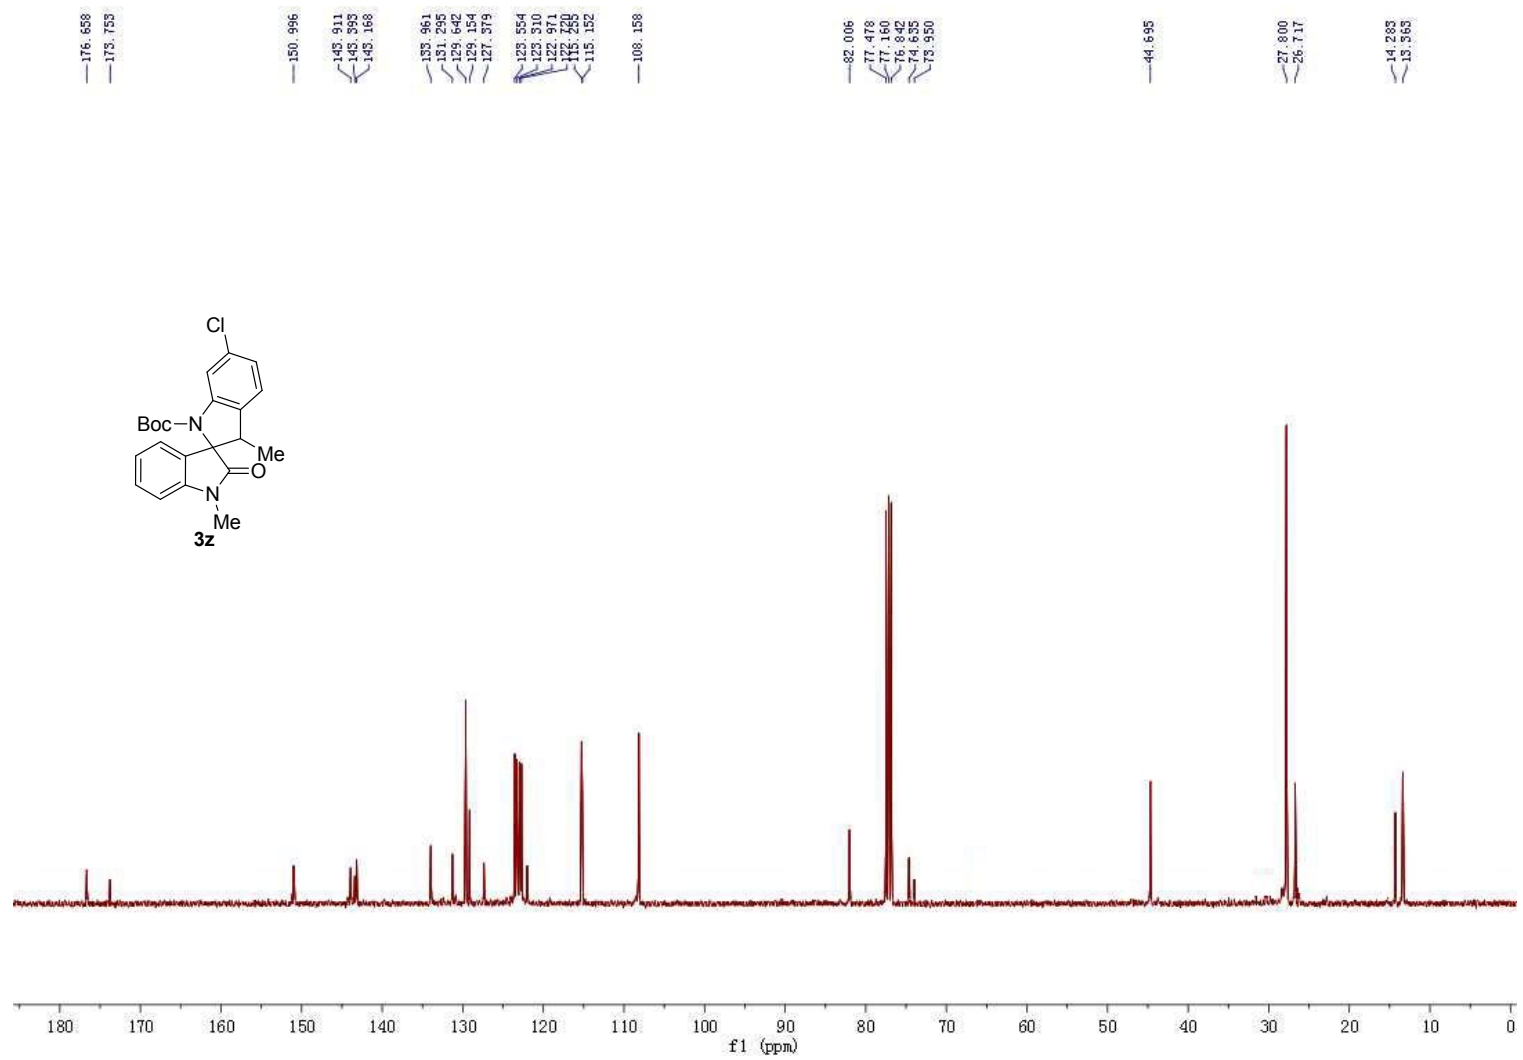

<sup>1</sup>H and <sup>13</sup>C NMR of 3a'

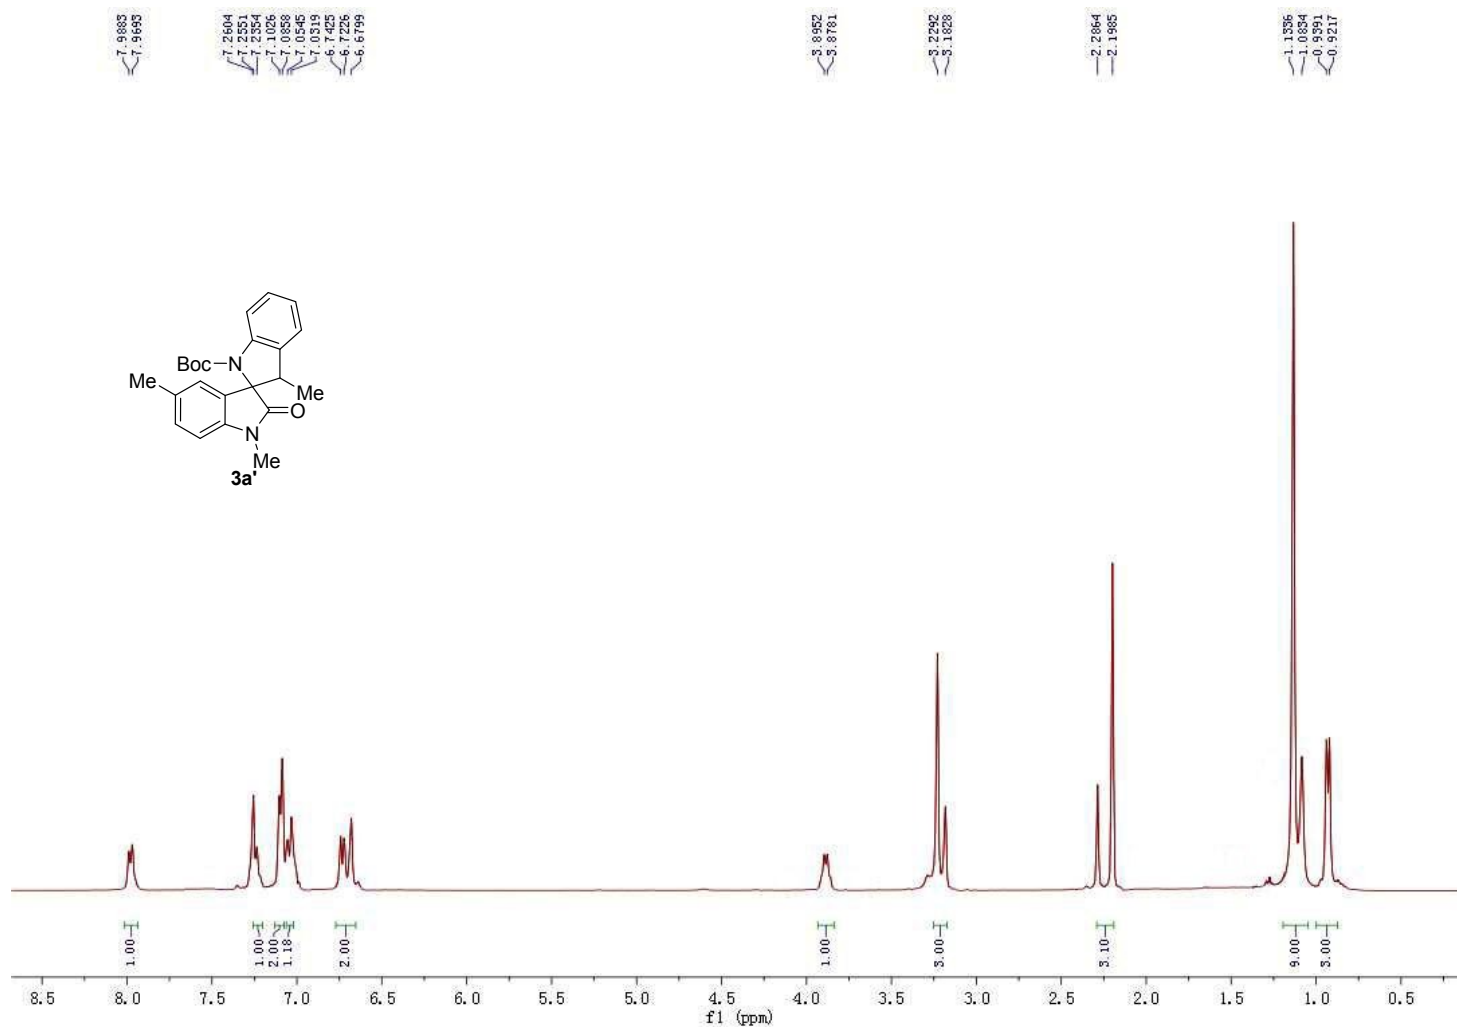



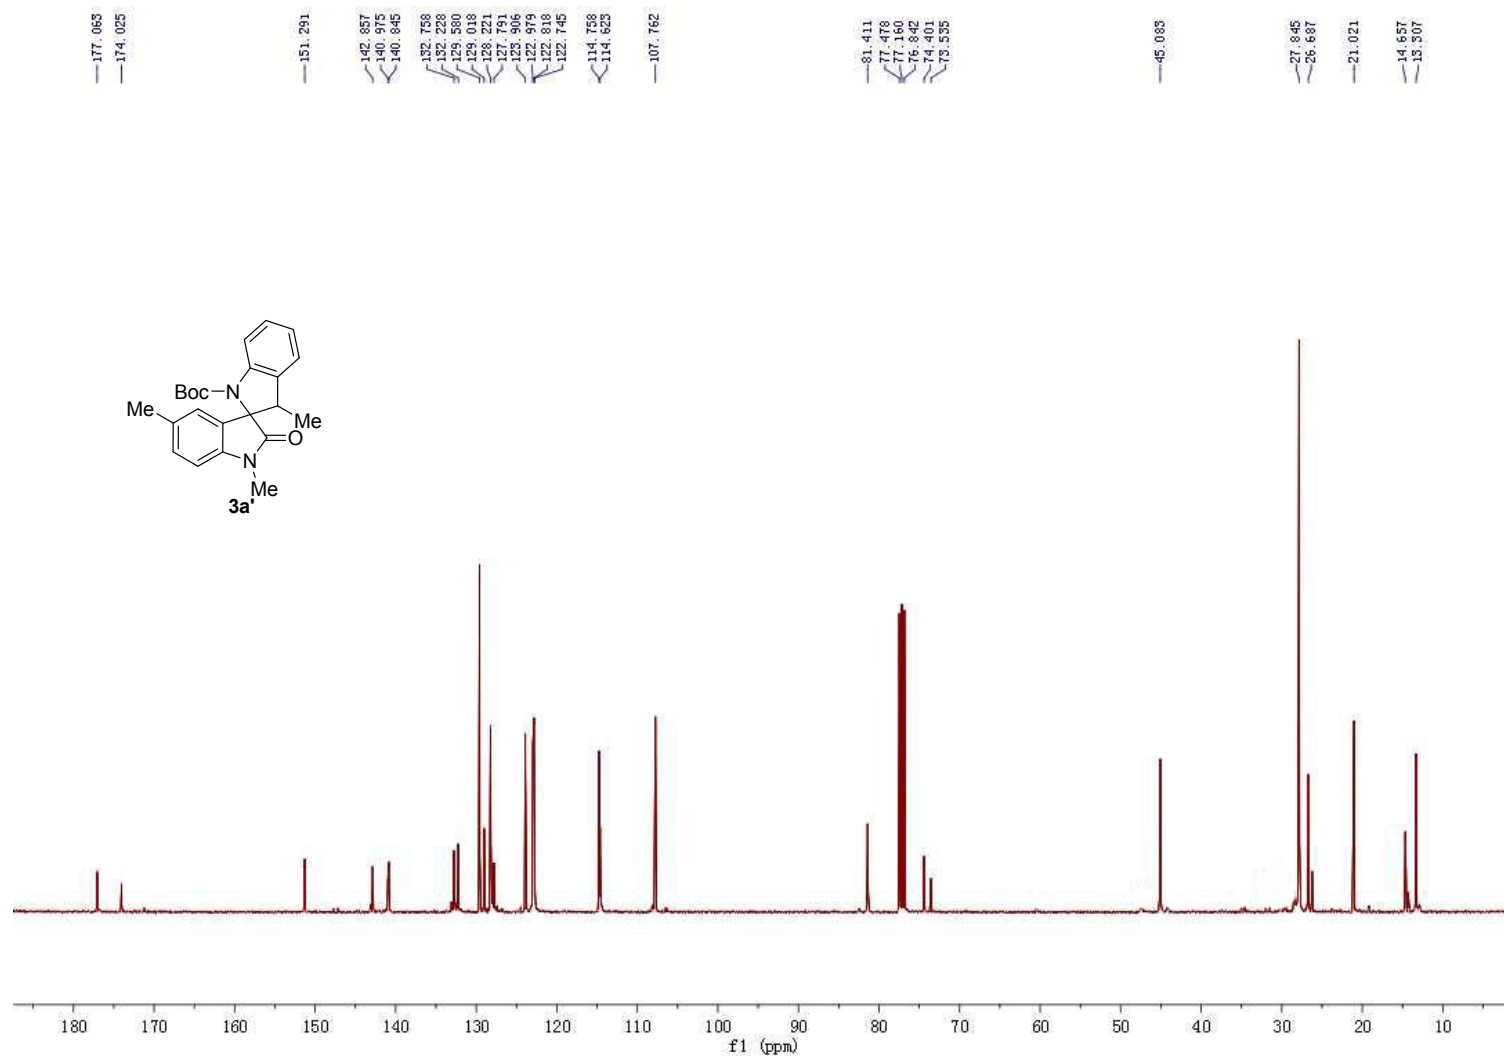

# <sup>1</sup>H and <sup>13</sup>C NMR of 3b'

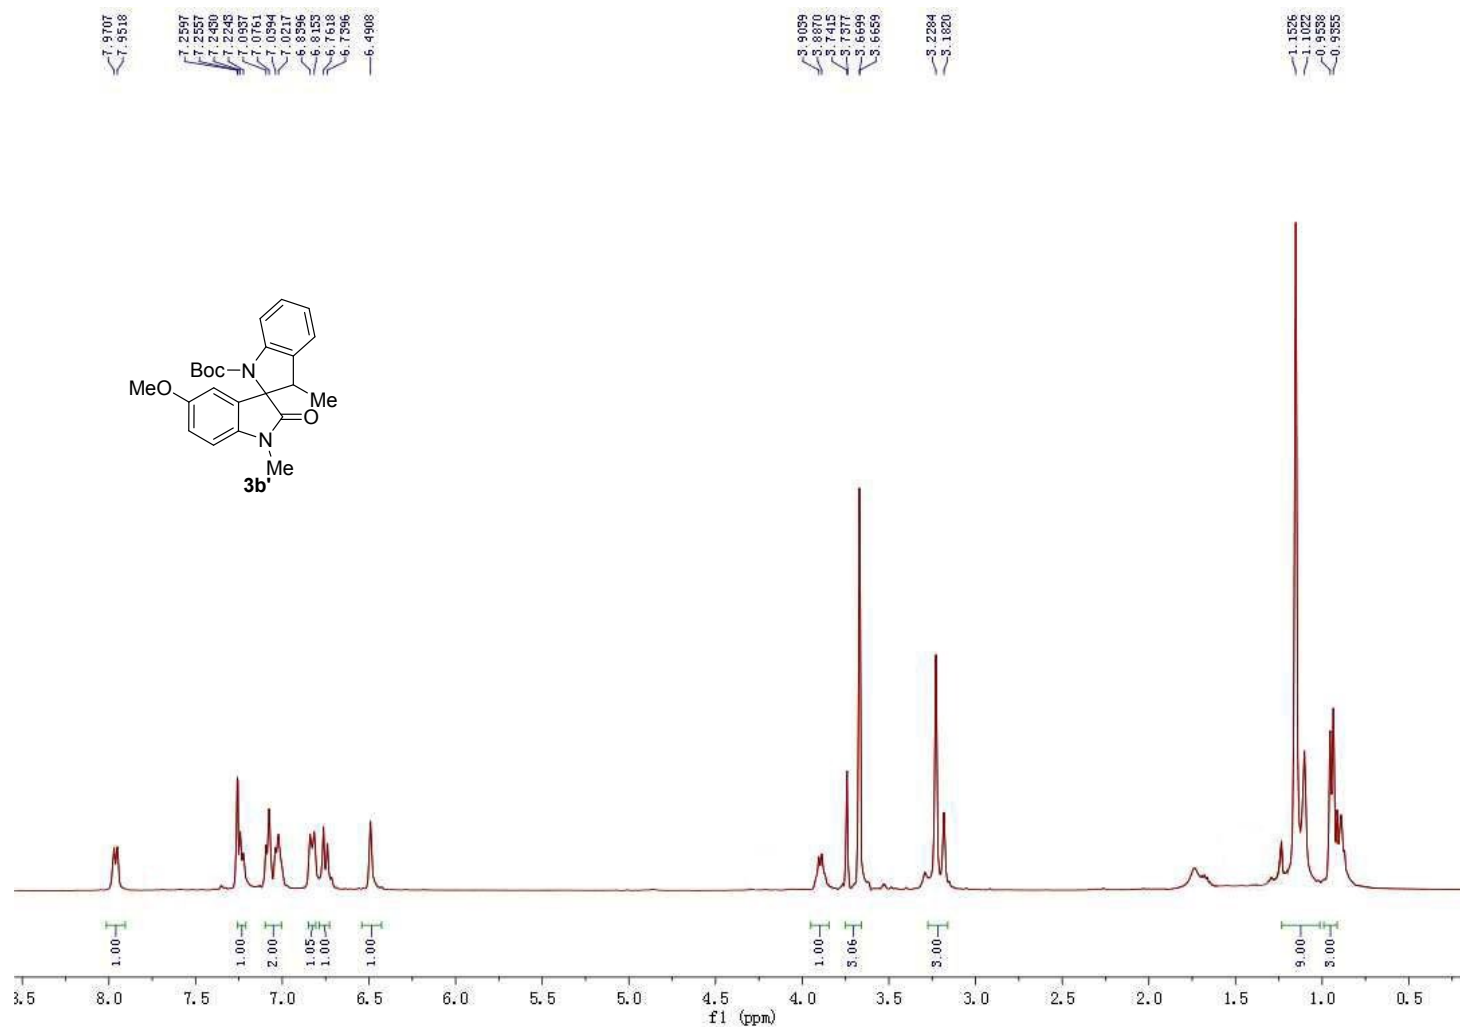

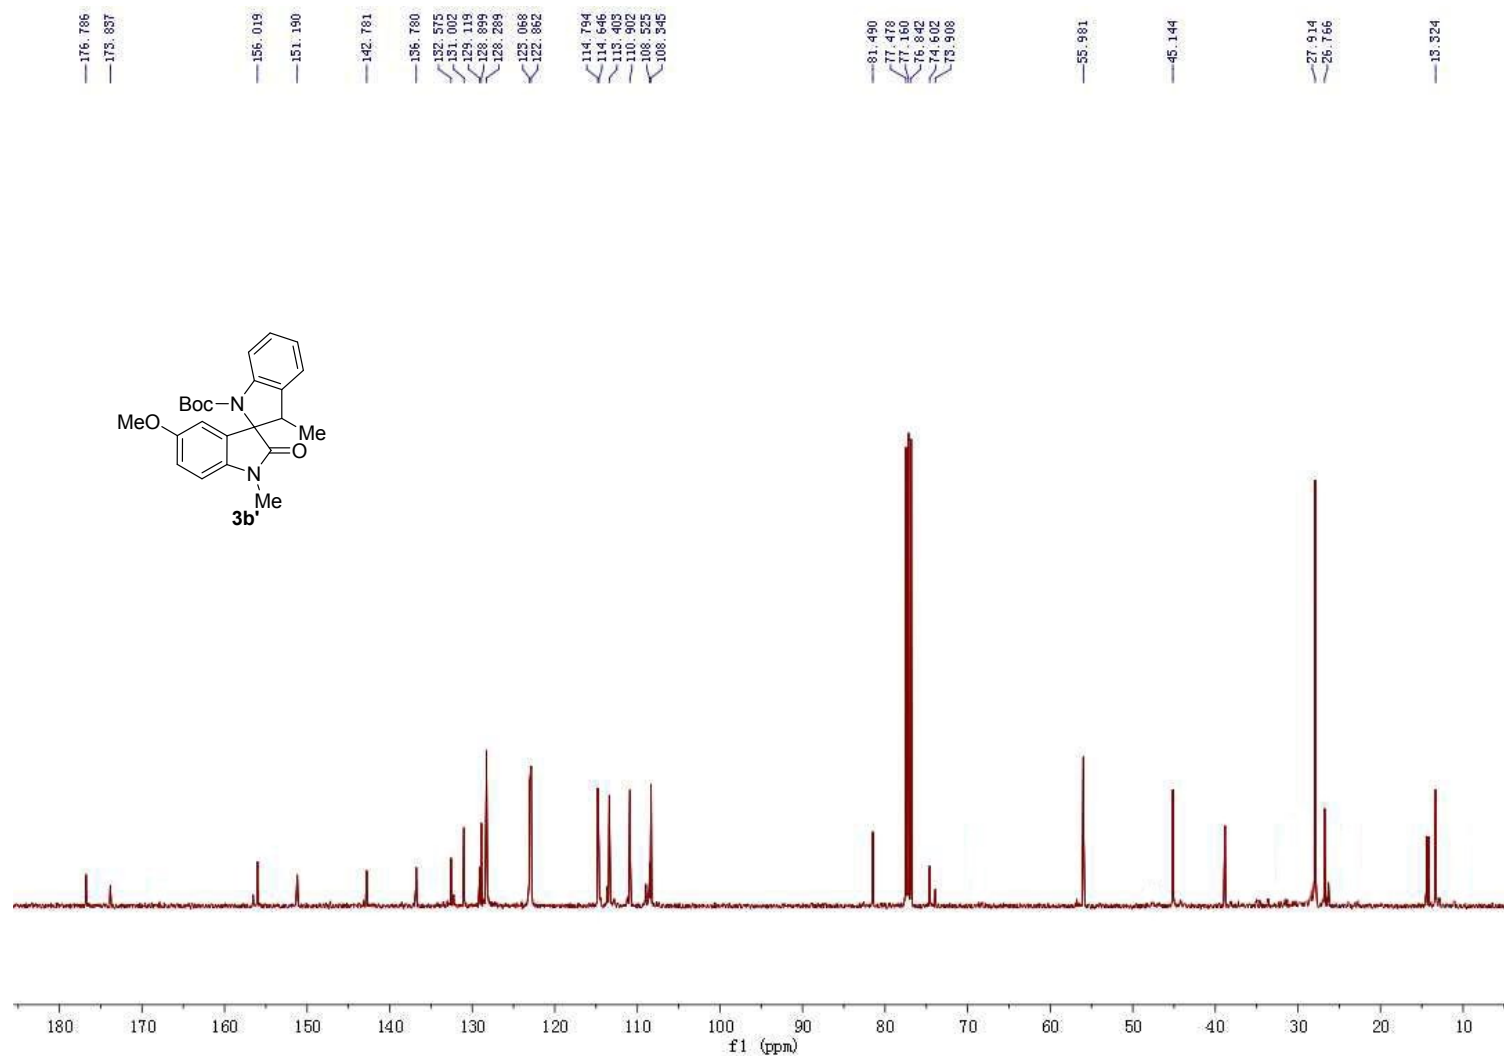

# <sup>1</sup>H and <sup>13</sup>C NMR of 3c'

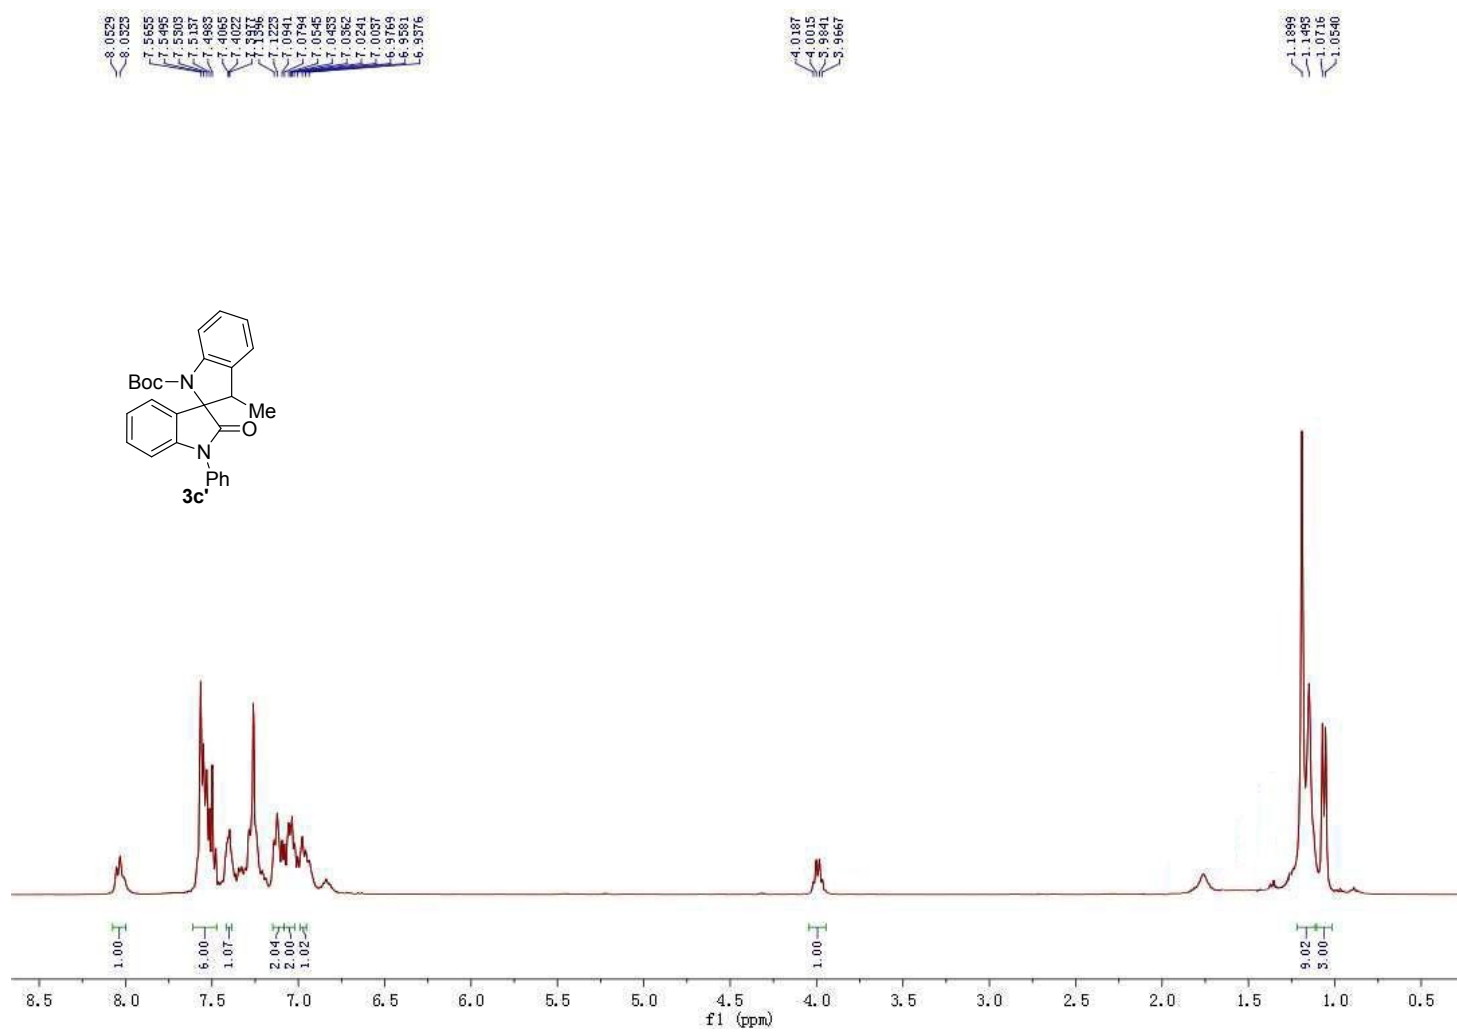

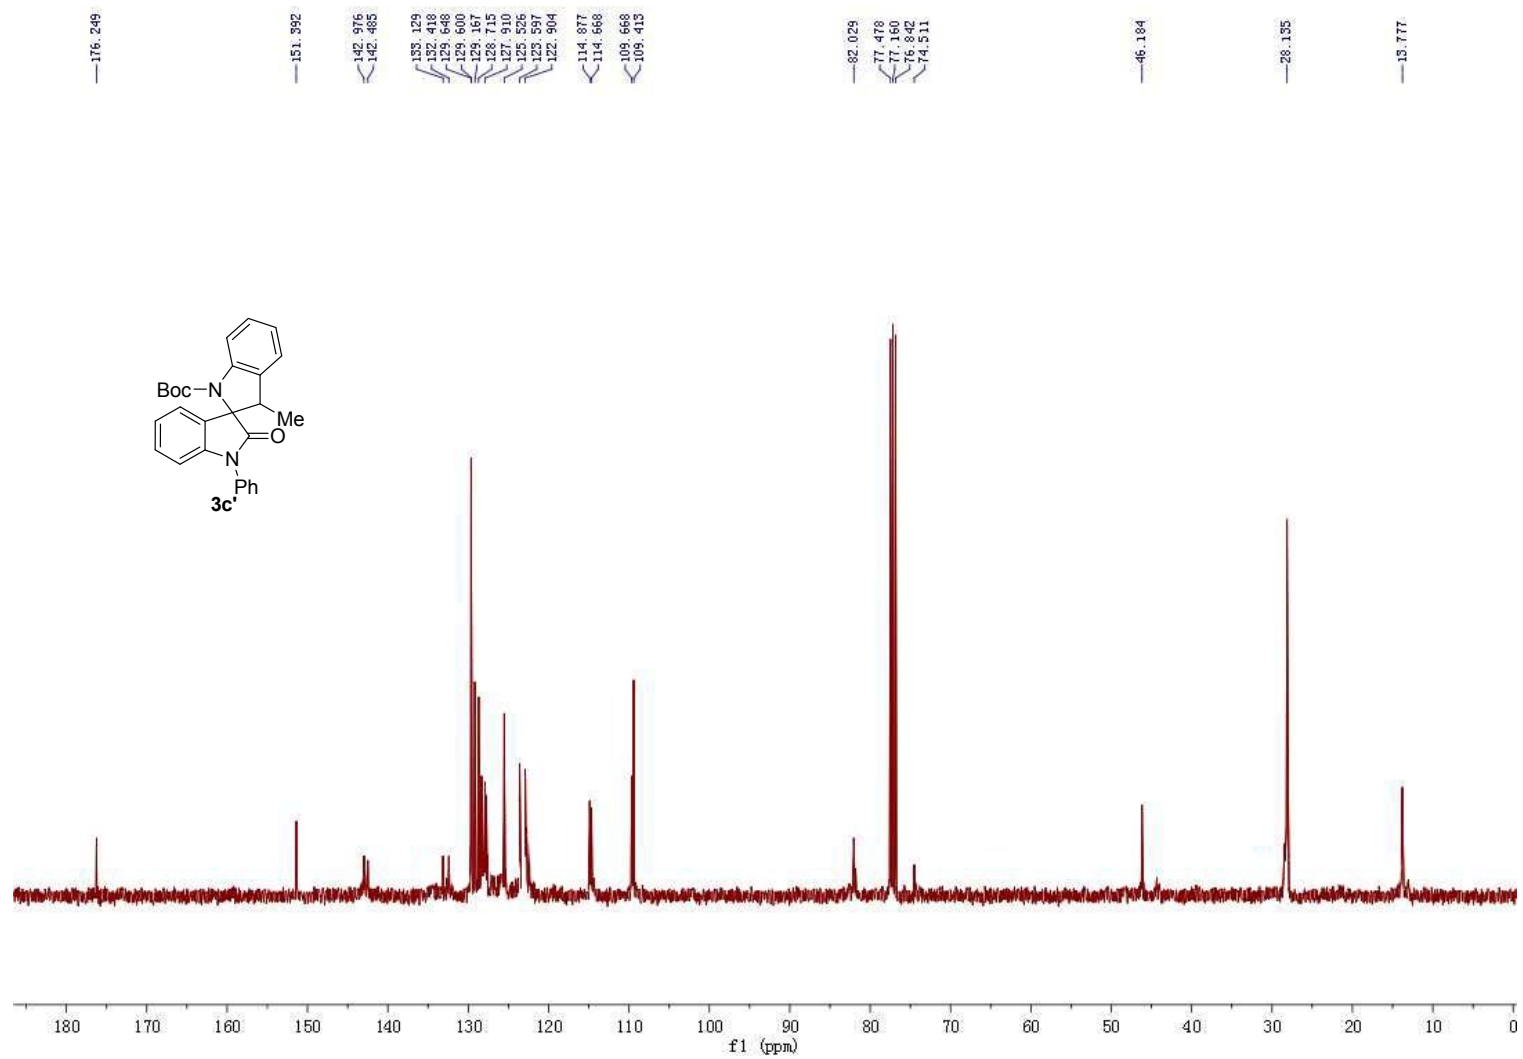

# <sup>1</sup>H and <sup>13</sup>C NMR of 4

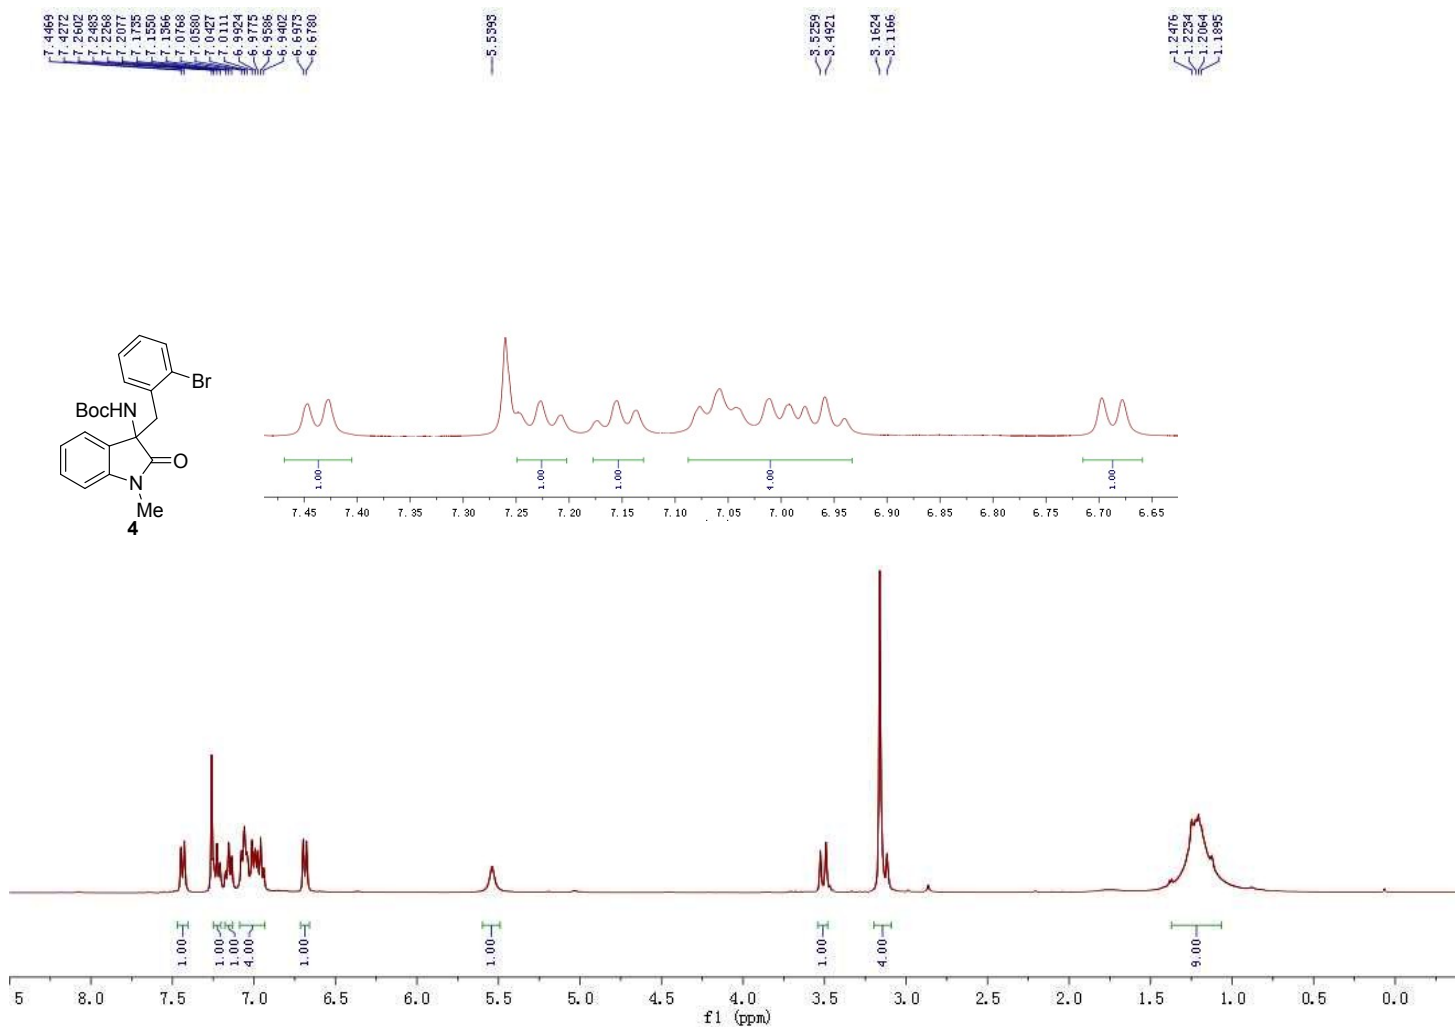

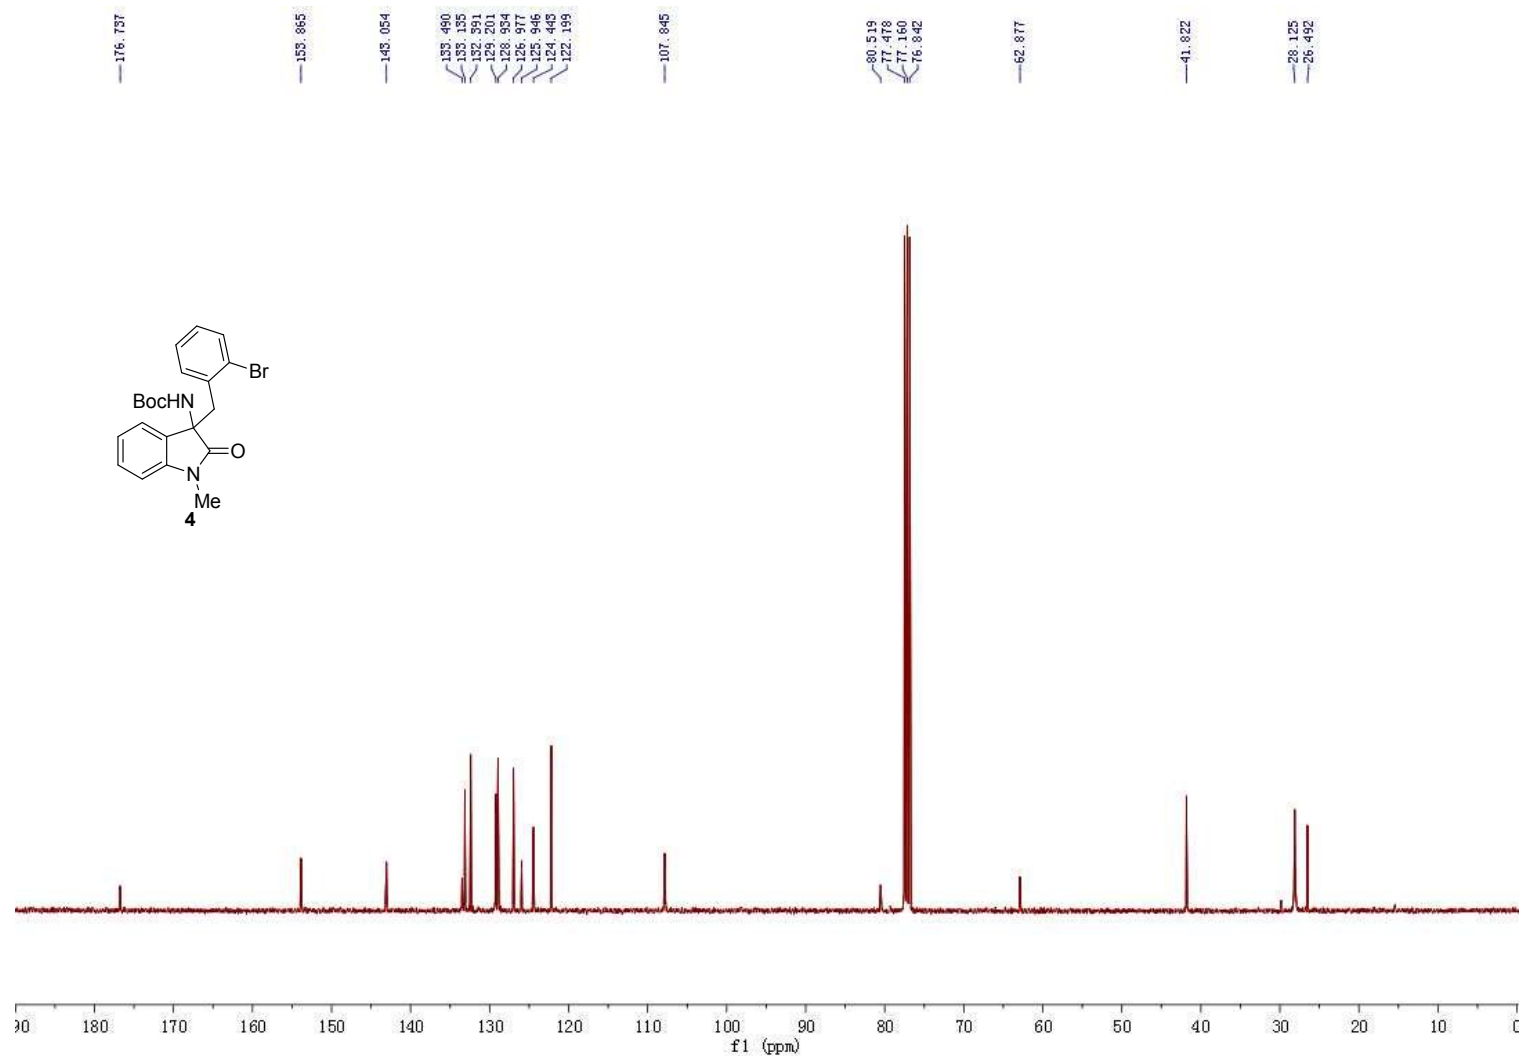

Supplement: c7ob01343d1.pdf [file c7ob01343d1.pdf]
